# Supplementary material for: Sexual dimorphism in insulin resistance in a metabolic syndrome rat model
Source: PubMed Central journal article supplement — Endocr Connect. 2020 Aug 14;9(9):890–902. doi: 10.1530/EC-20-0288 (PMC7583132; doi:10.1530/ec-20-0288), 2020-08-14

Original blot used in figure 7, gonadal adipose tissue.

| Male |     | Female |     | OVX |     |
|------|-----|--------|-----|-----|-----|
| C    | HSD | C      | HSD | C   | HSD |

IRS1 →

— 250 KDa

— 150 KDa

50k →

PKC

IRS1

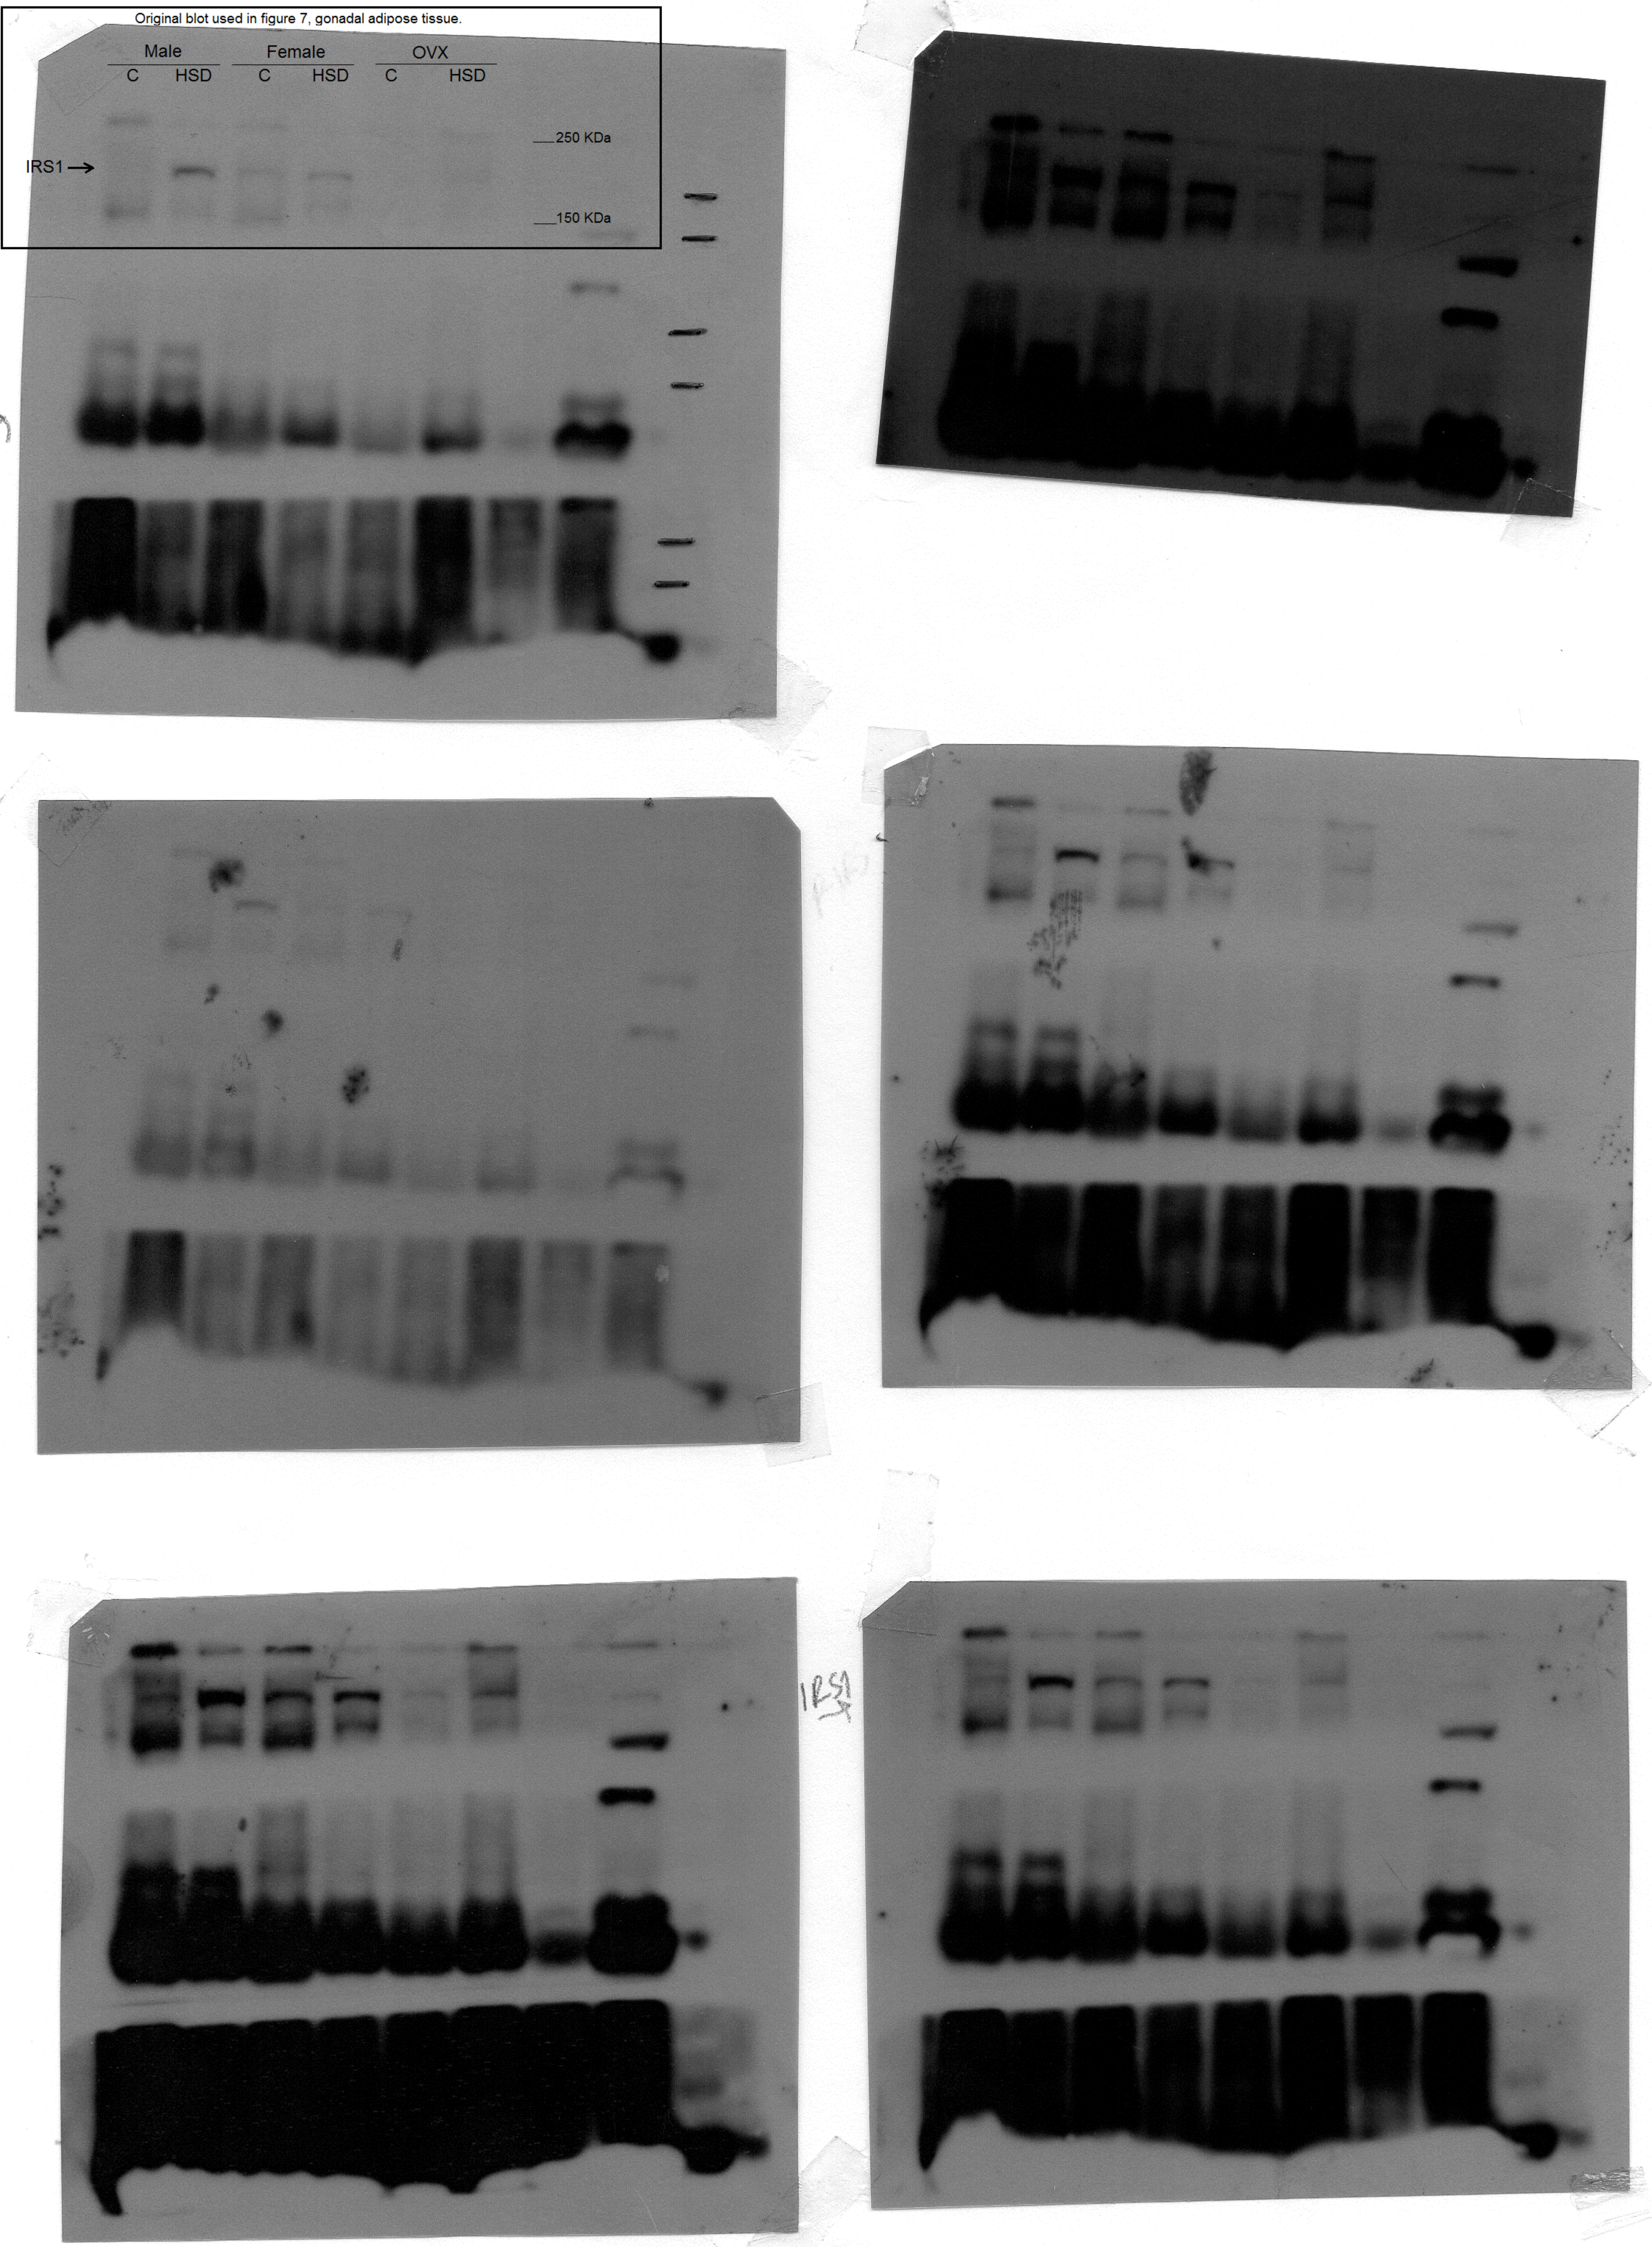

Supplement: supplementary_figure_7.pdf [file supplementary_figure_7.pdf]
