# Supplementary figures and images for: Sexual dimorphism in insulin resistance in a metabolic syndrome rat model
Source: PubMed Central journal article supplement — Endocr Connect. 2020 Aug 14;9(9):890–902. doi: 10.1530/EC-20-0288 (PMC7583132; doi:10.1530/ec-20-0288), 2020-08-14

176

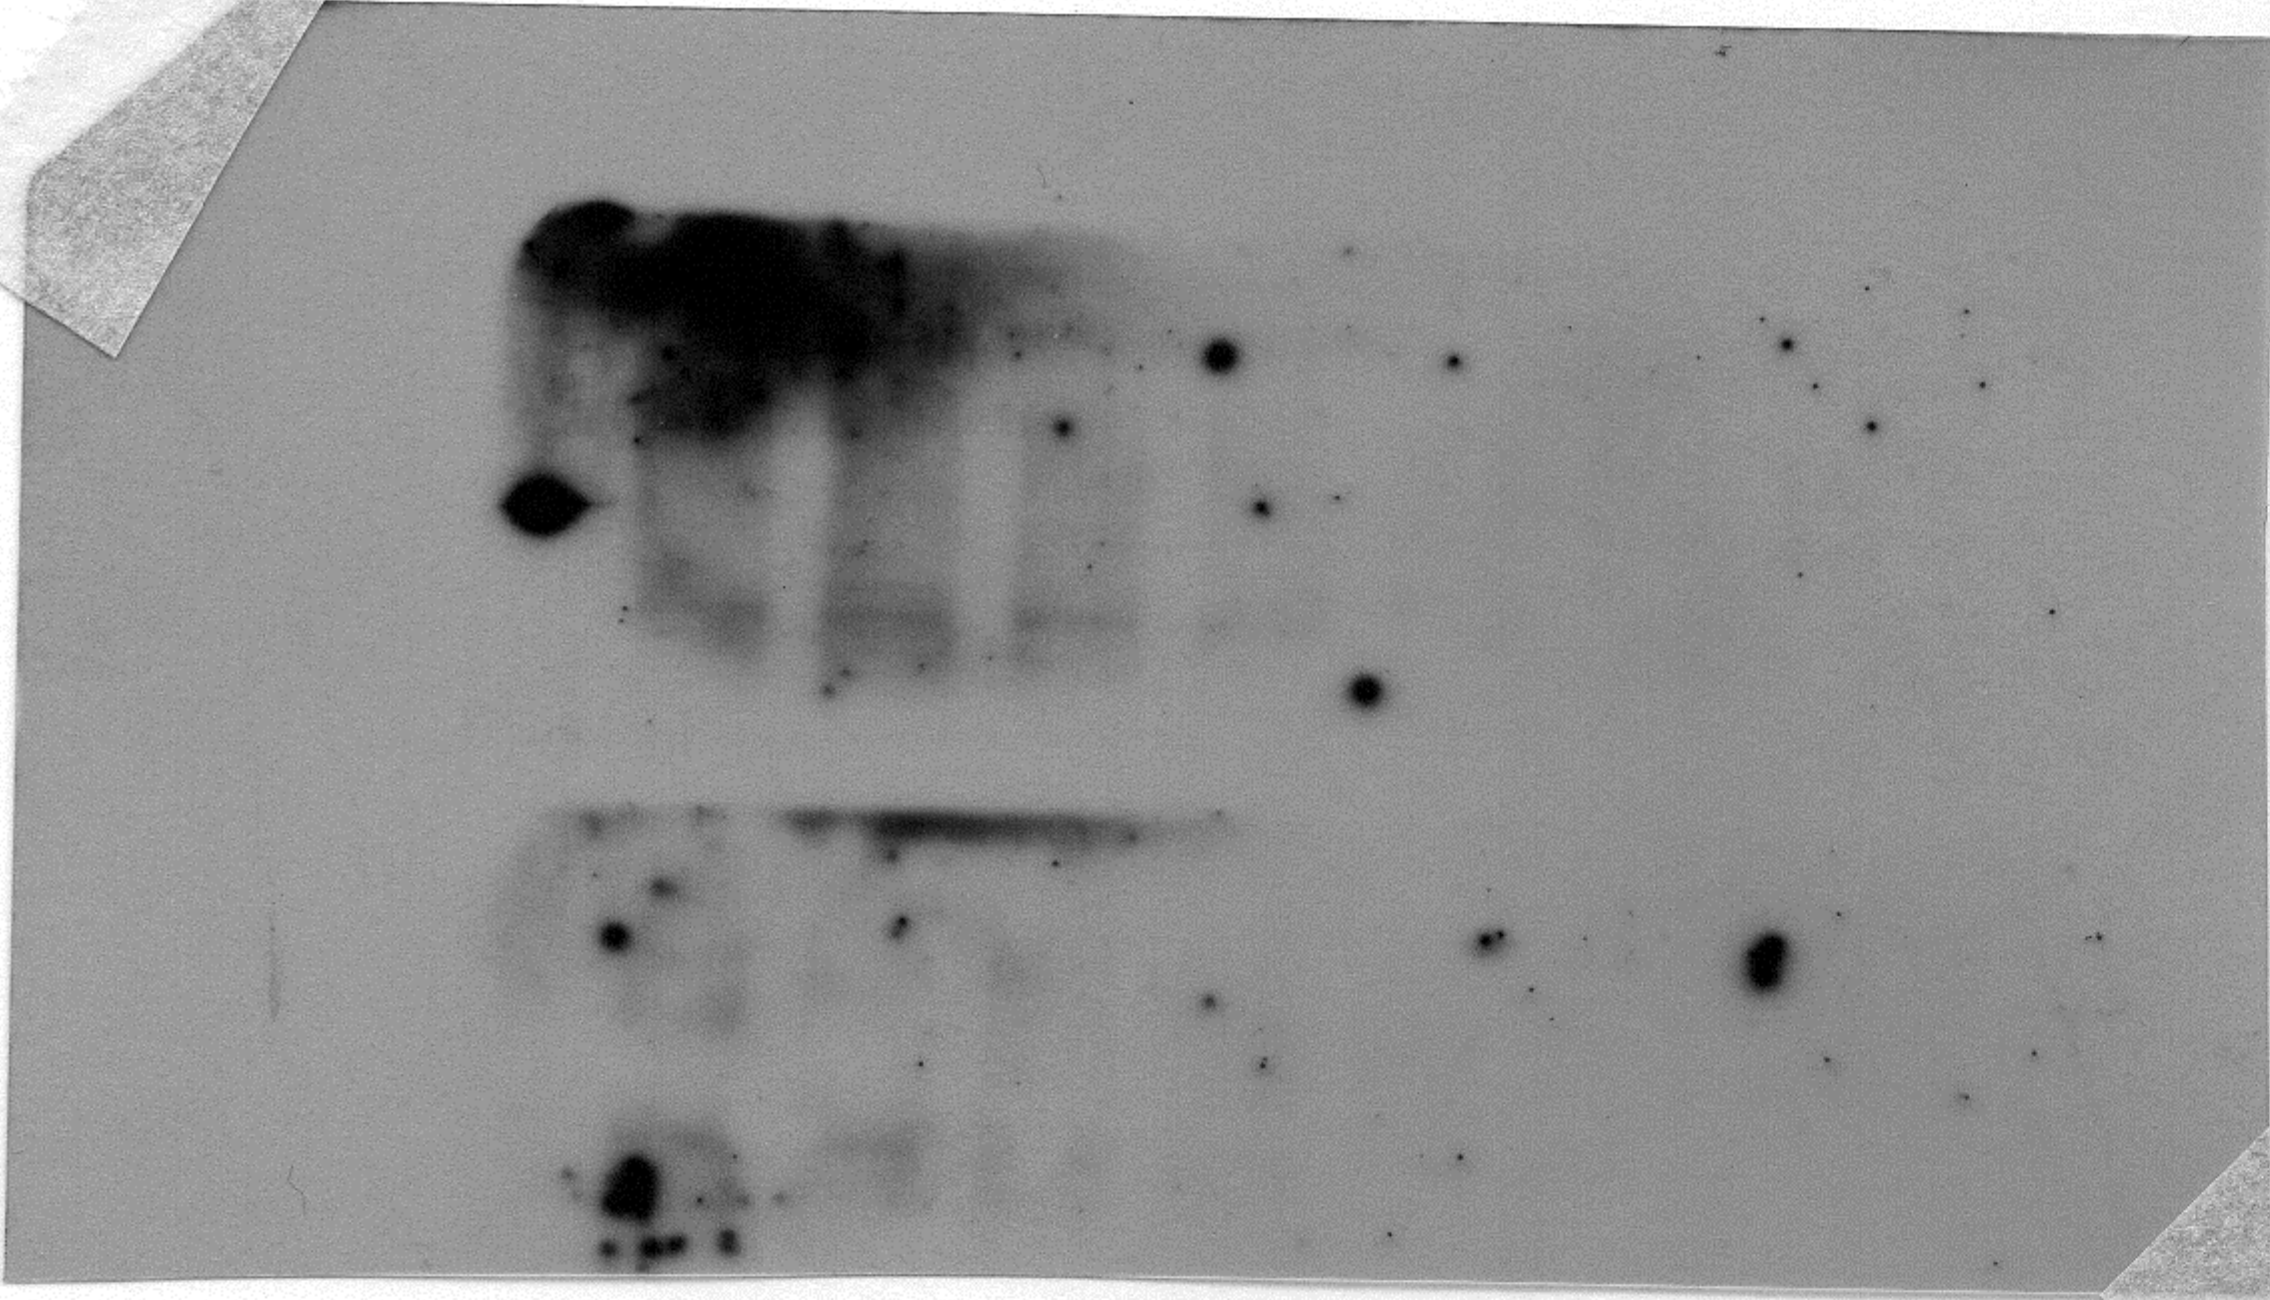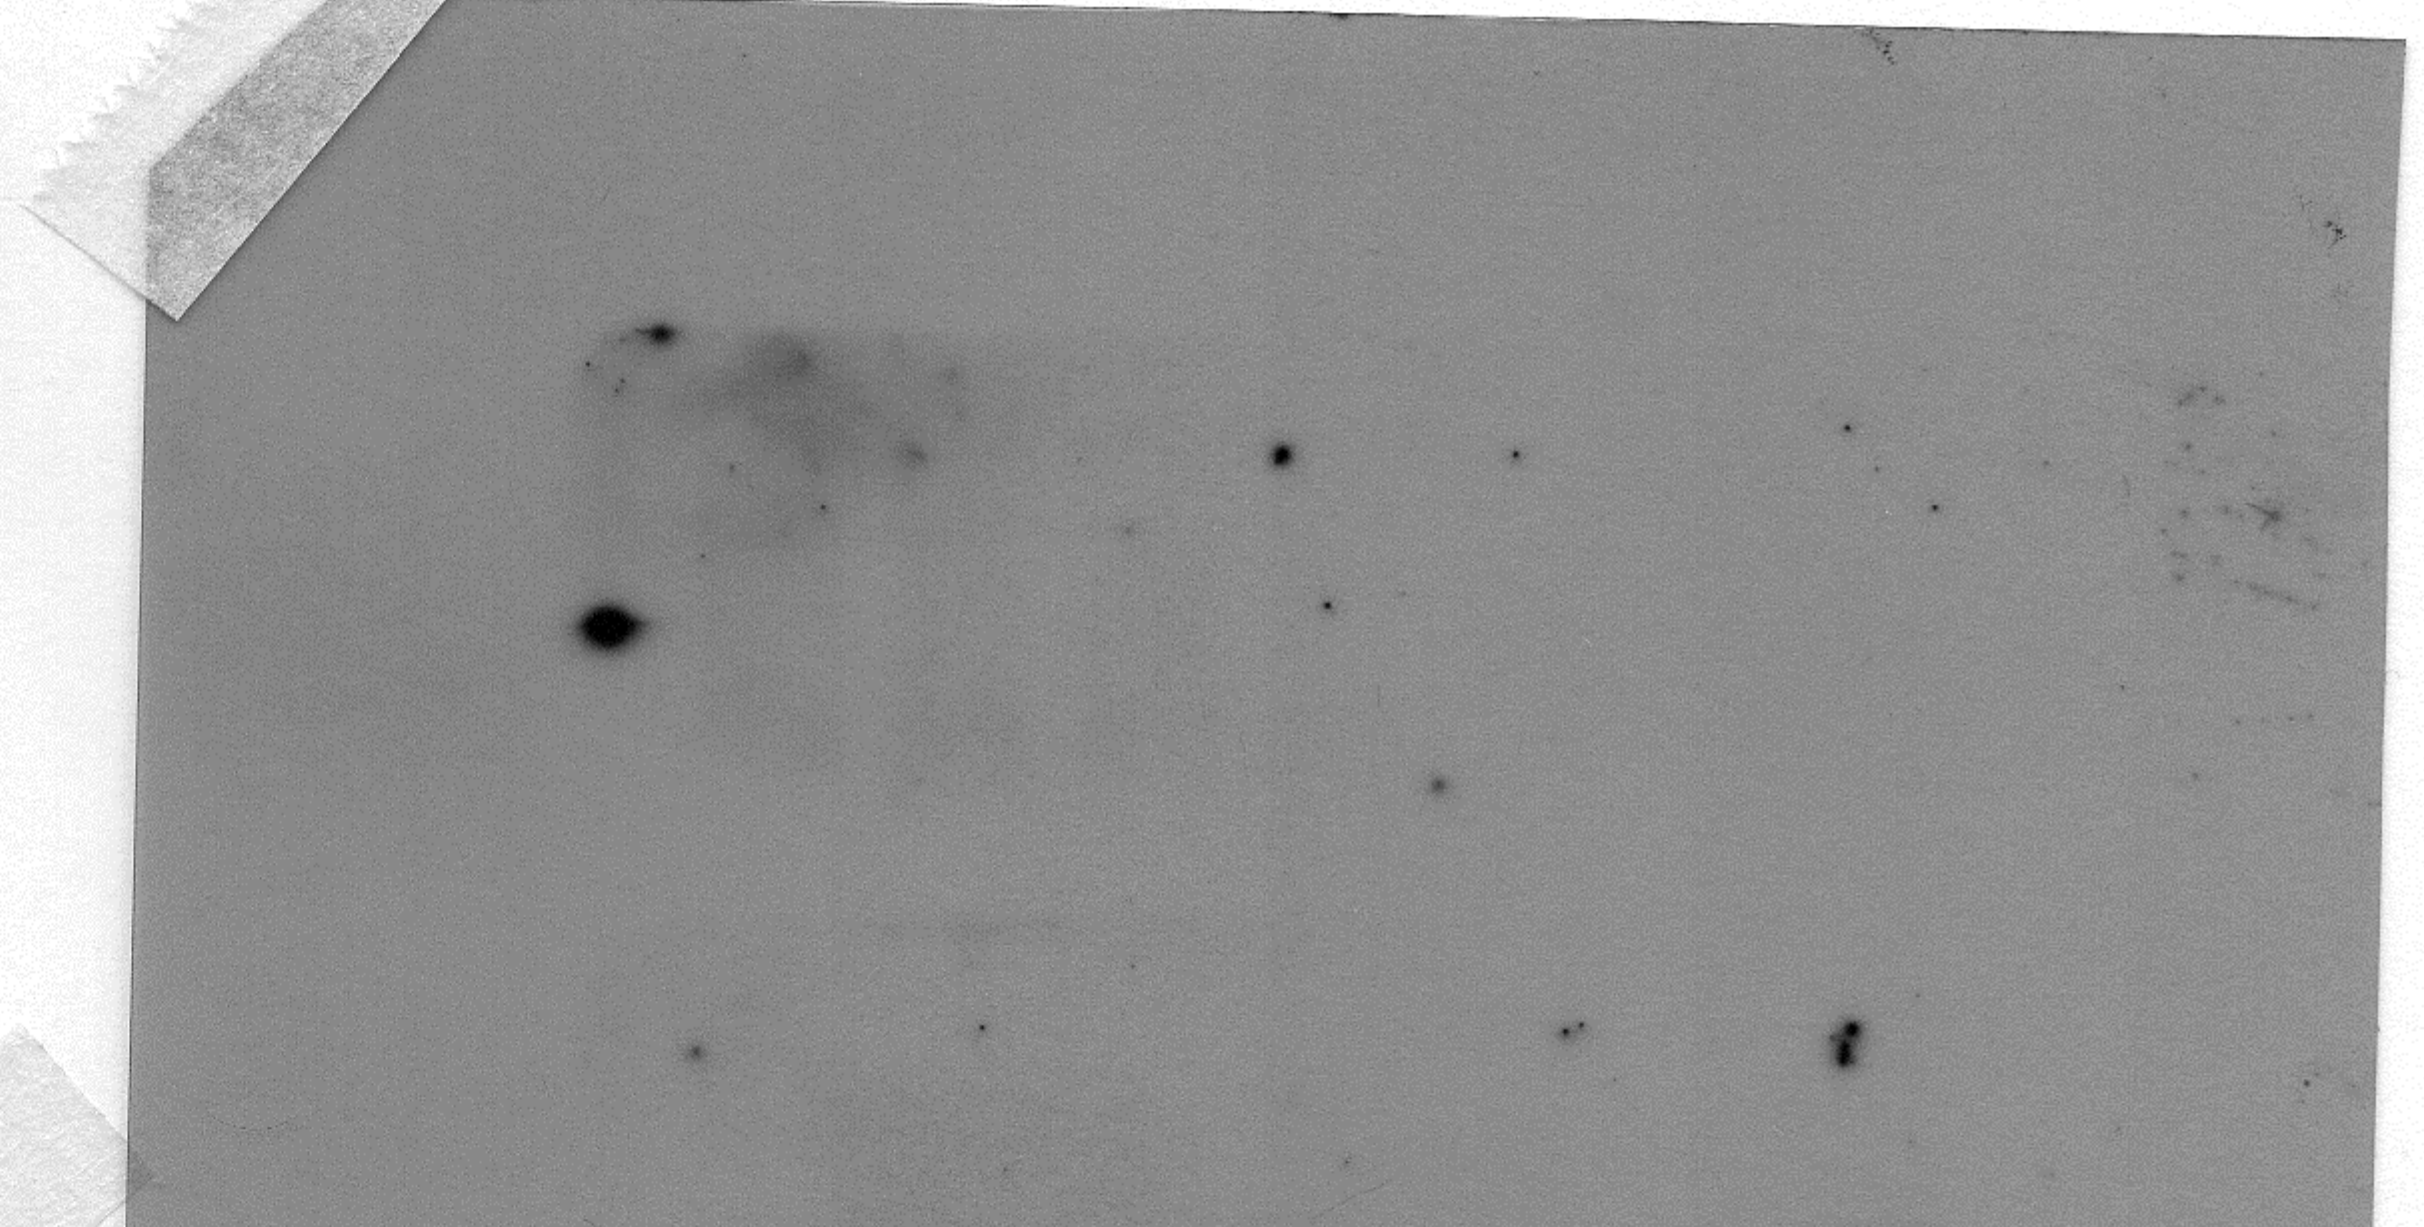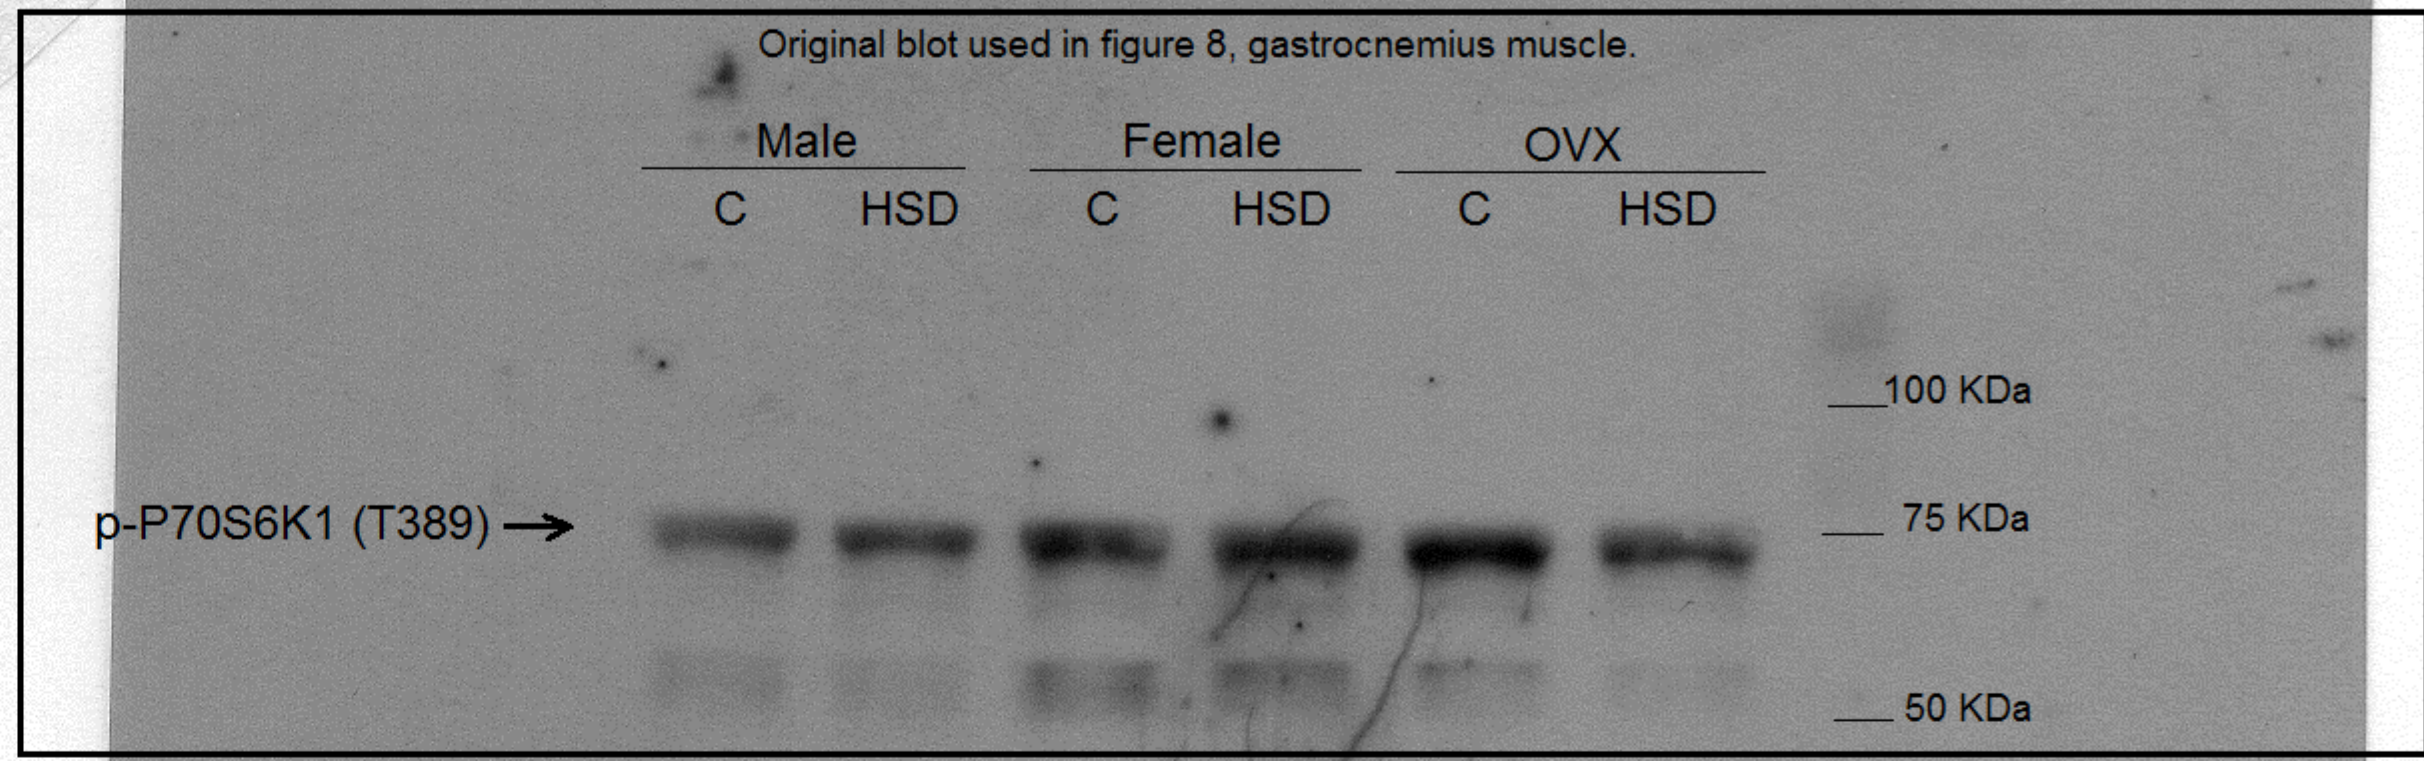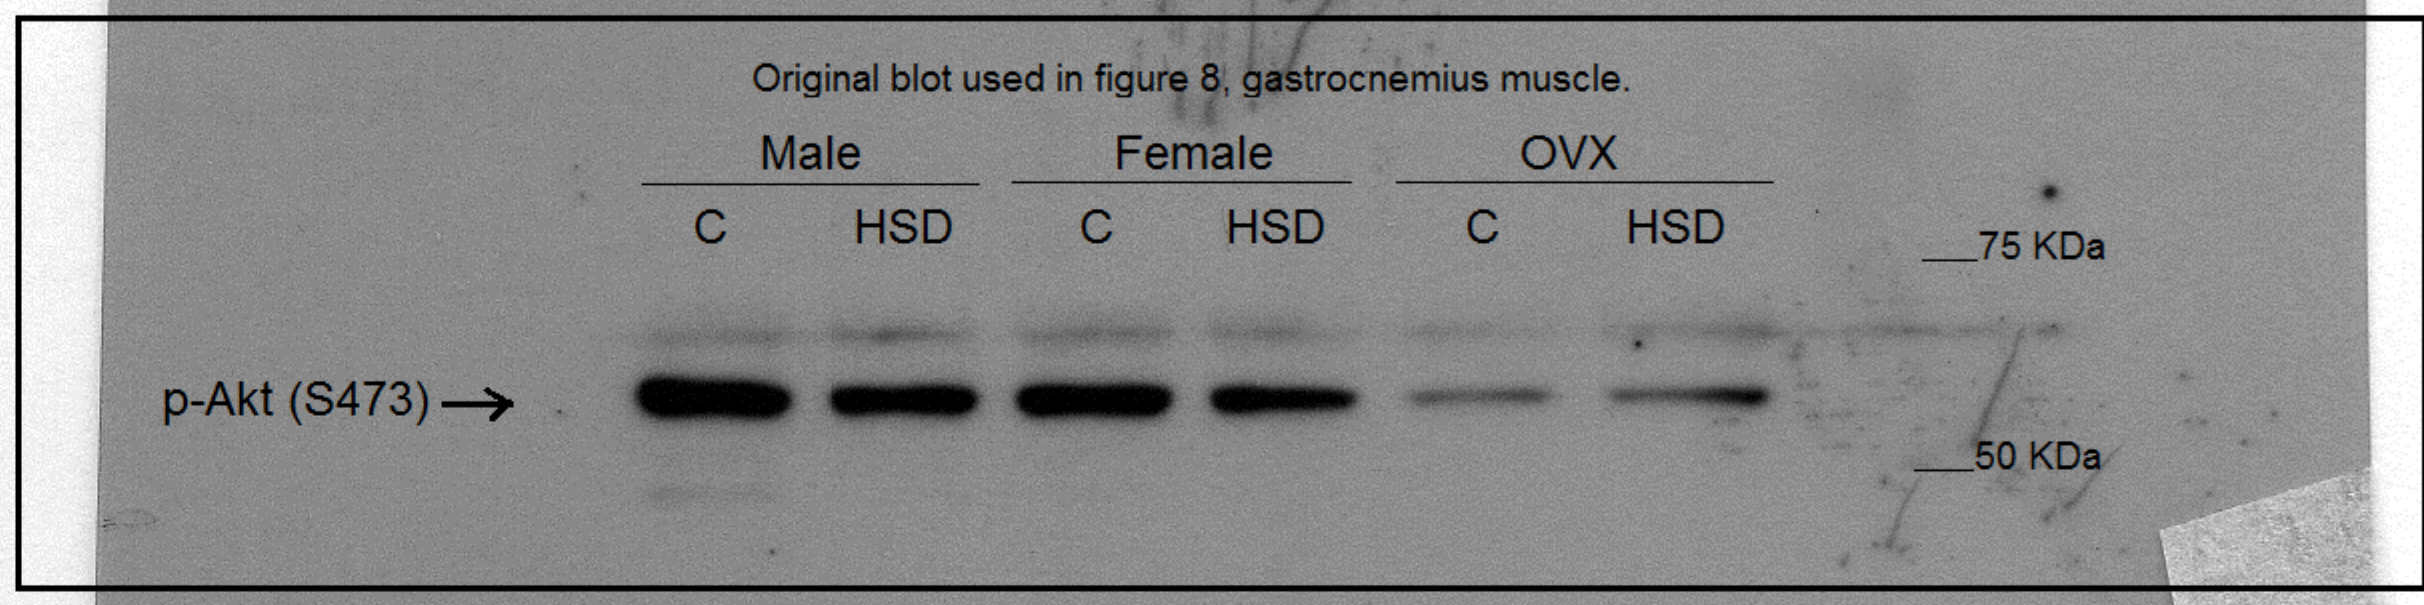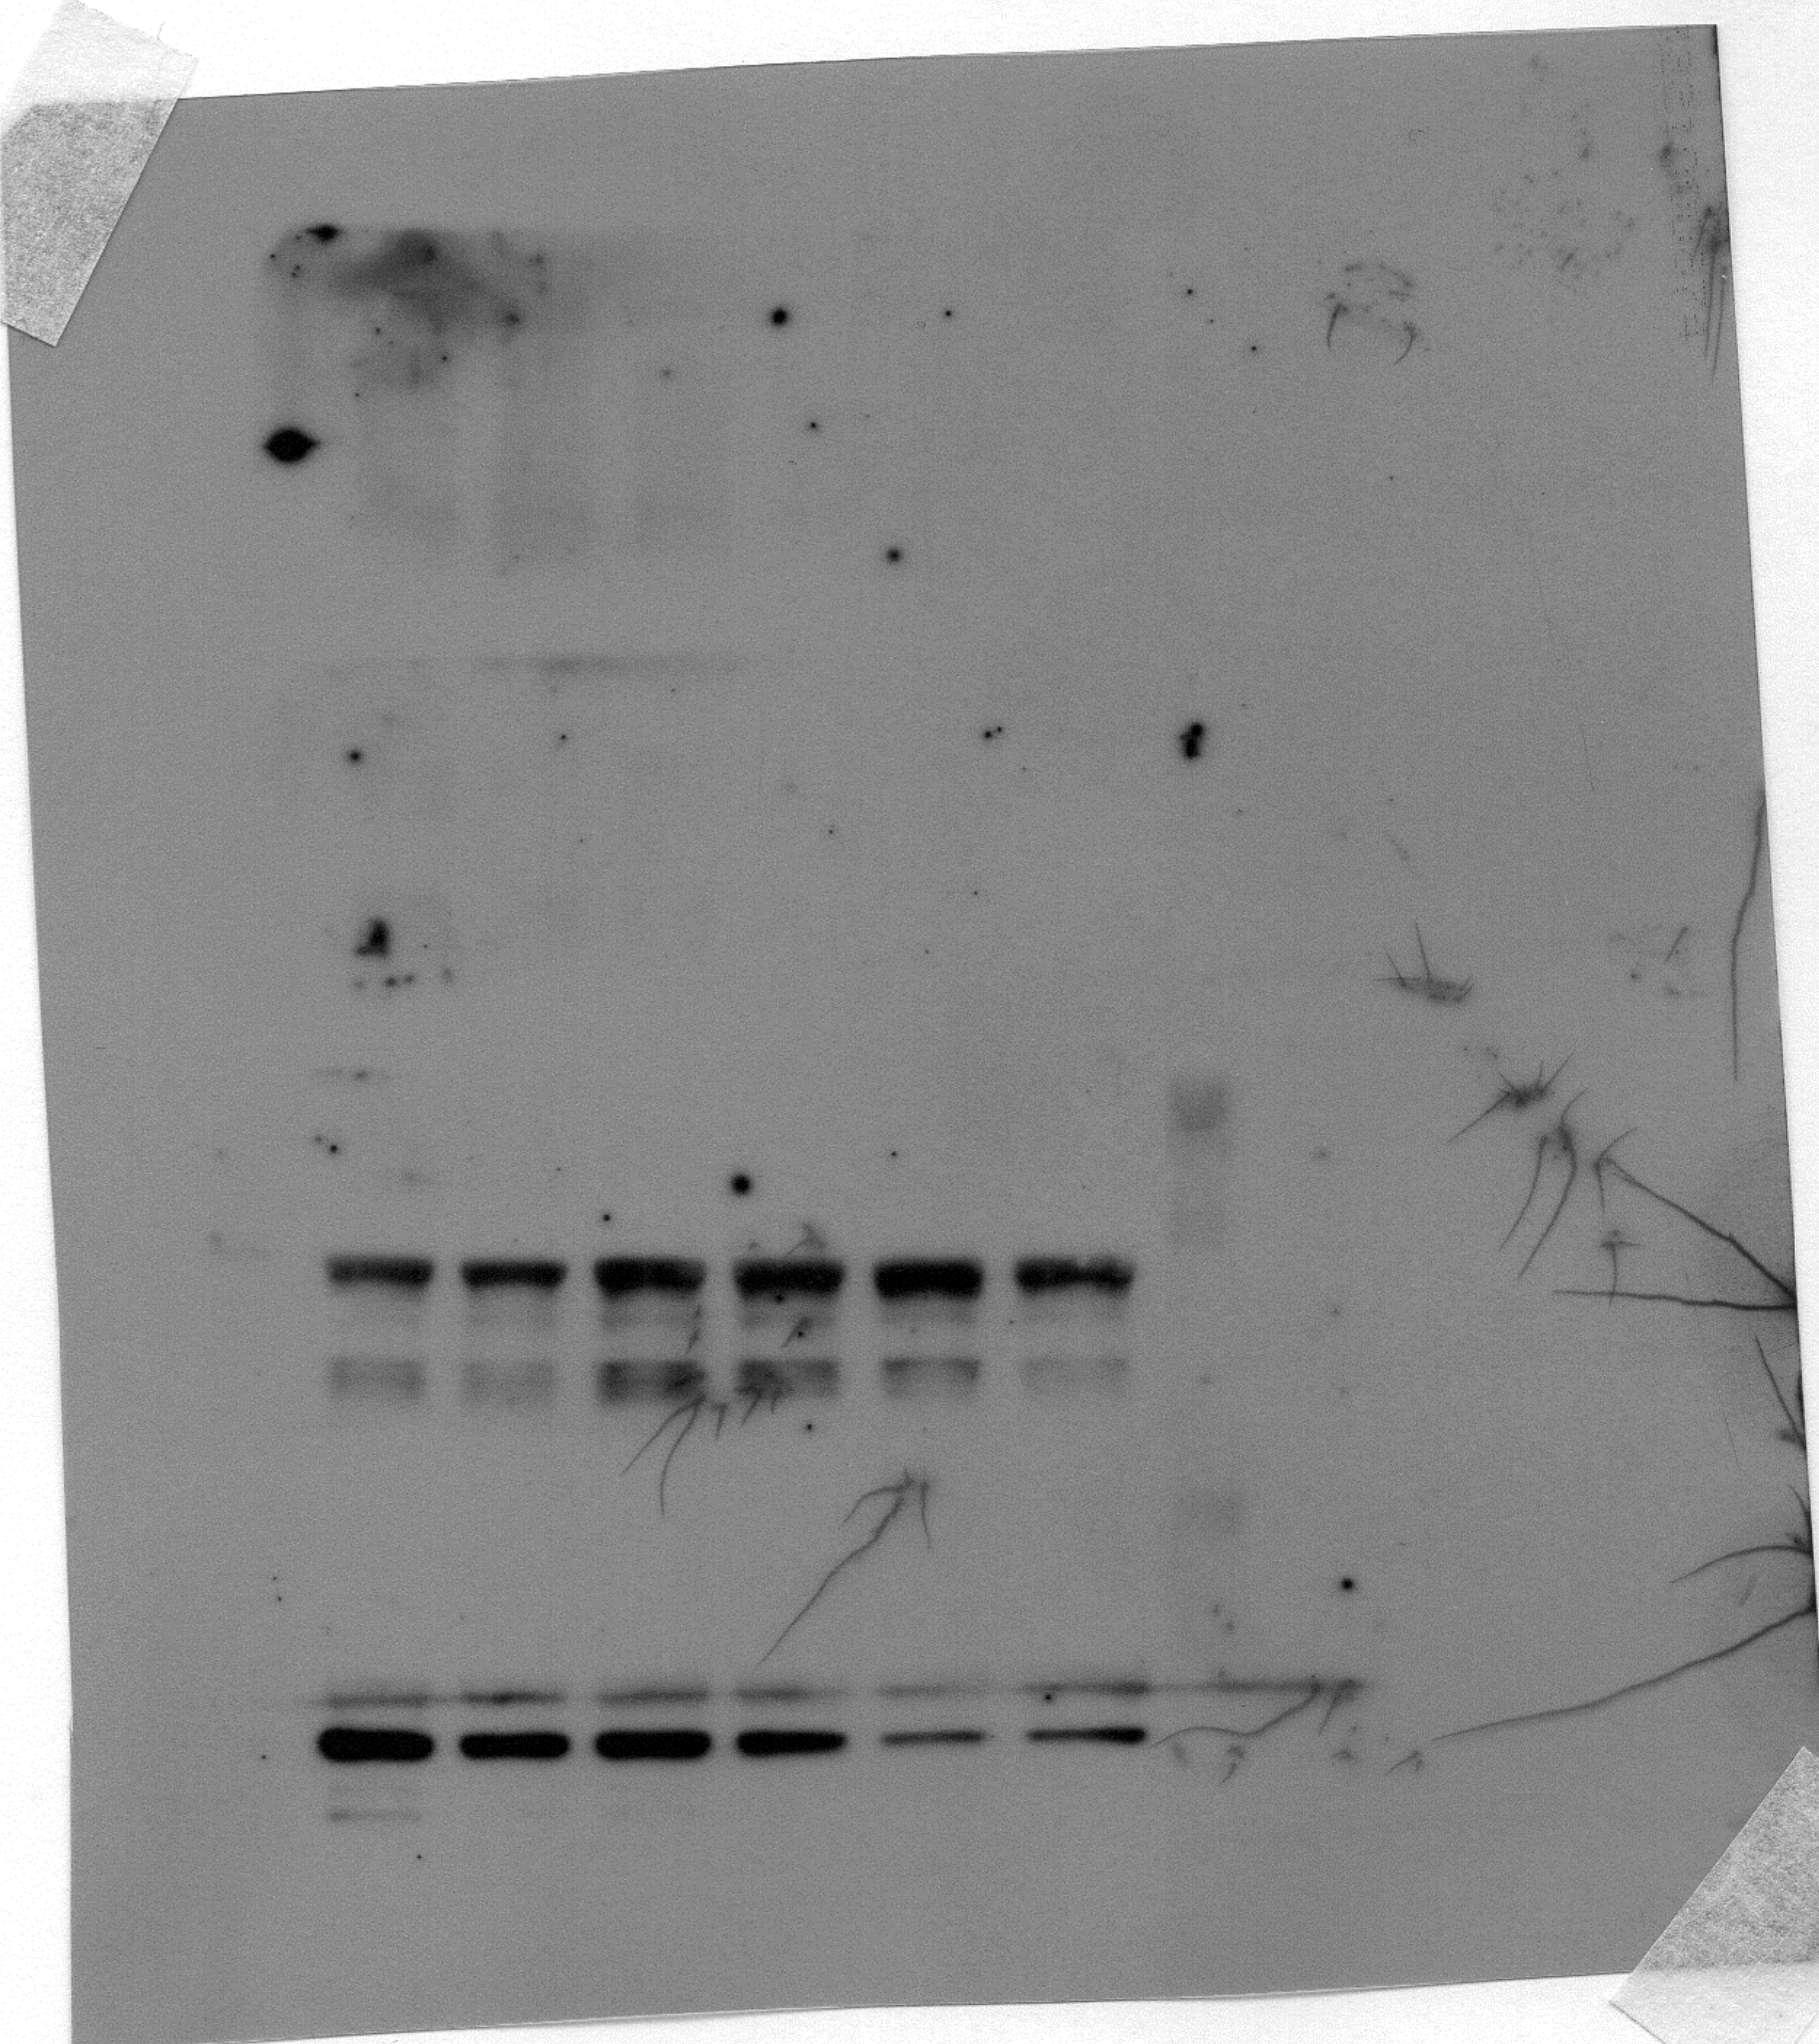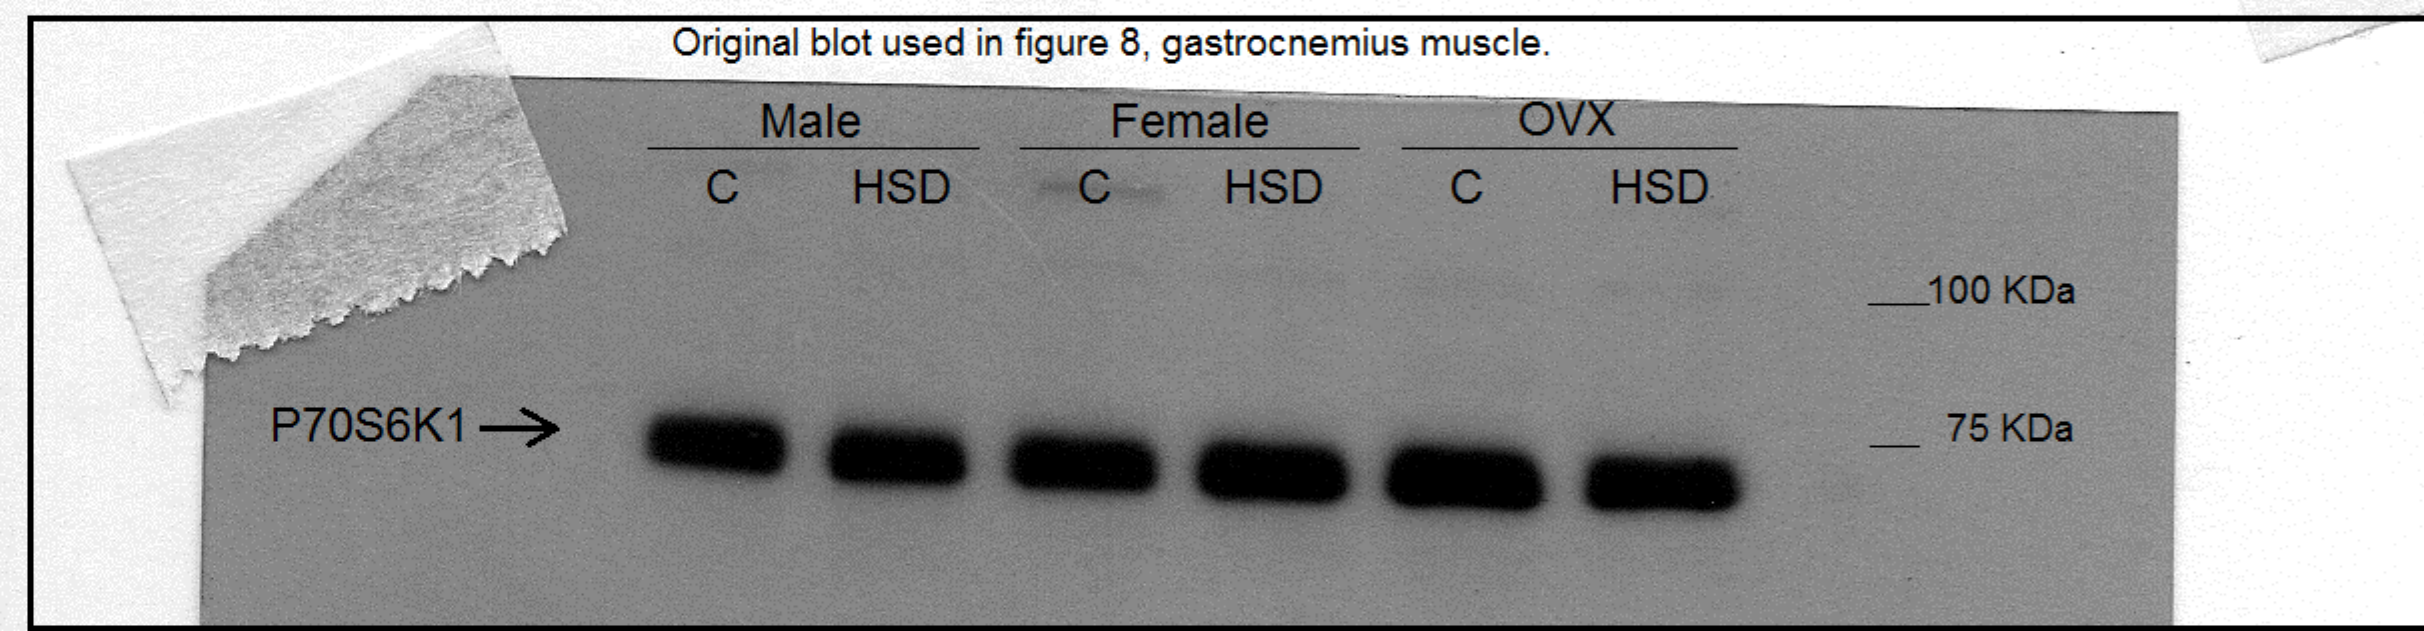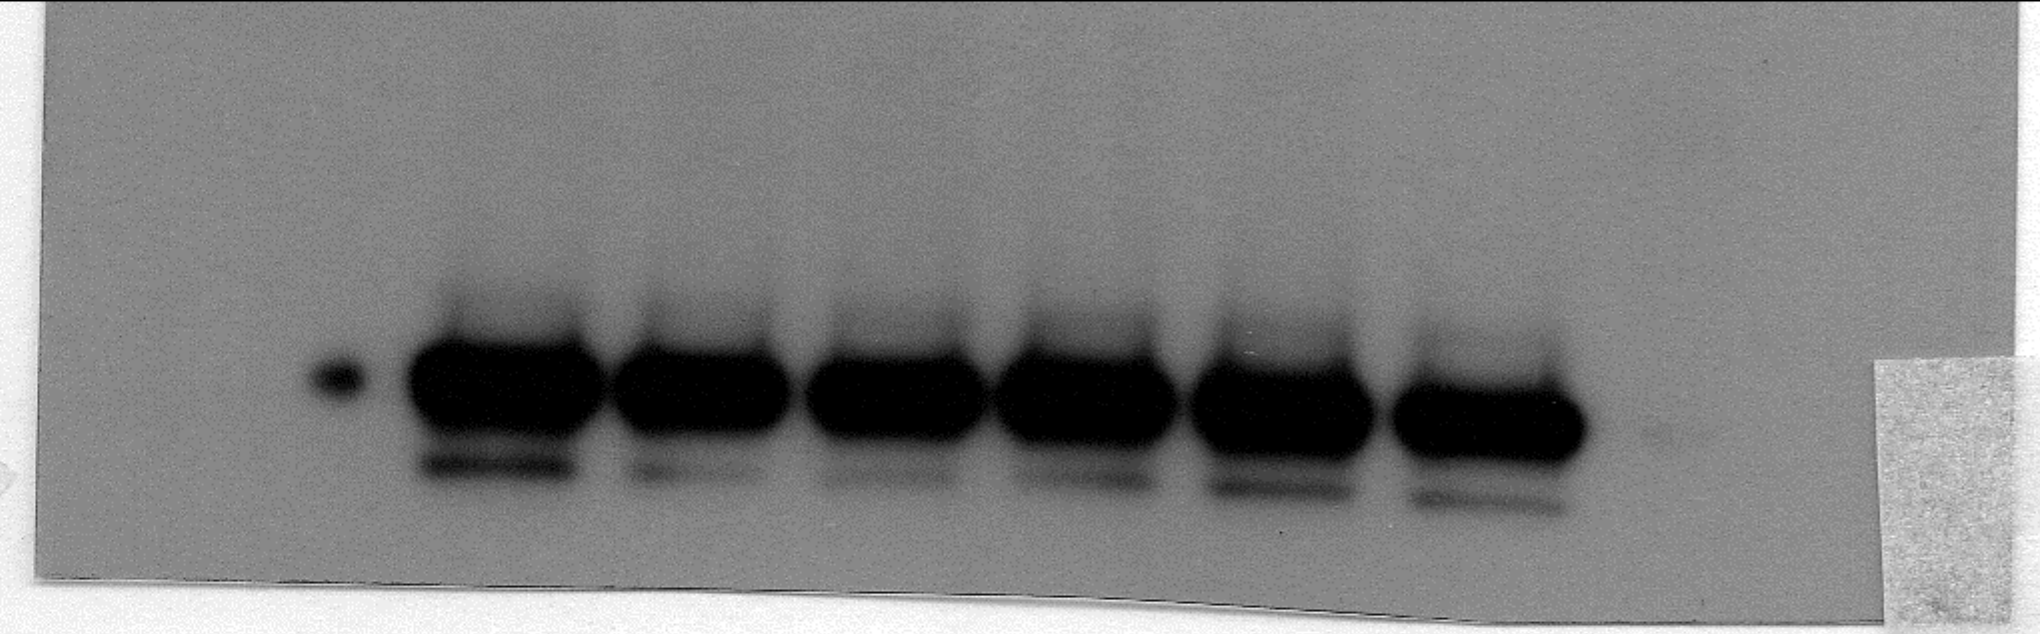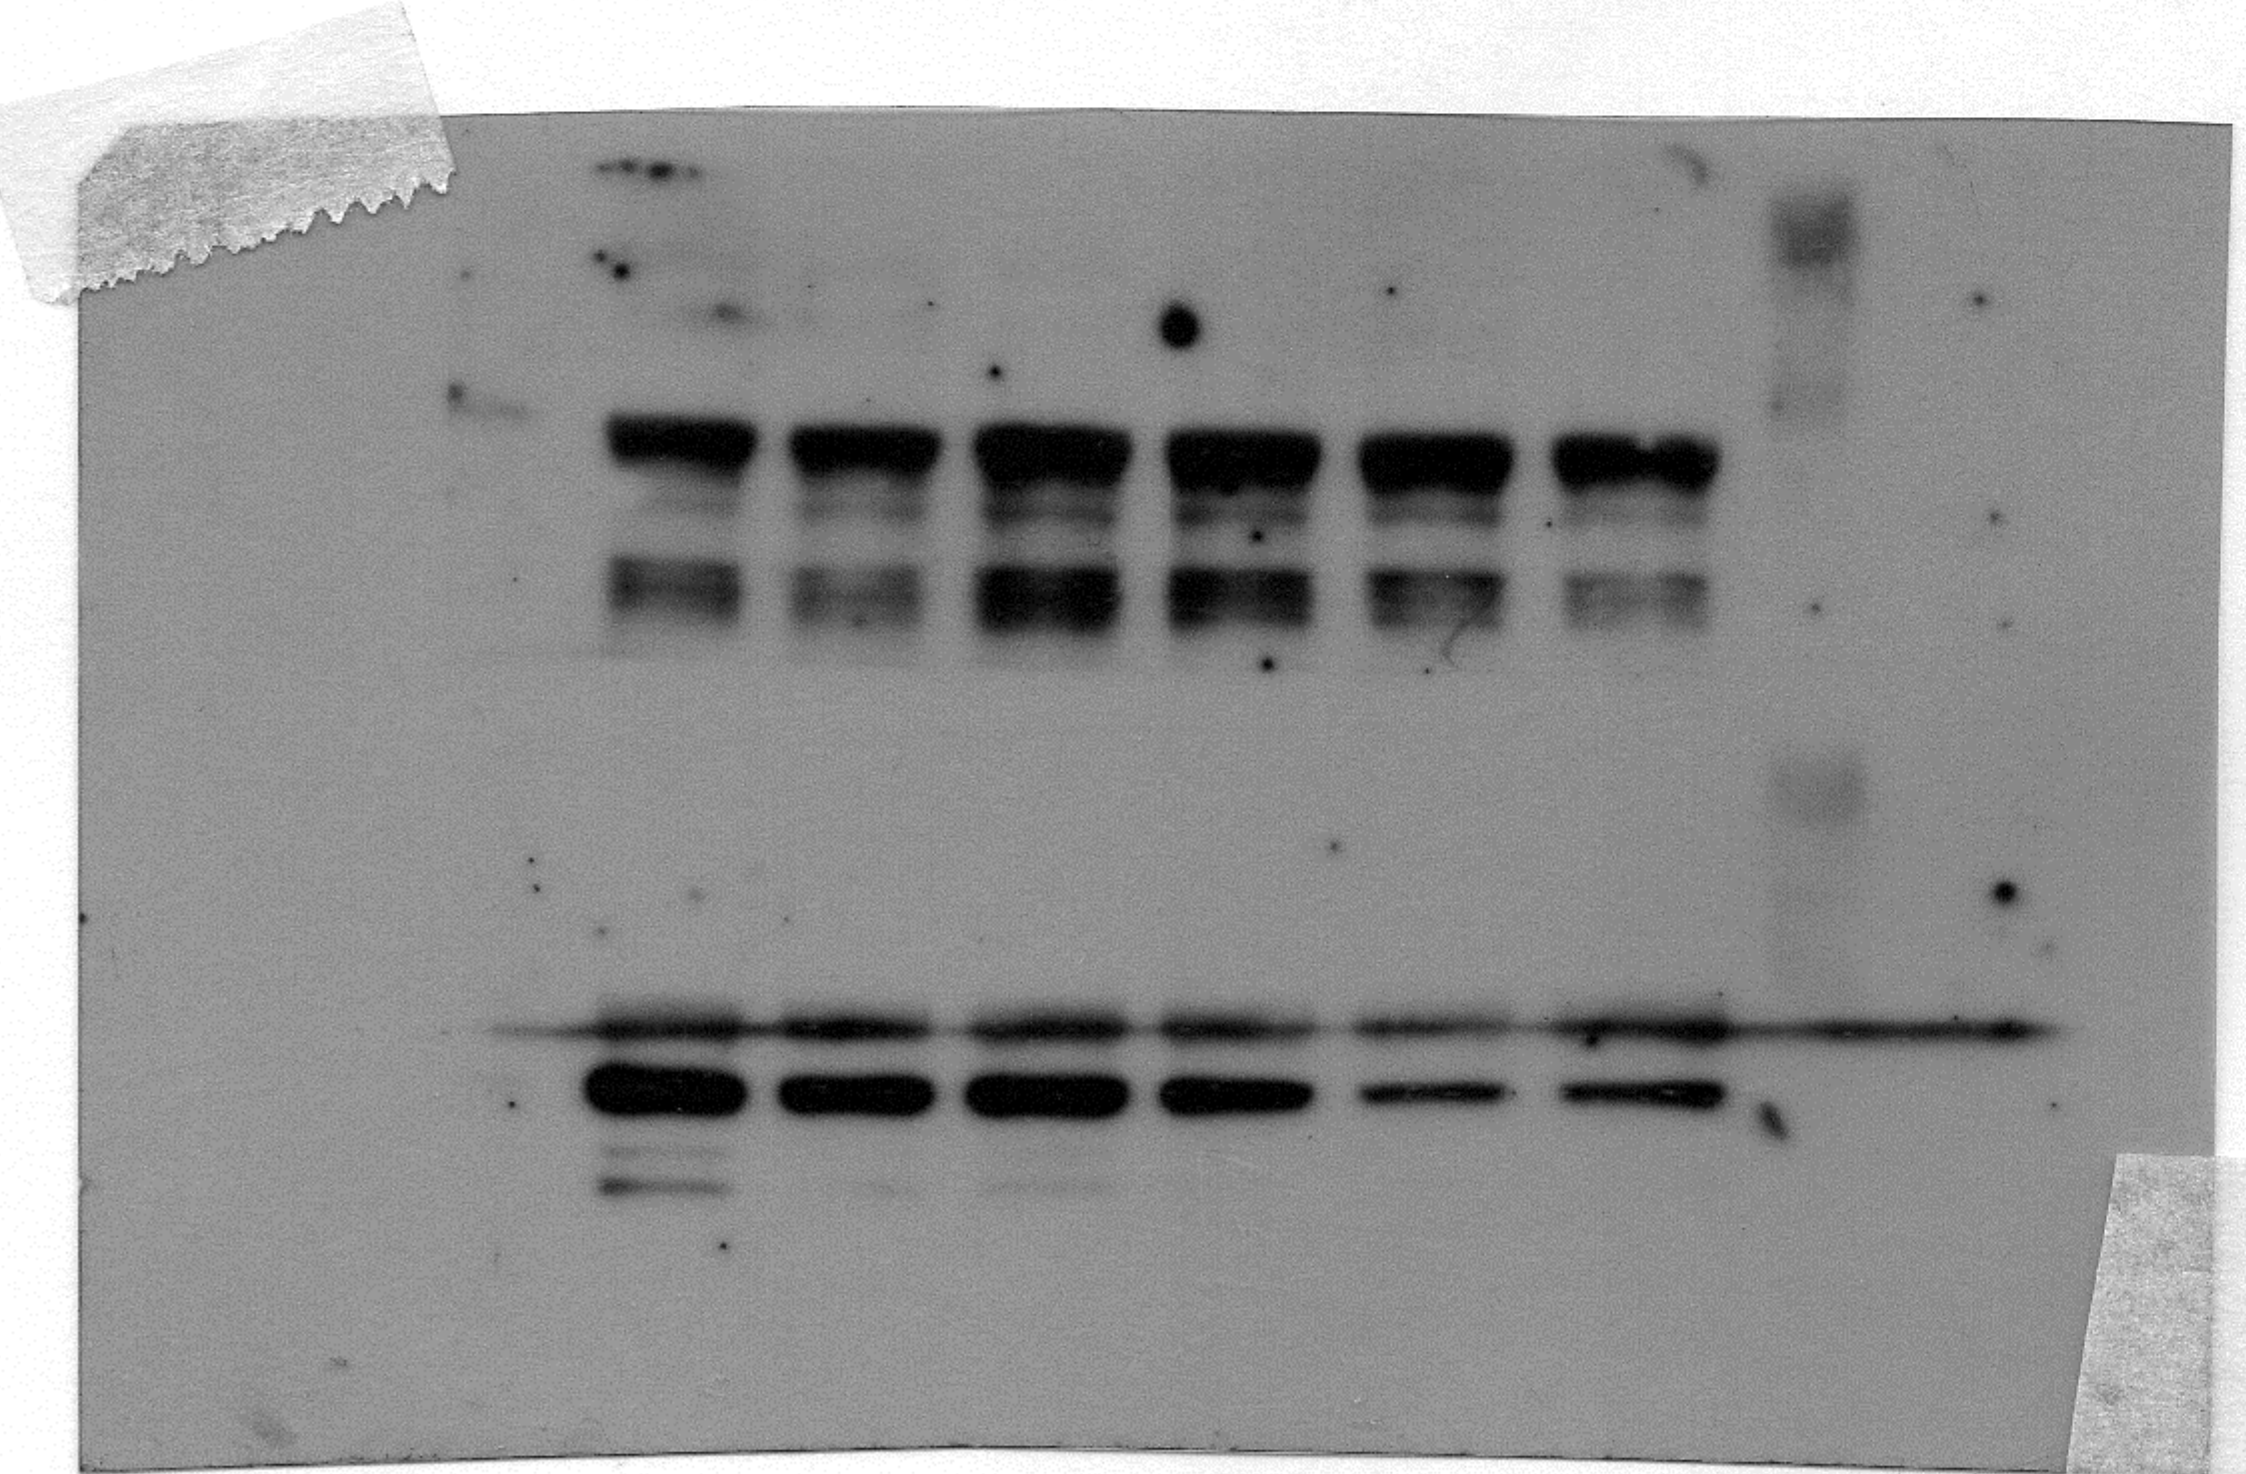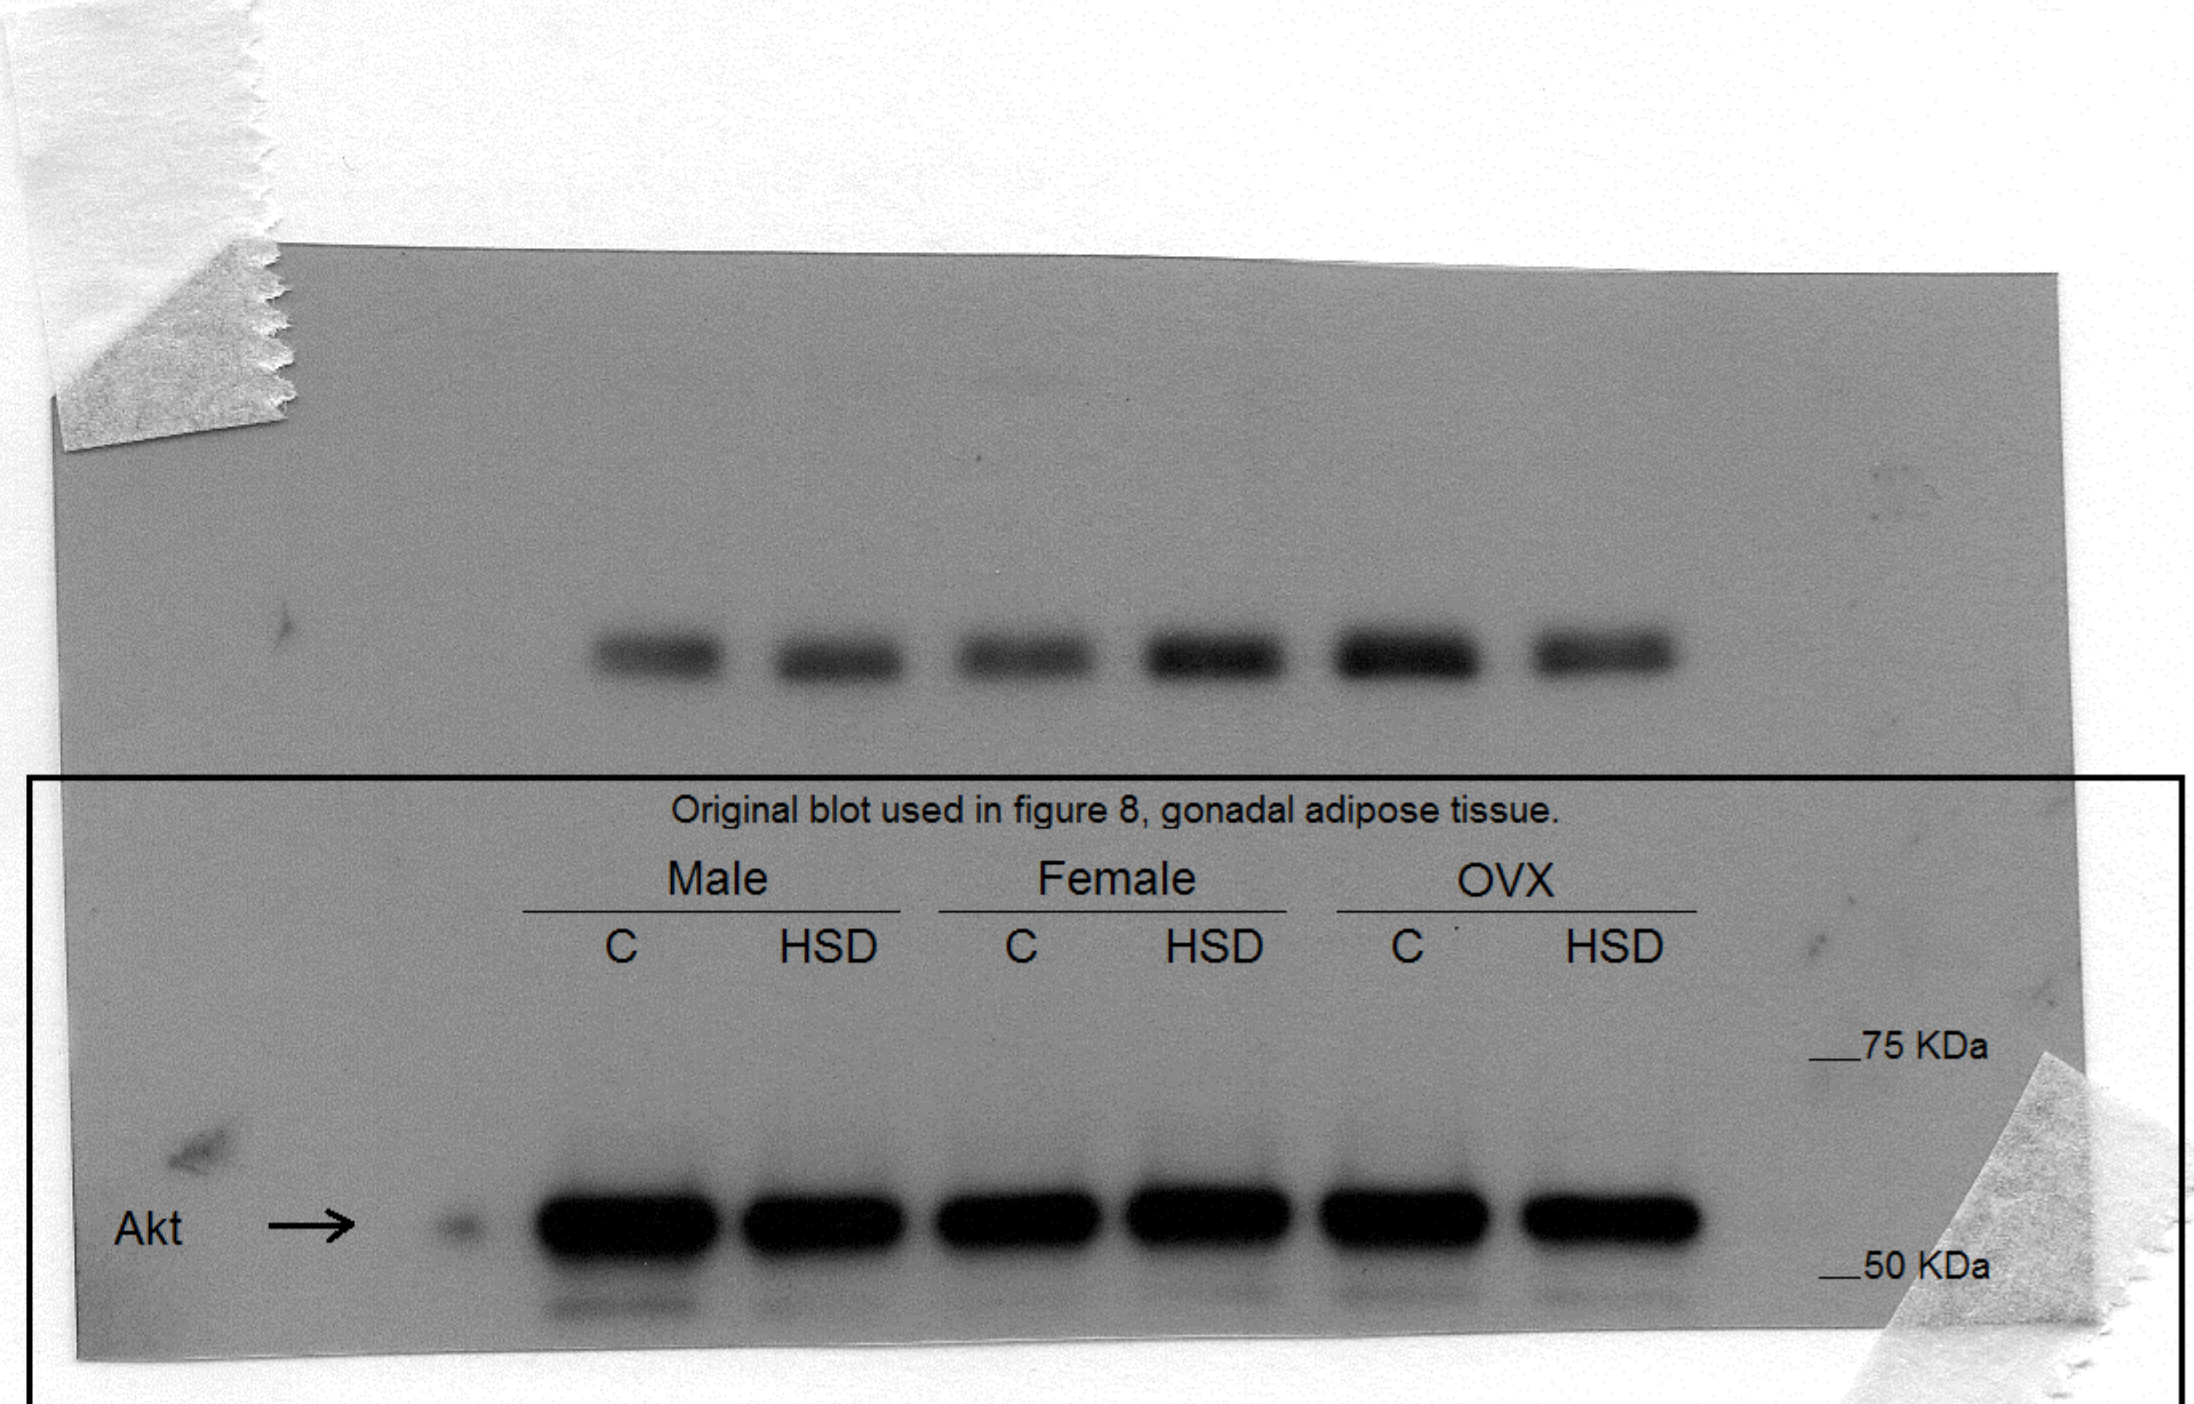

21 Feb 18

Supplement: supplementary_figure_10.pdf [file supplementary_figure_10.pdf]

012415300993

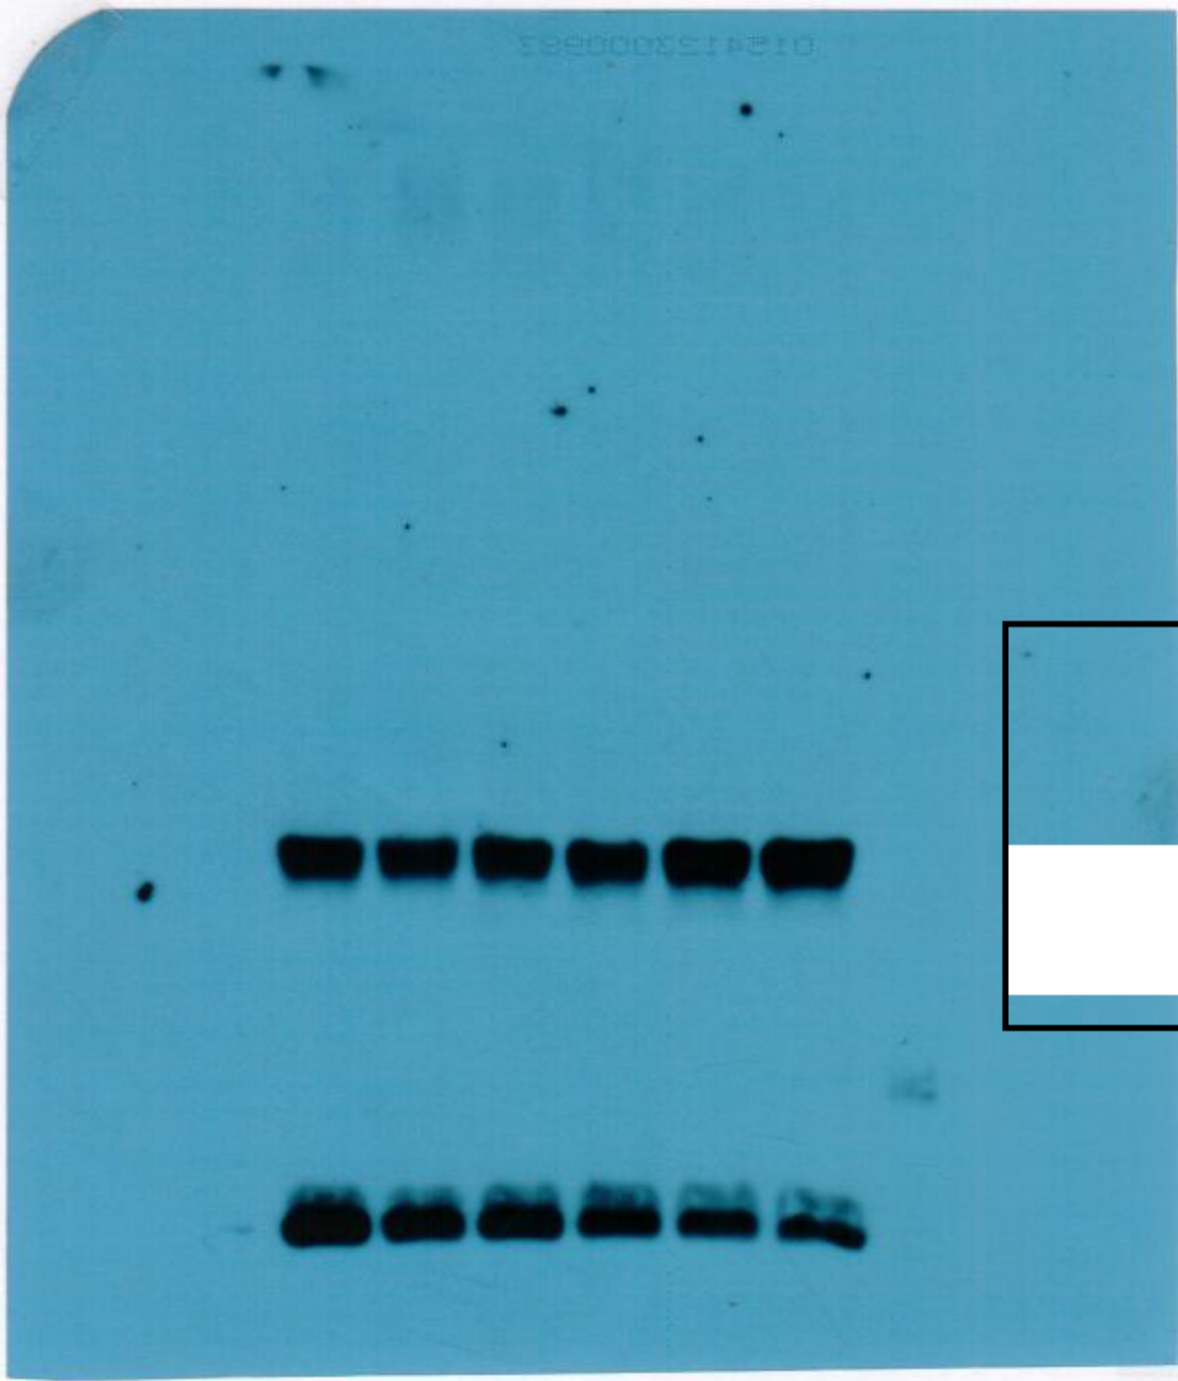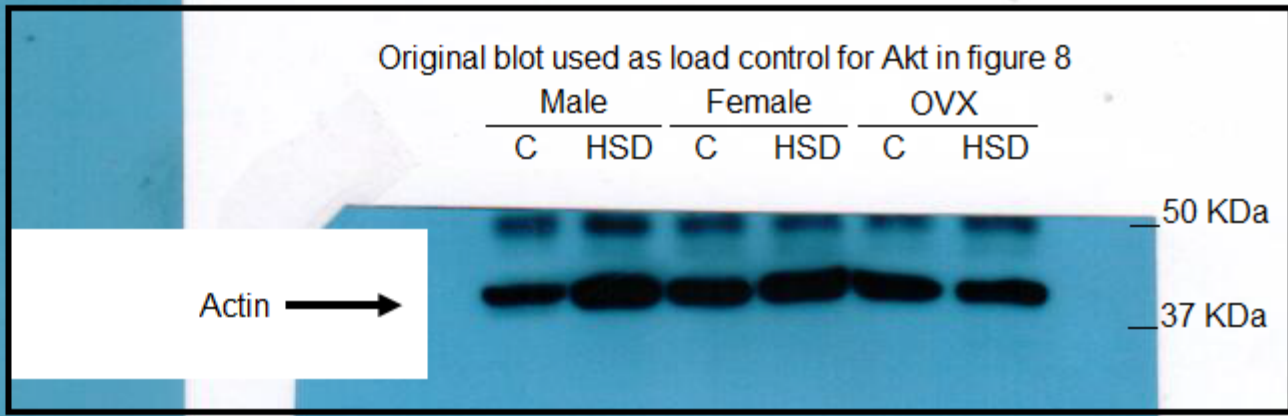

Supplement: supplementary_figure_12.pdf [file supplementary_figure_12.pdf]

# IRS1 Gonadal white adipose tissue (gWAT)

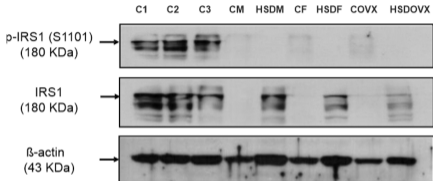

Supplement: supplementary_figure_2.pdf [file supplementary_figure_2.pdf]

TAP

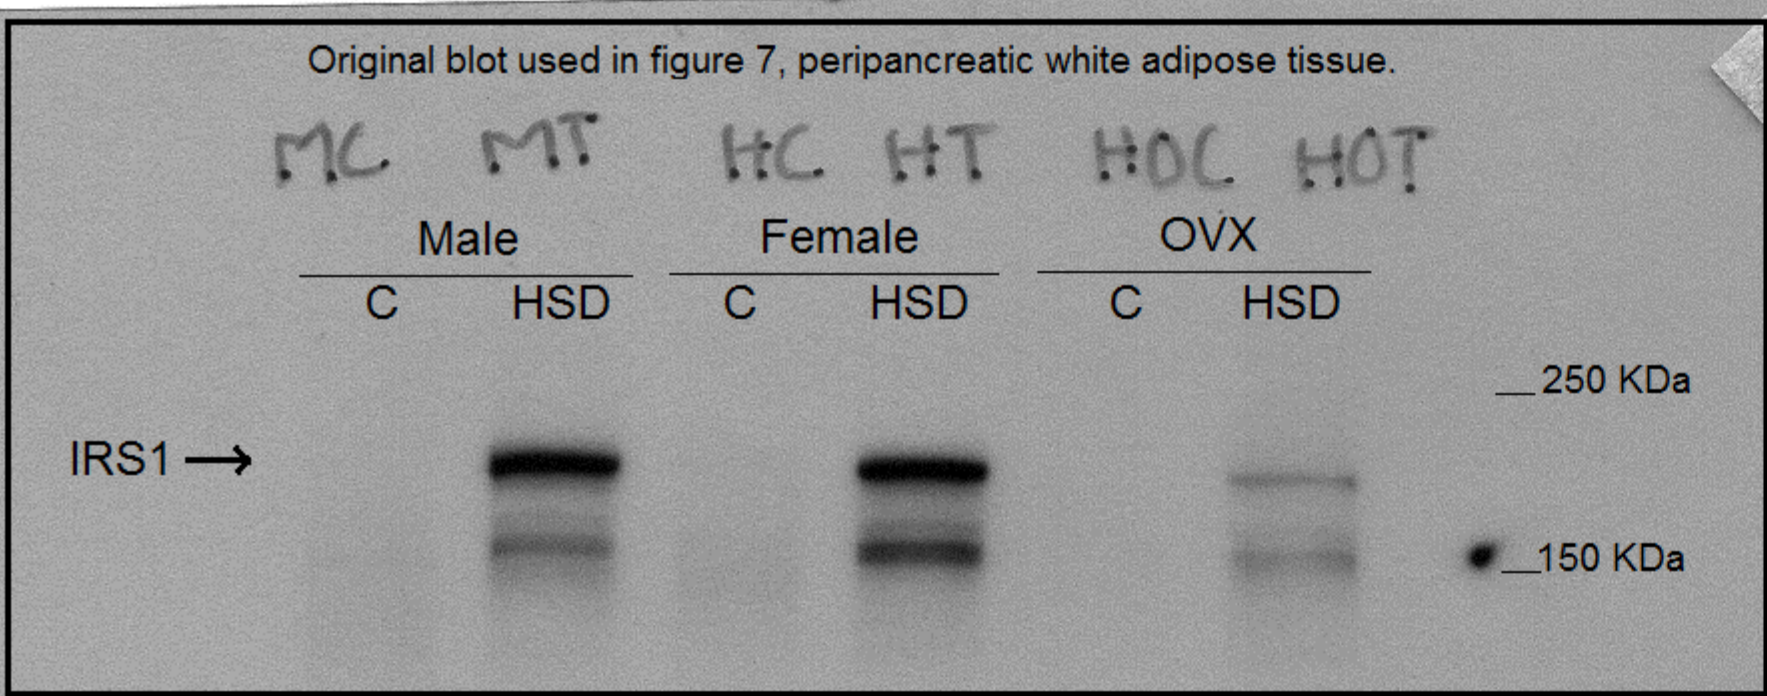

IRS1

IRS1

SGK1

AKT1

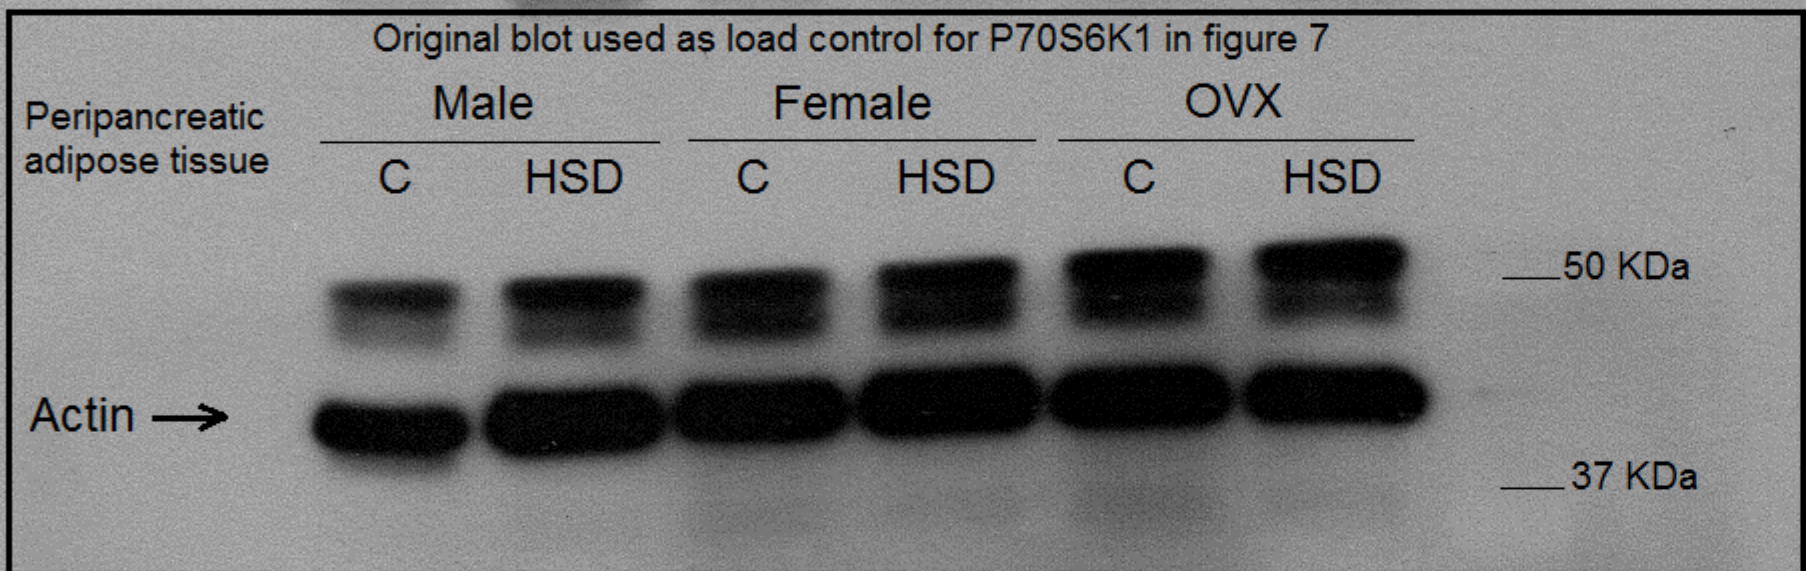

act1

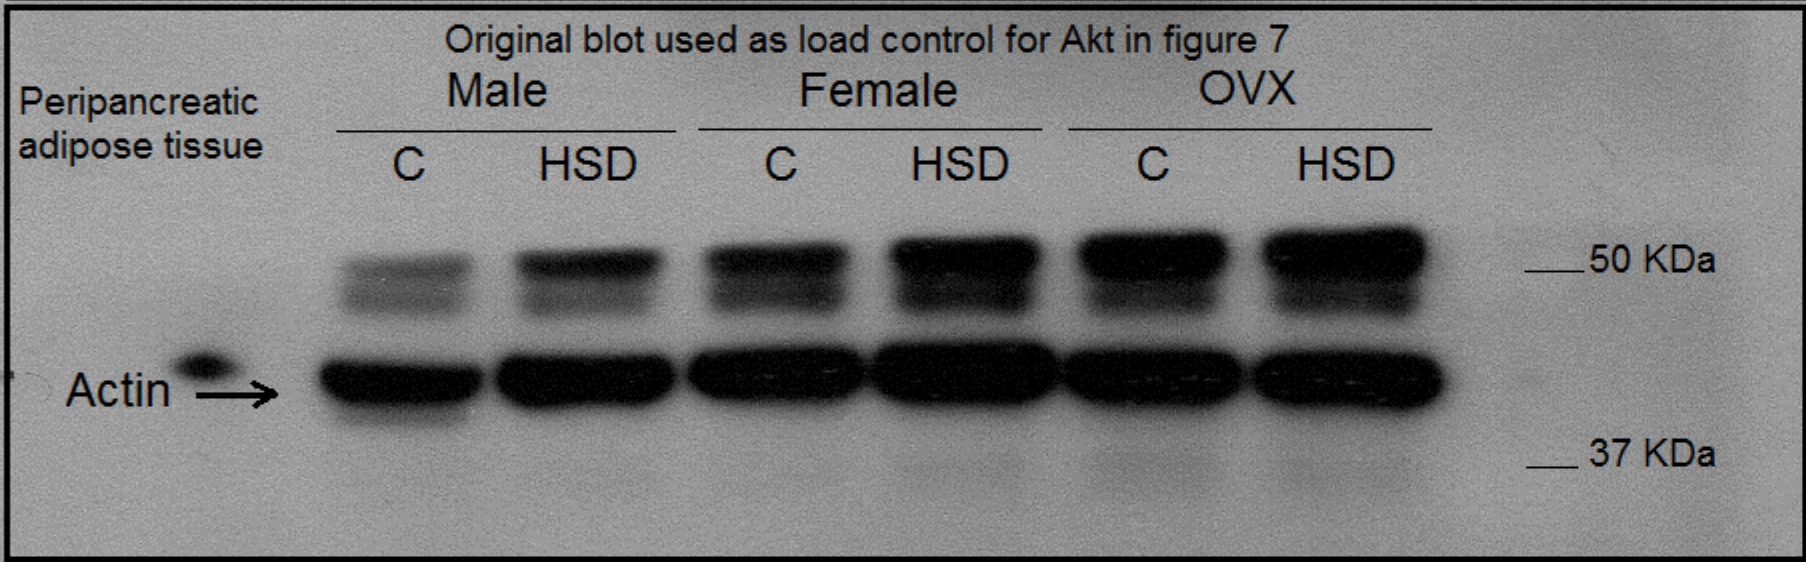

act2

act3

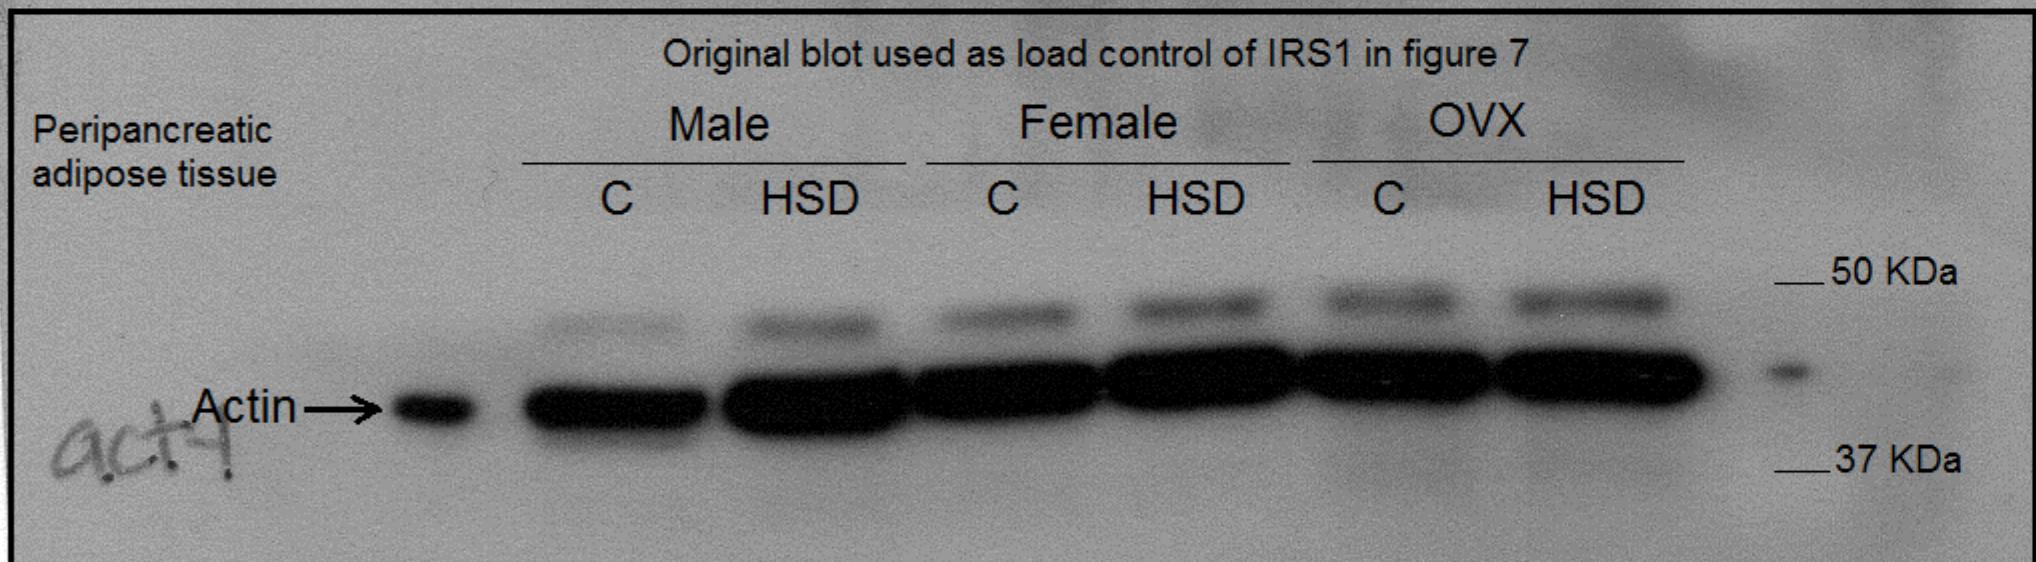

act4

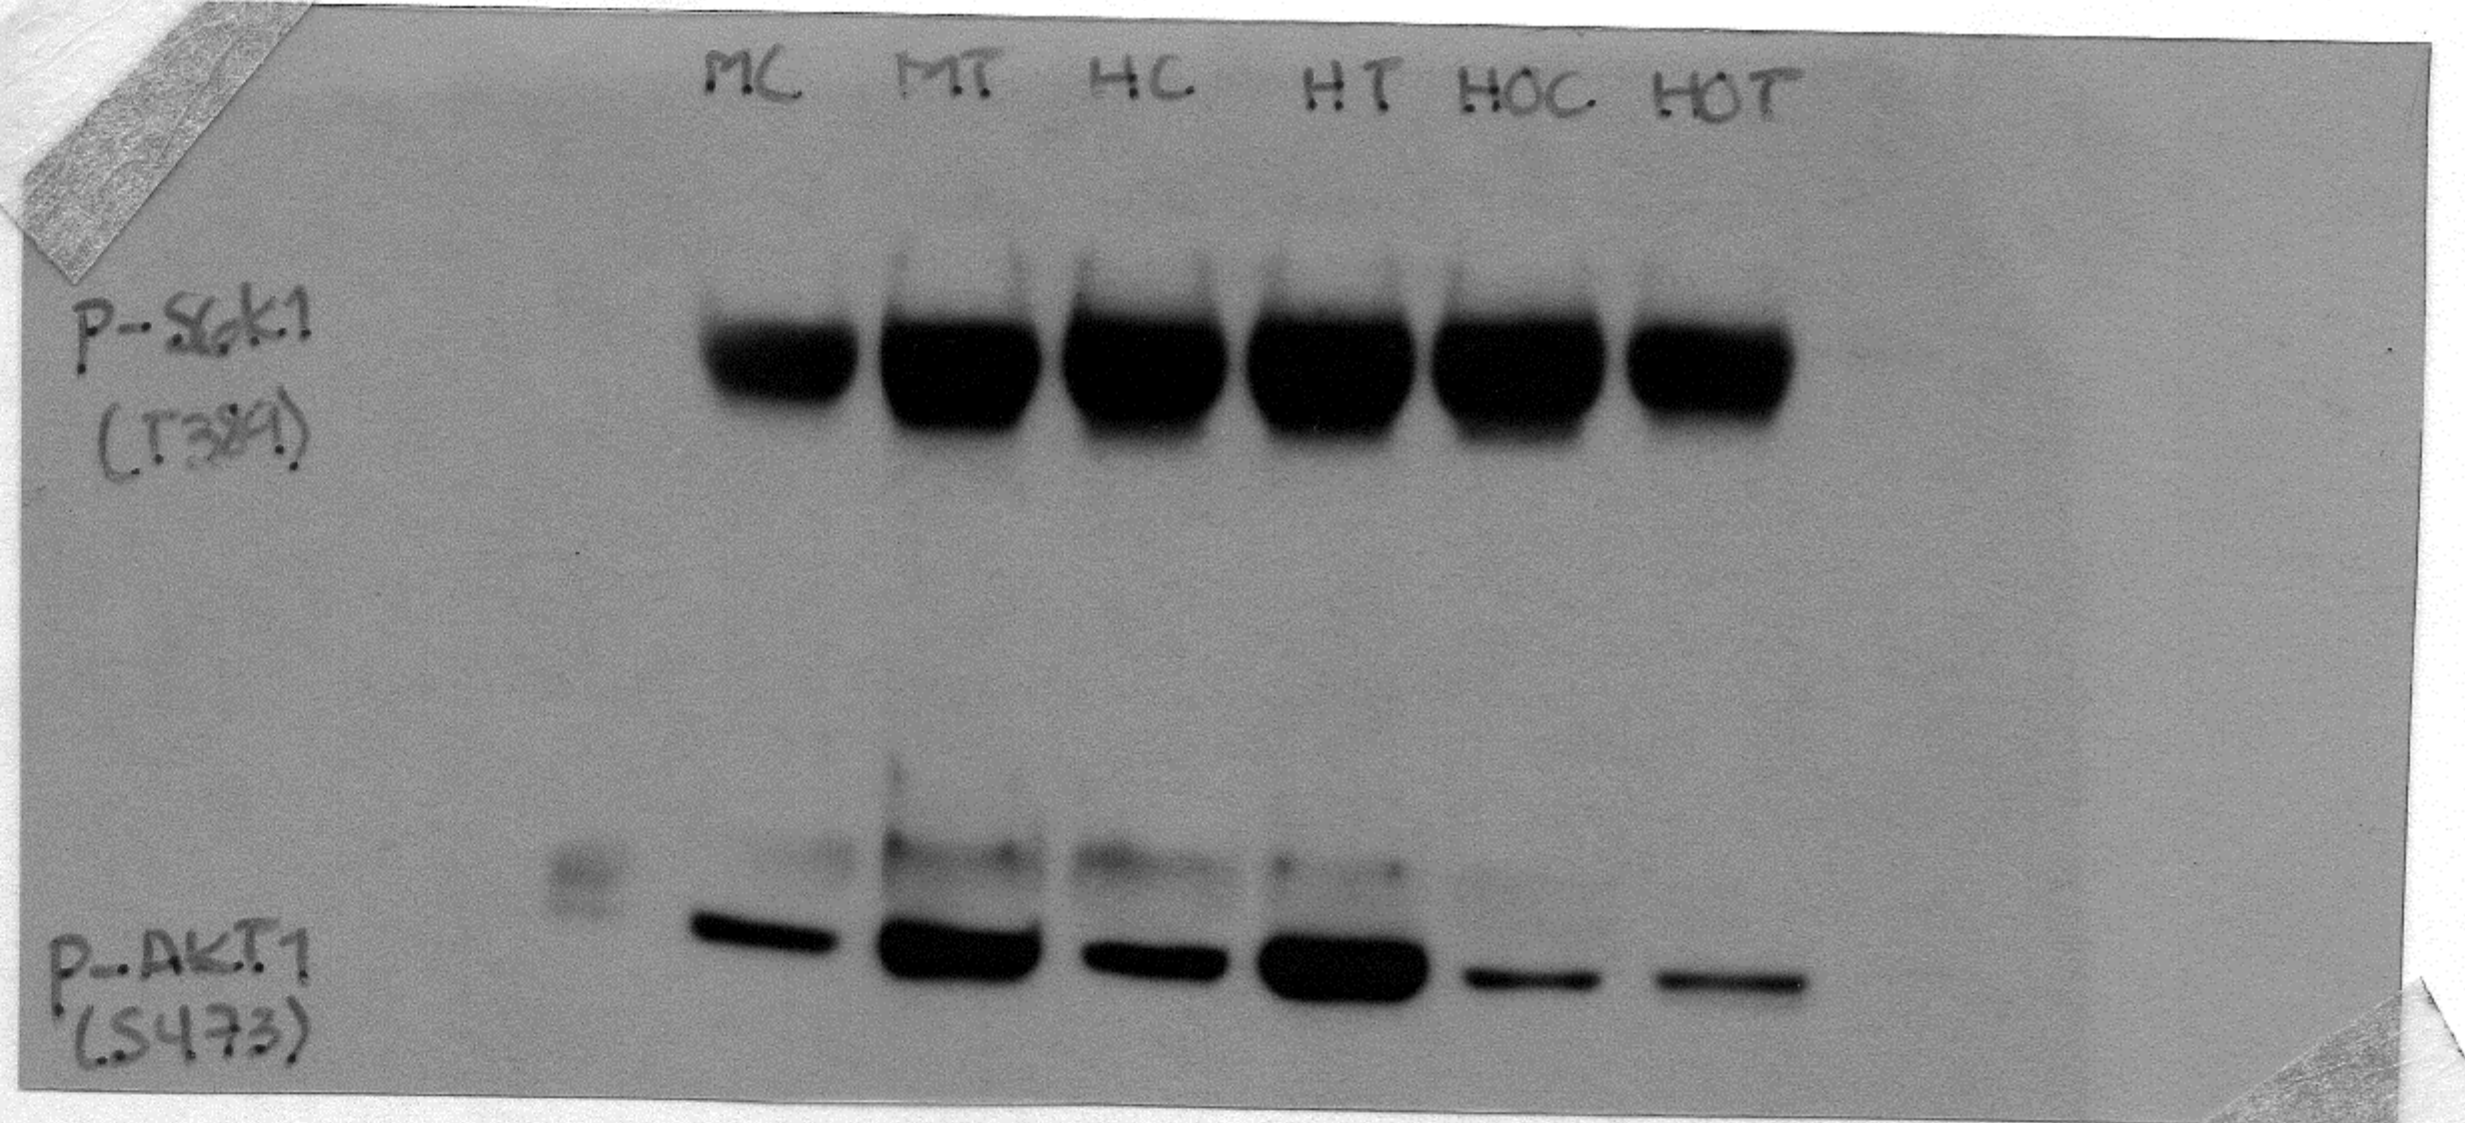

P-IRS1 (S1101)

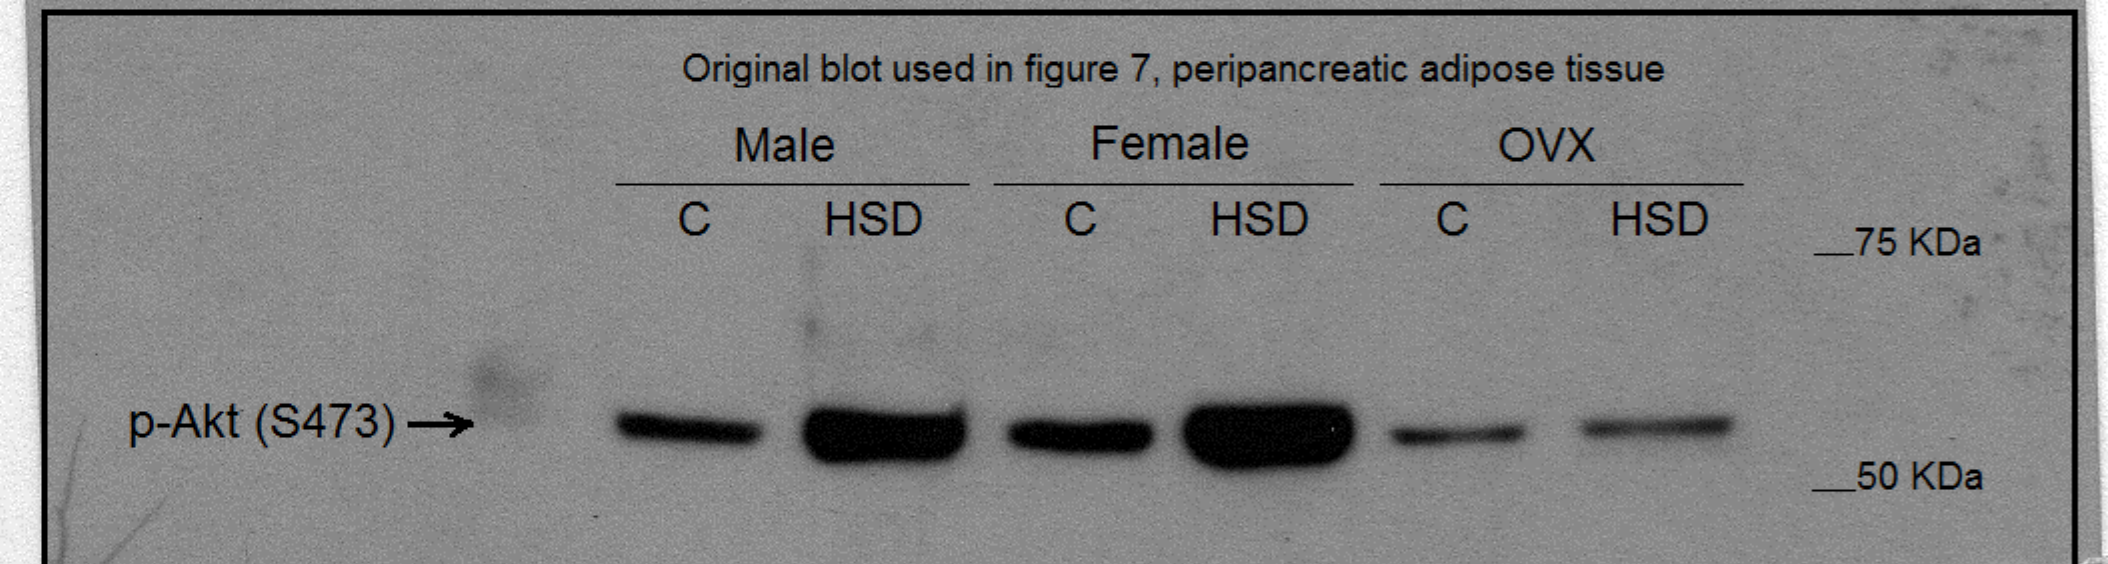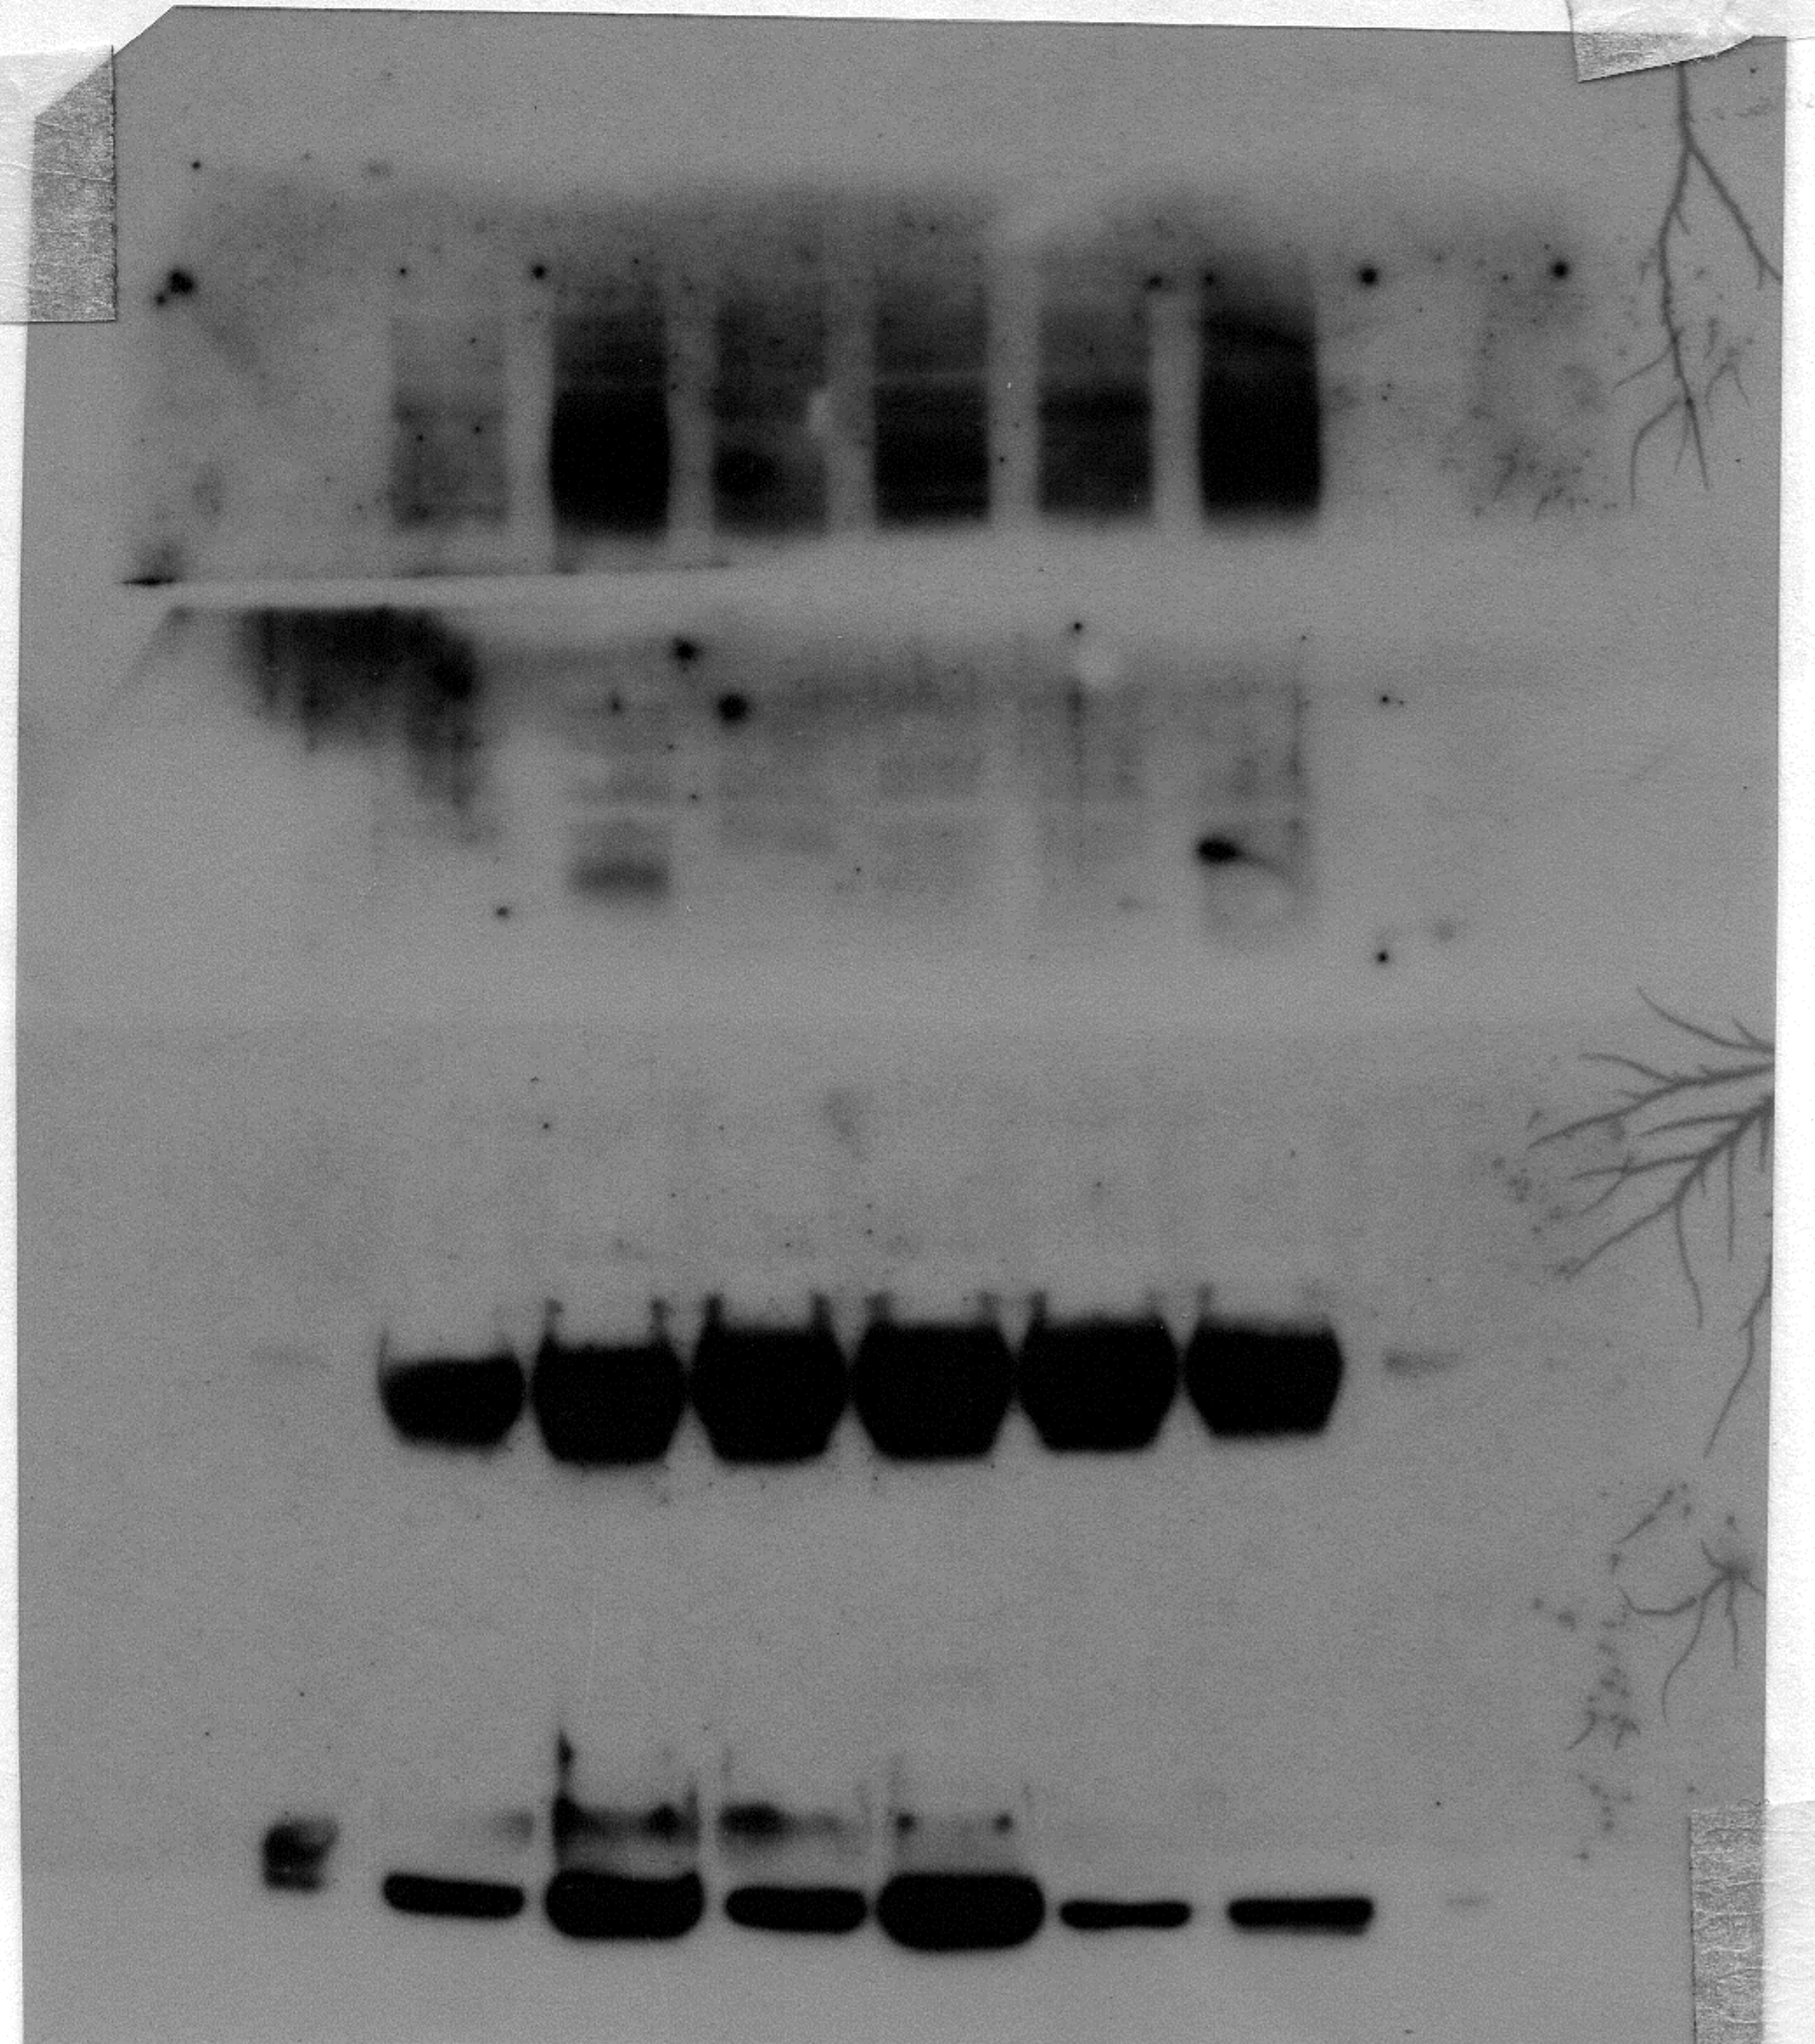

18 Ene 2018

Supplement: supplementary_figure_3.pdf [file supplementary_figure_3.pdf]

TAP

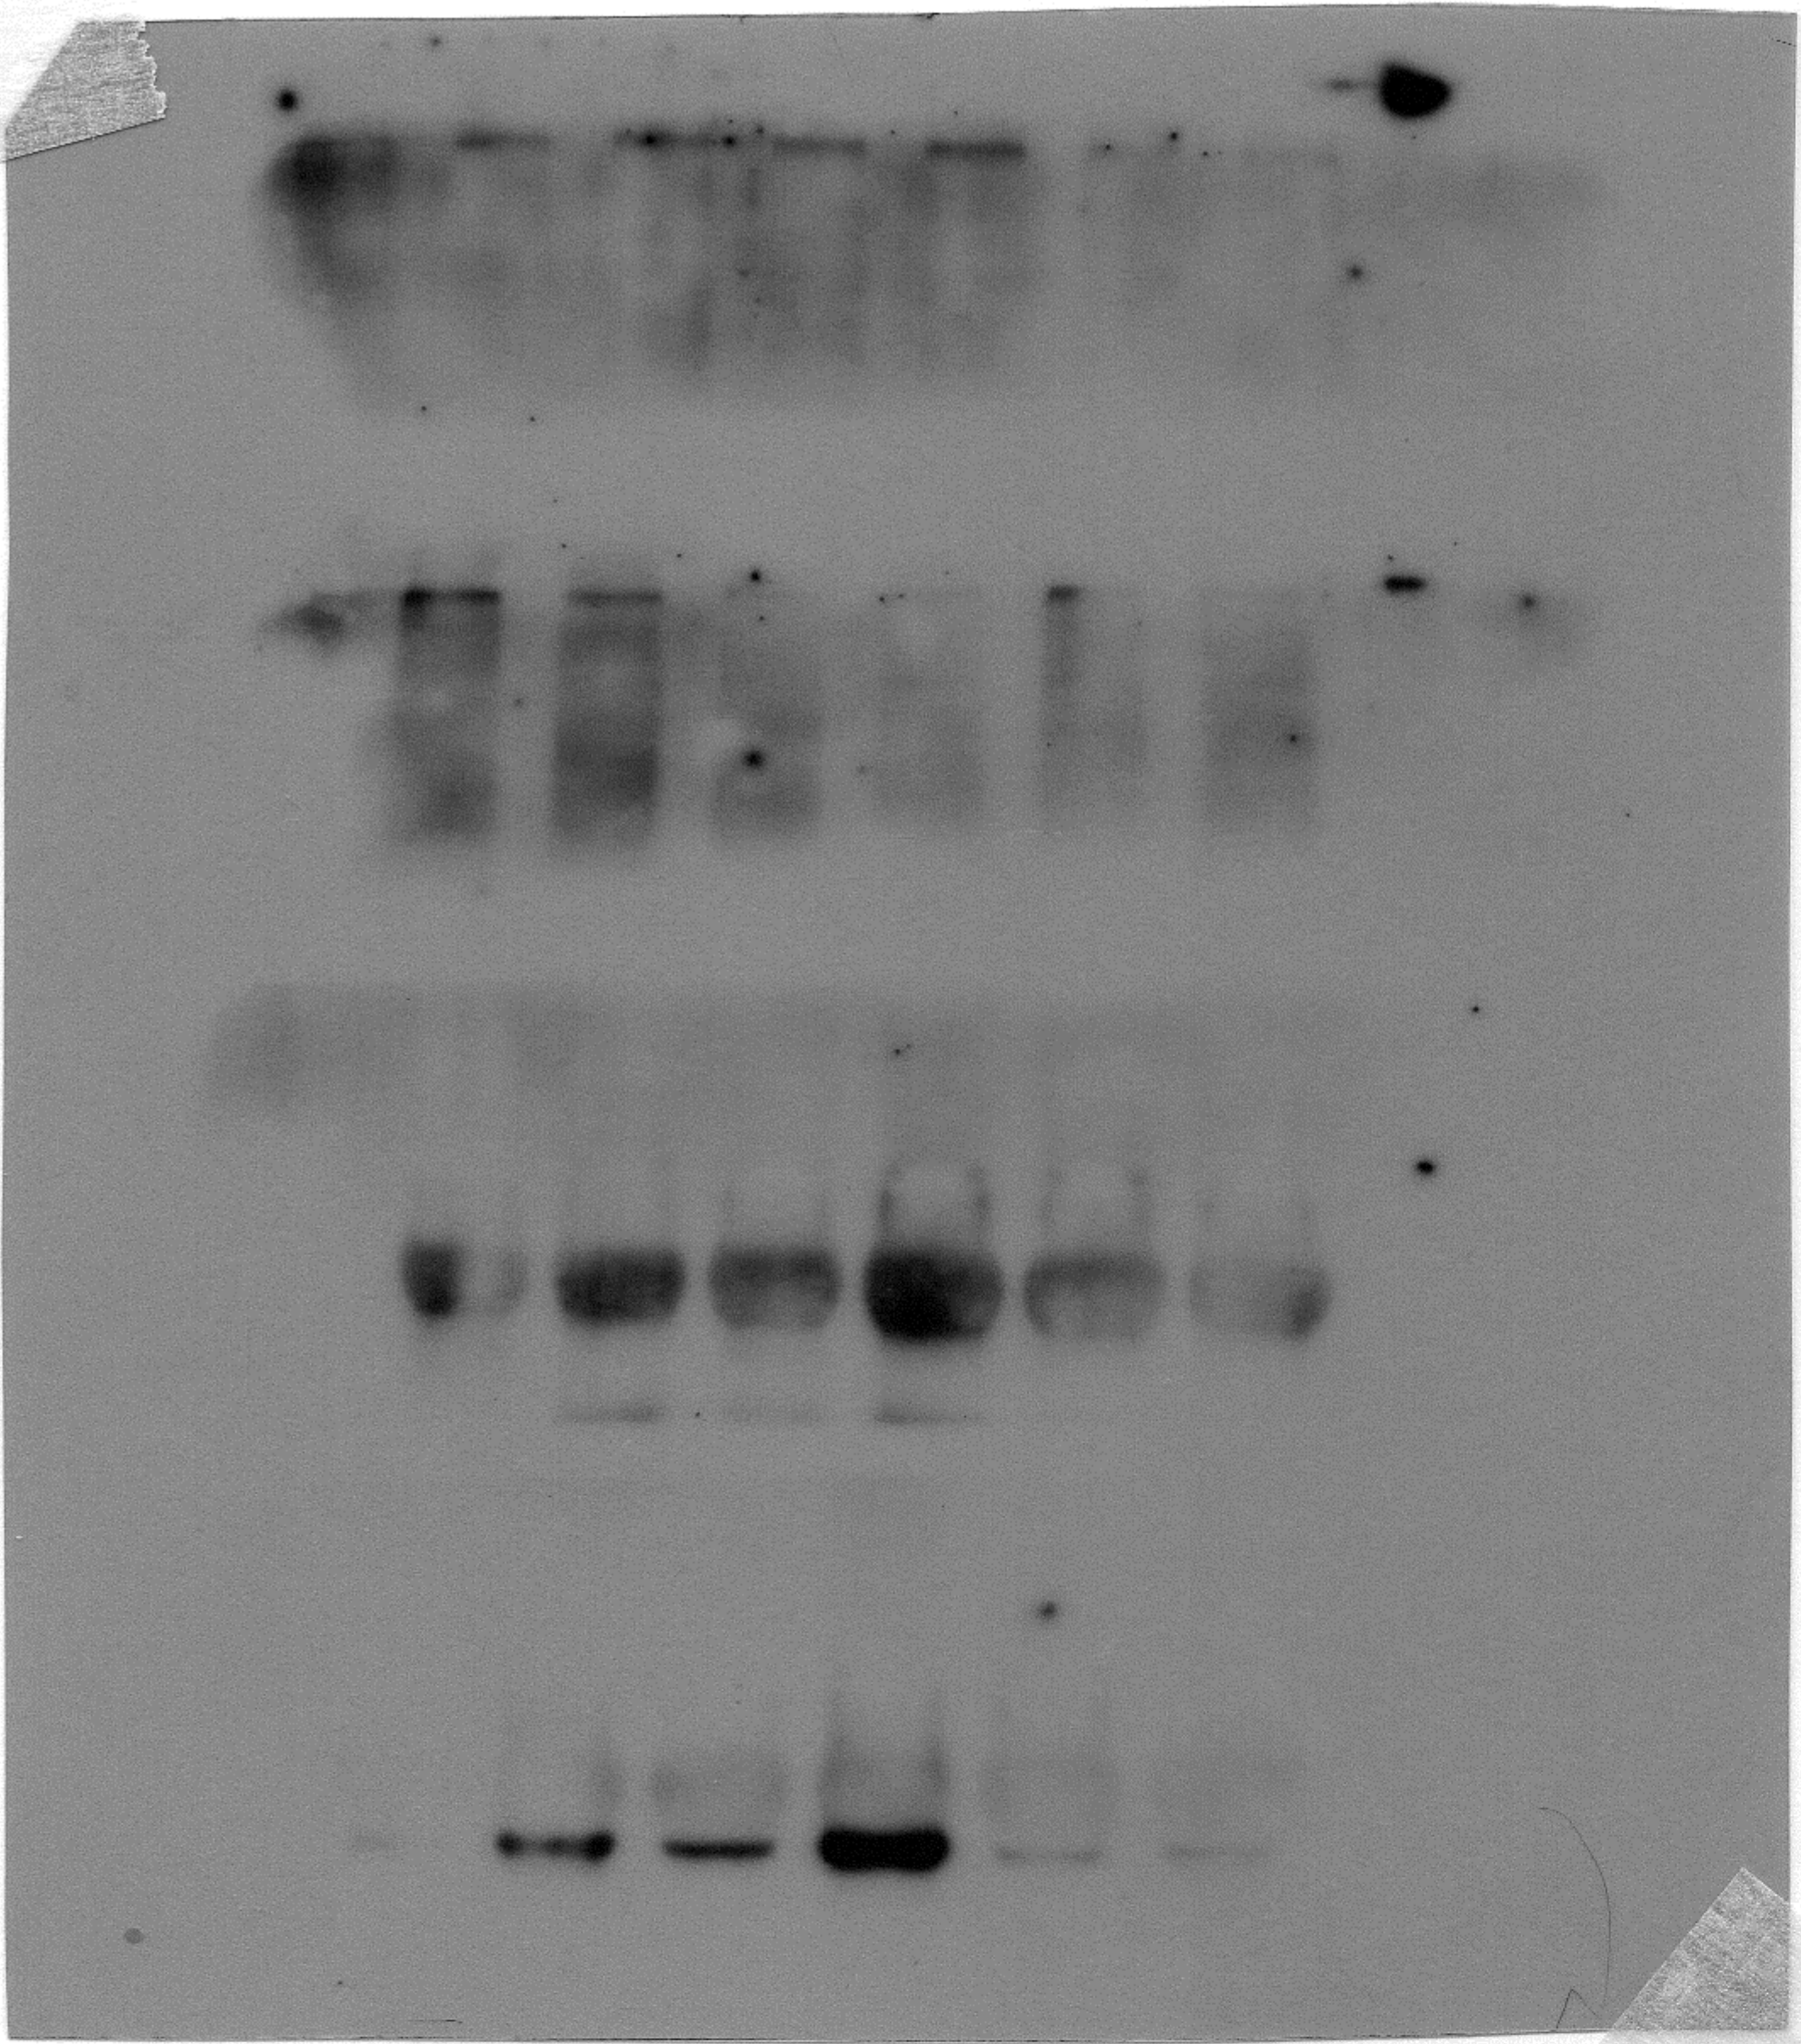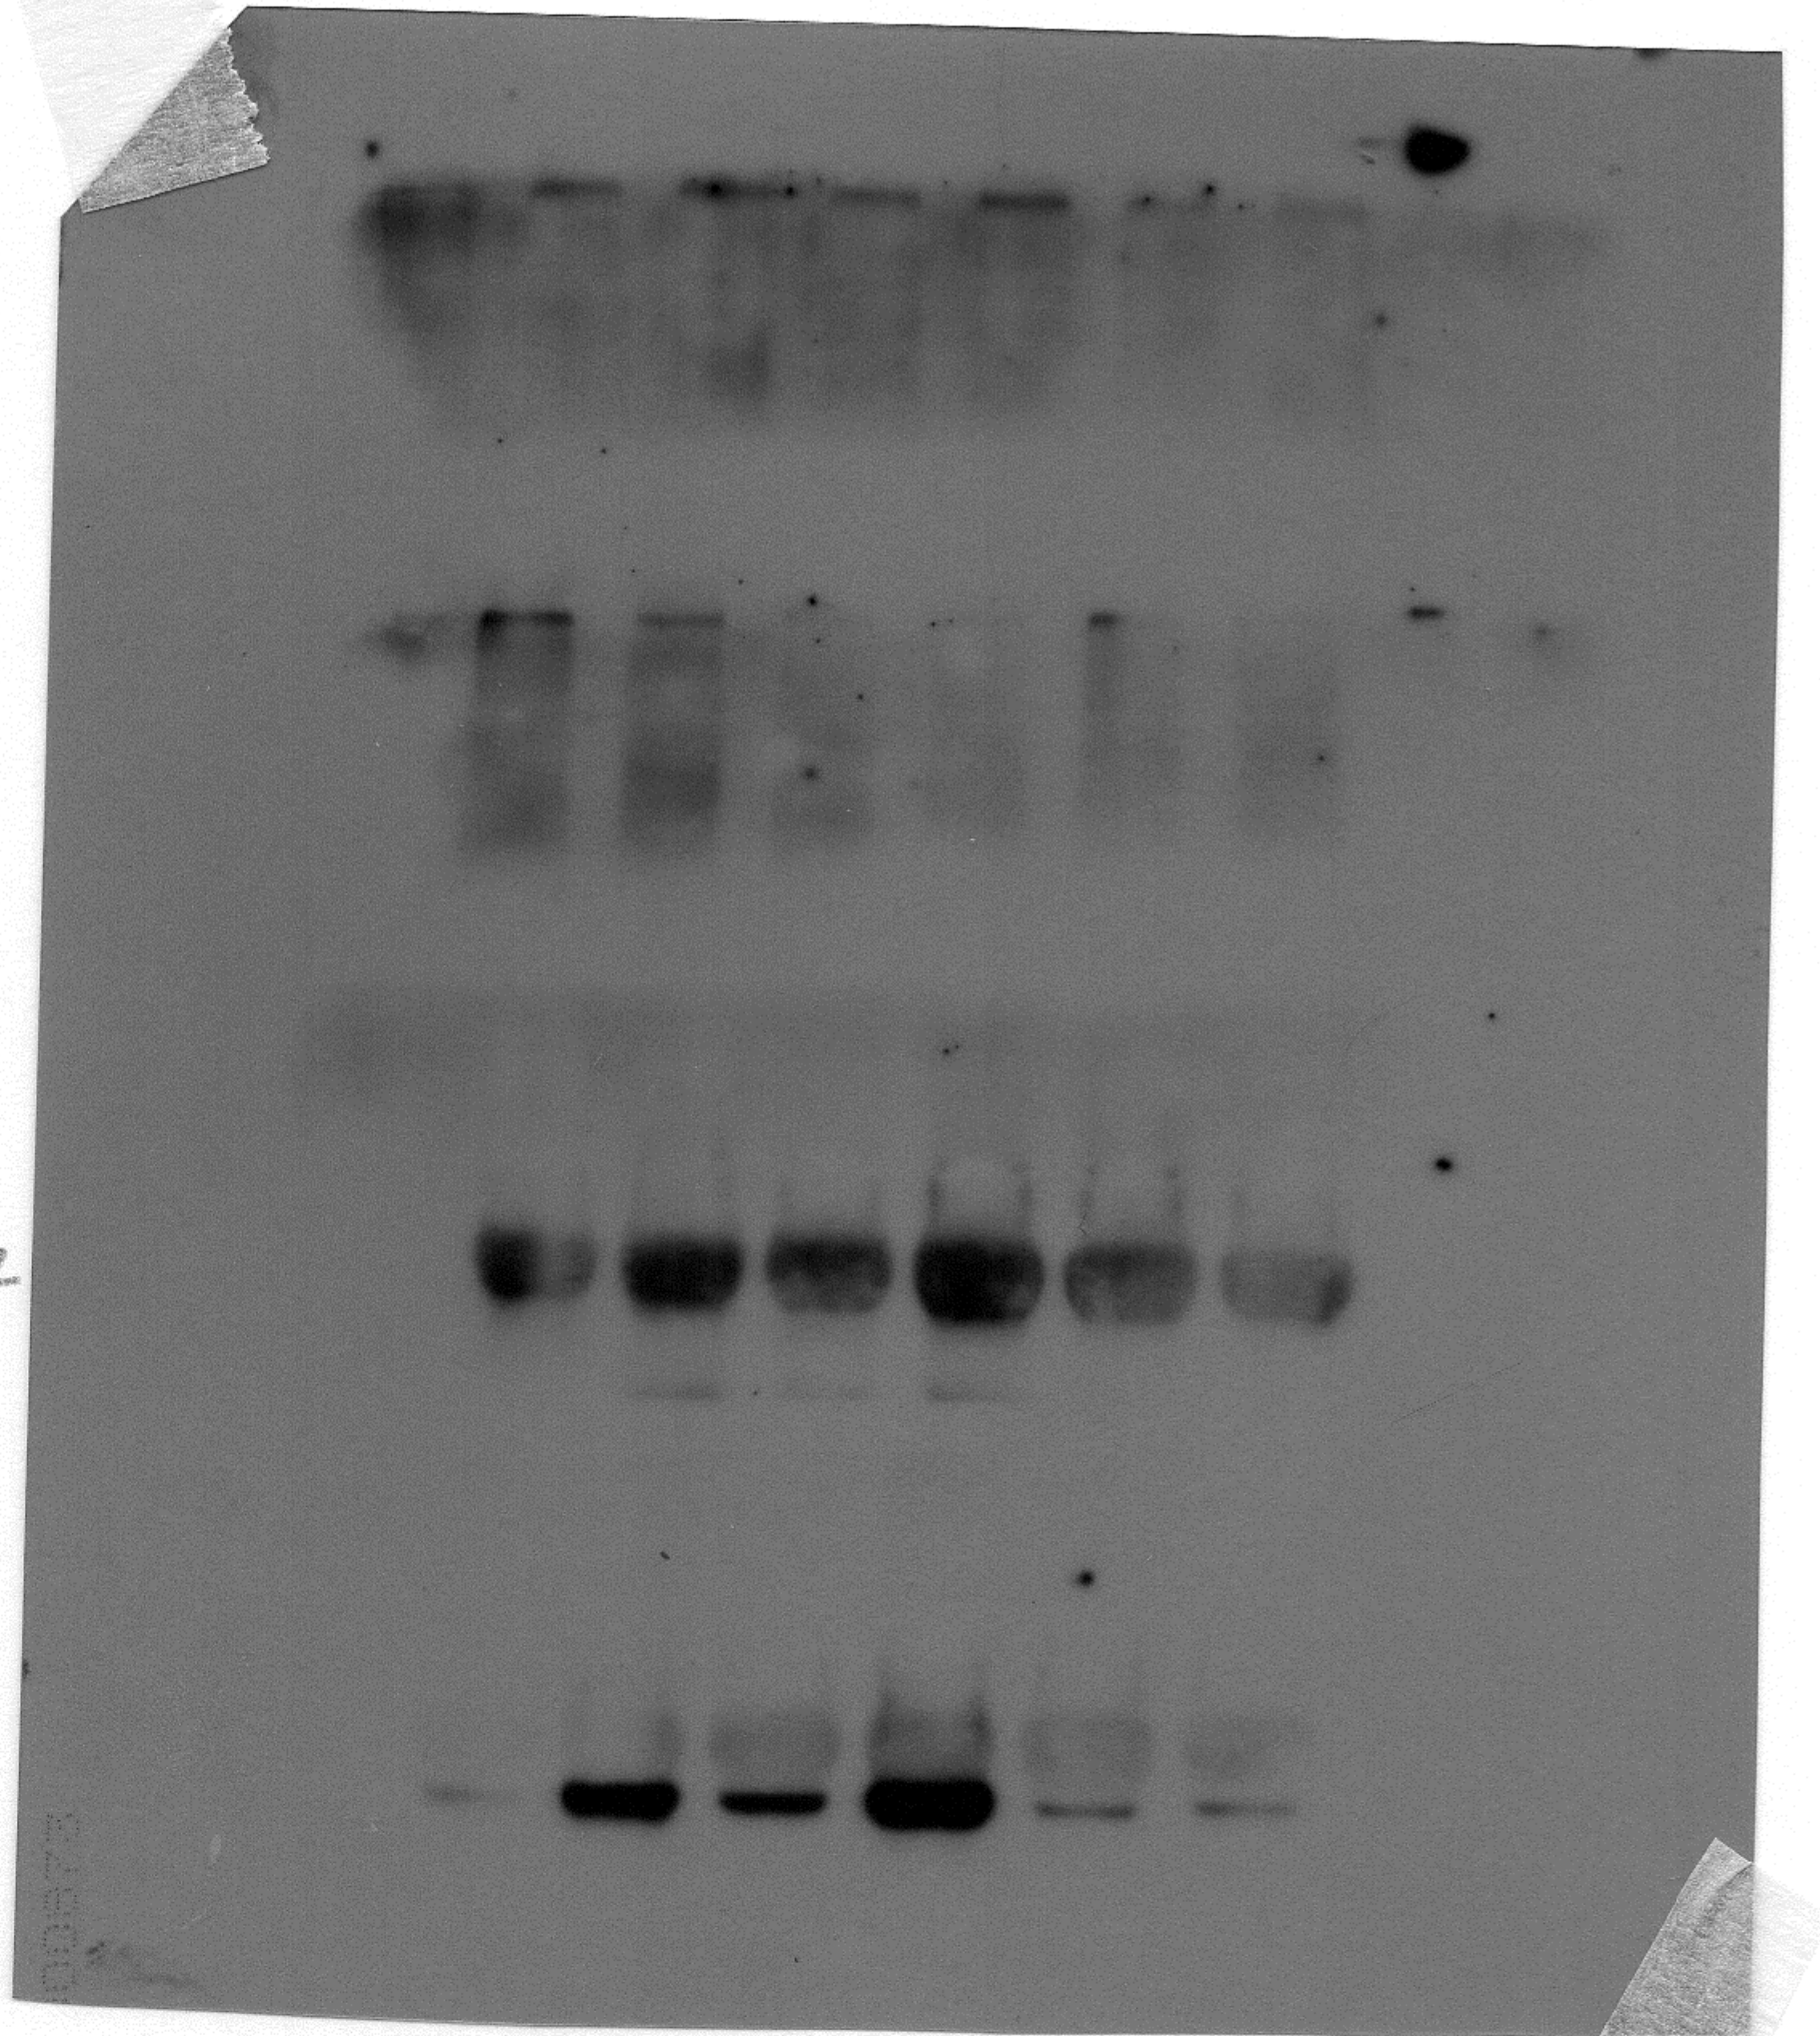

p-S6K  
→

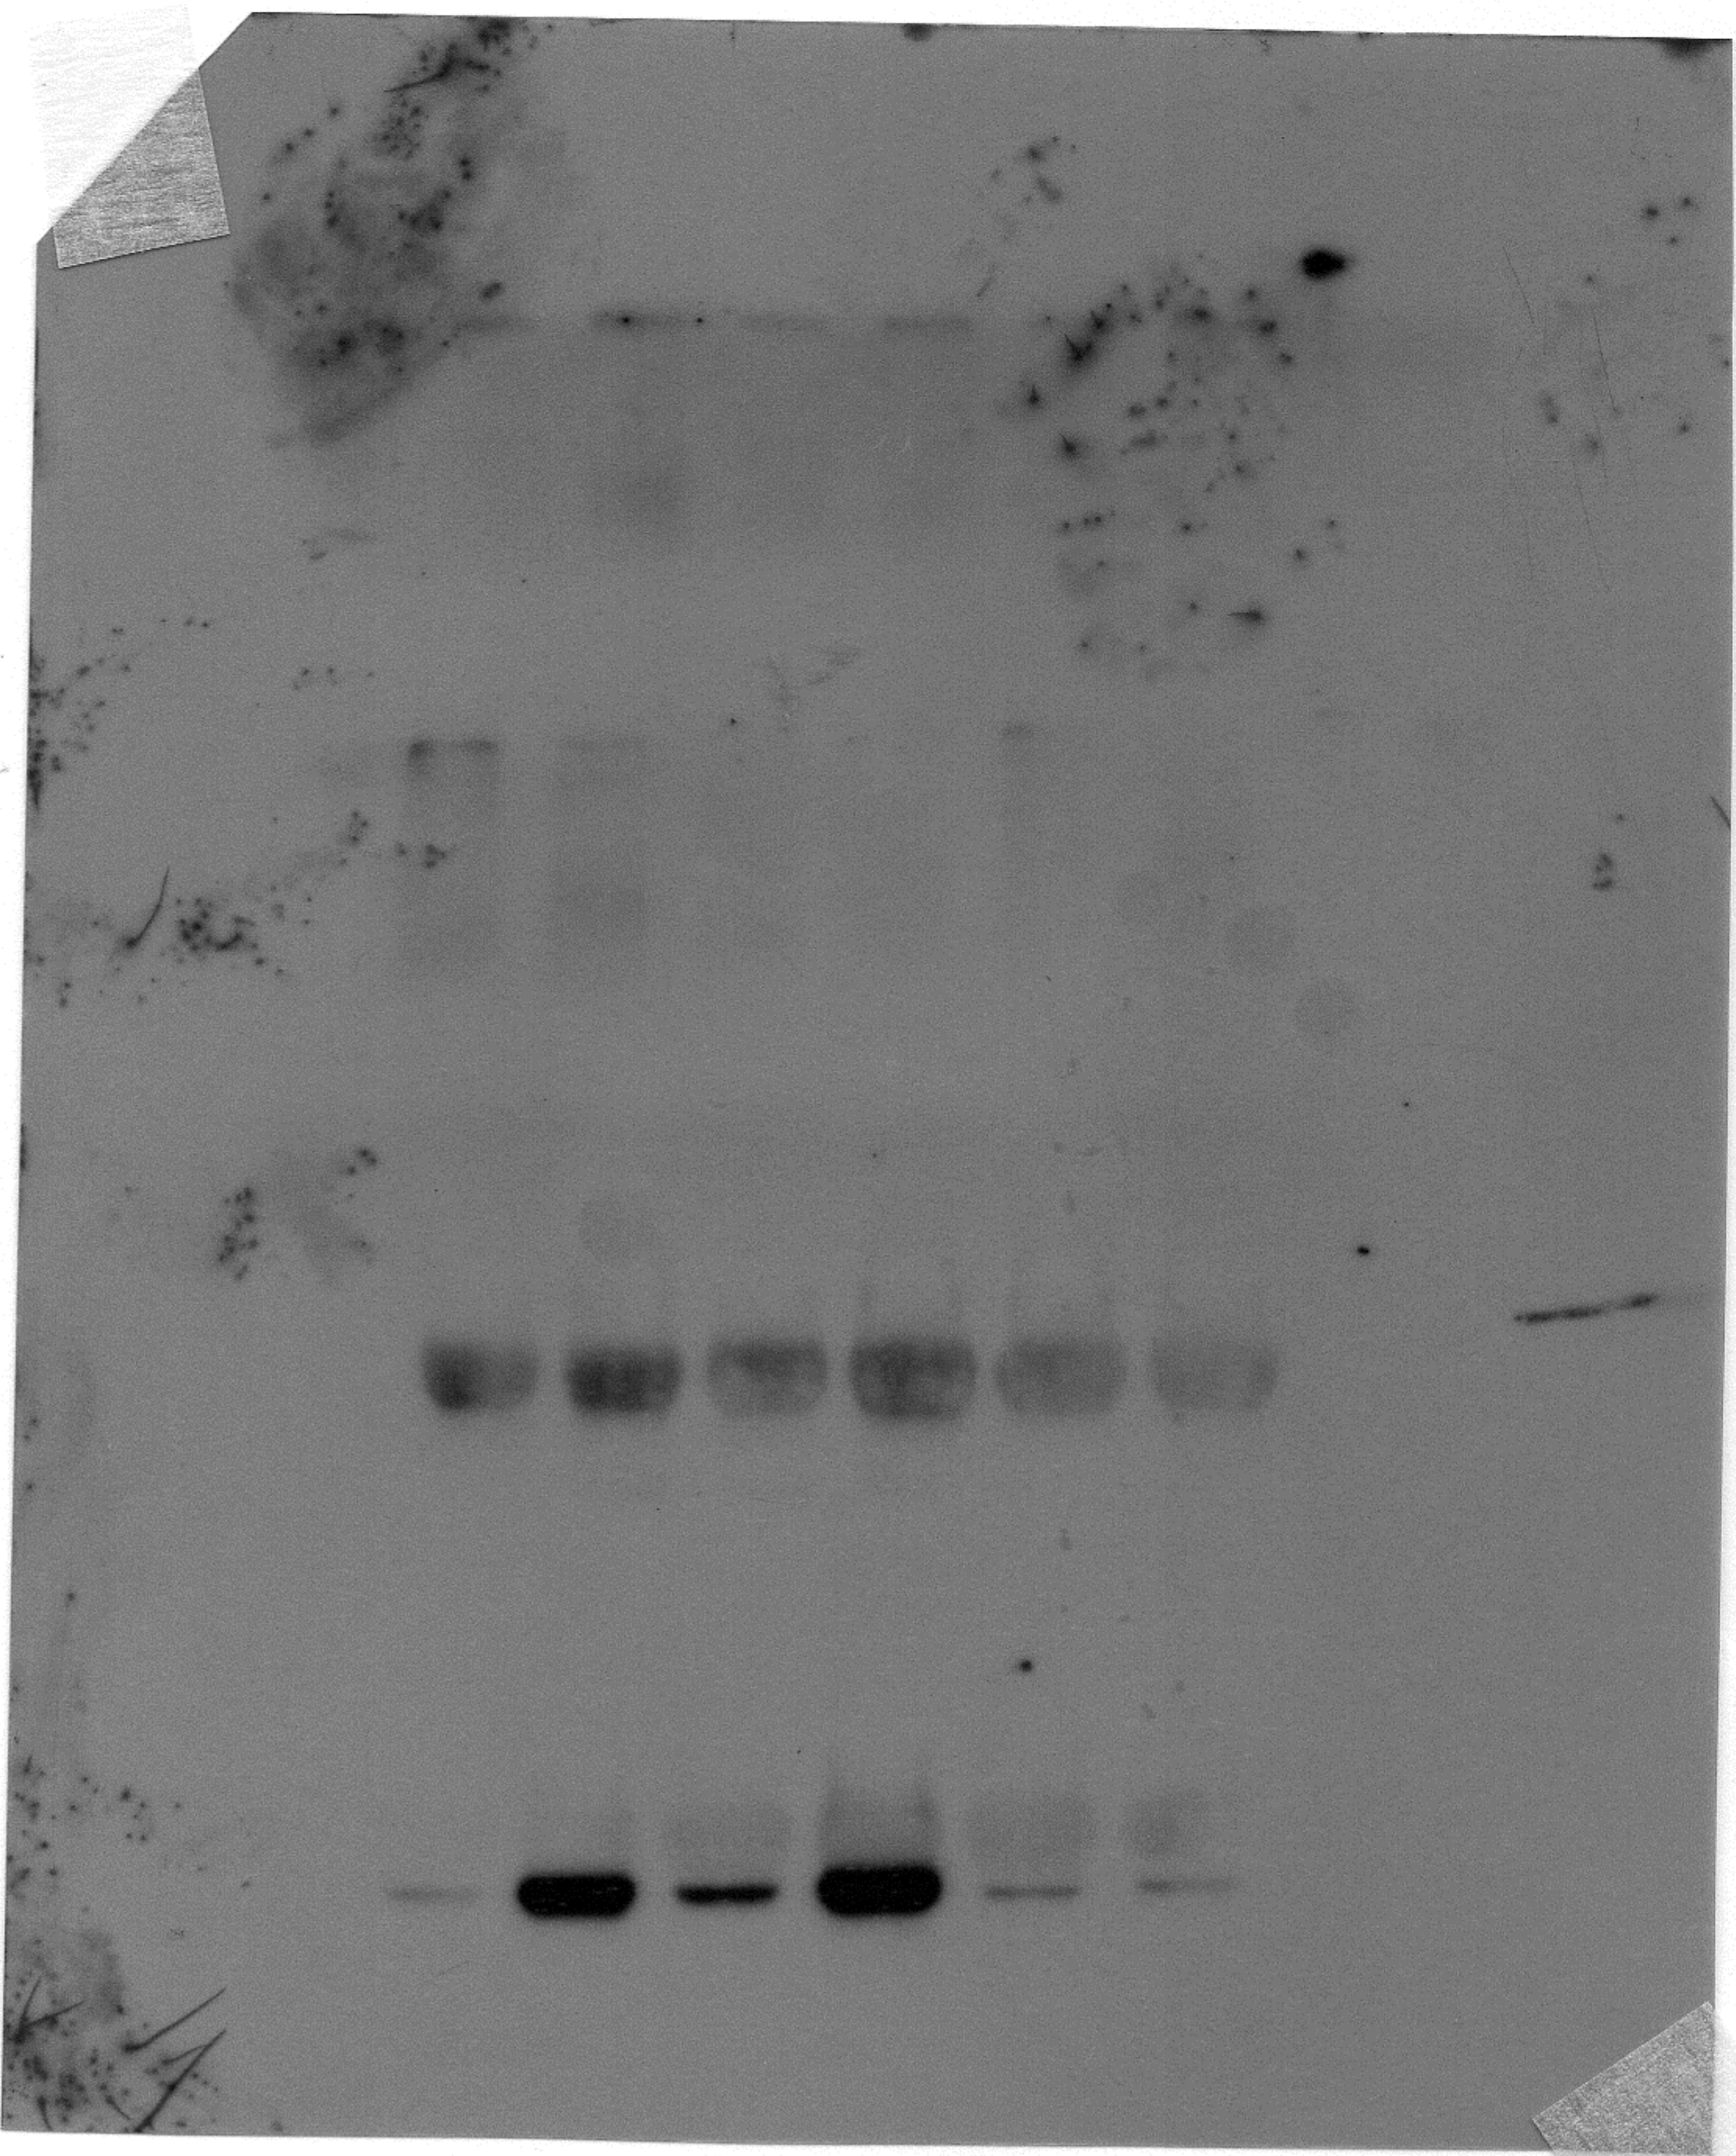

PAK

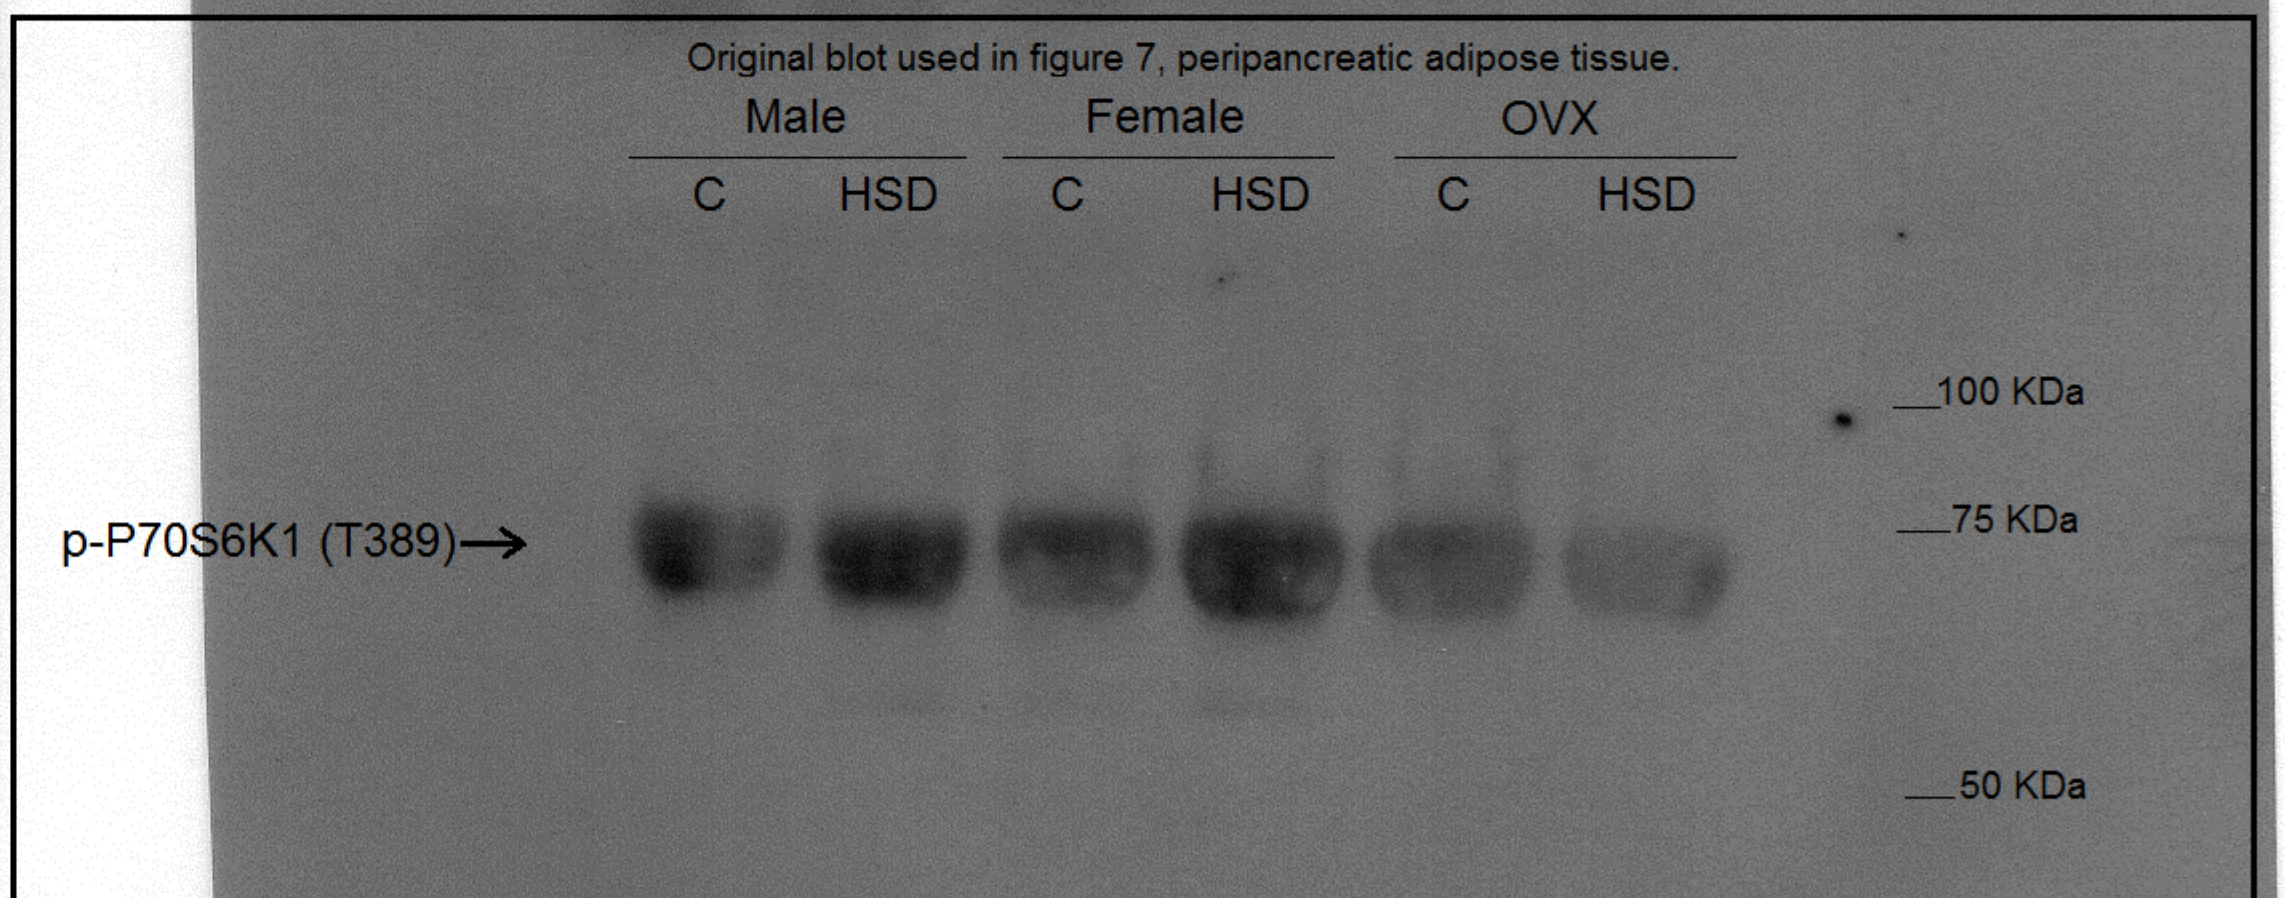

07 MAR 2018

Supplement: supplementary_figure_5.pdf [file supplementary_figure_5.pdf]

TAP

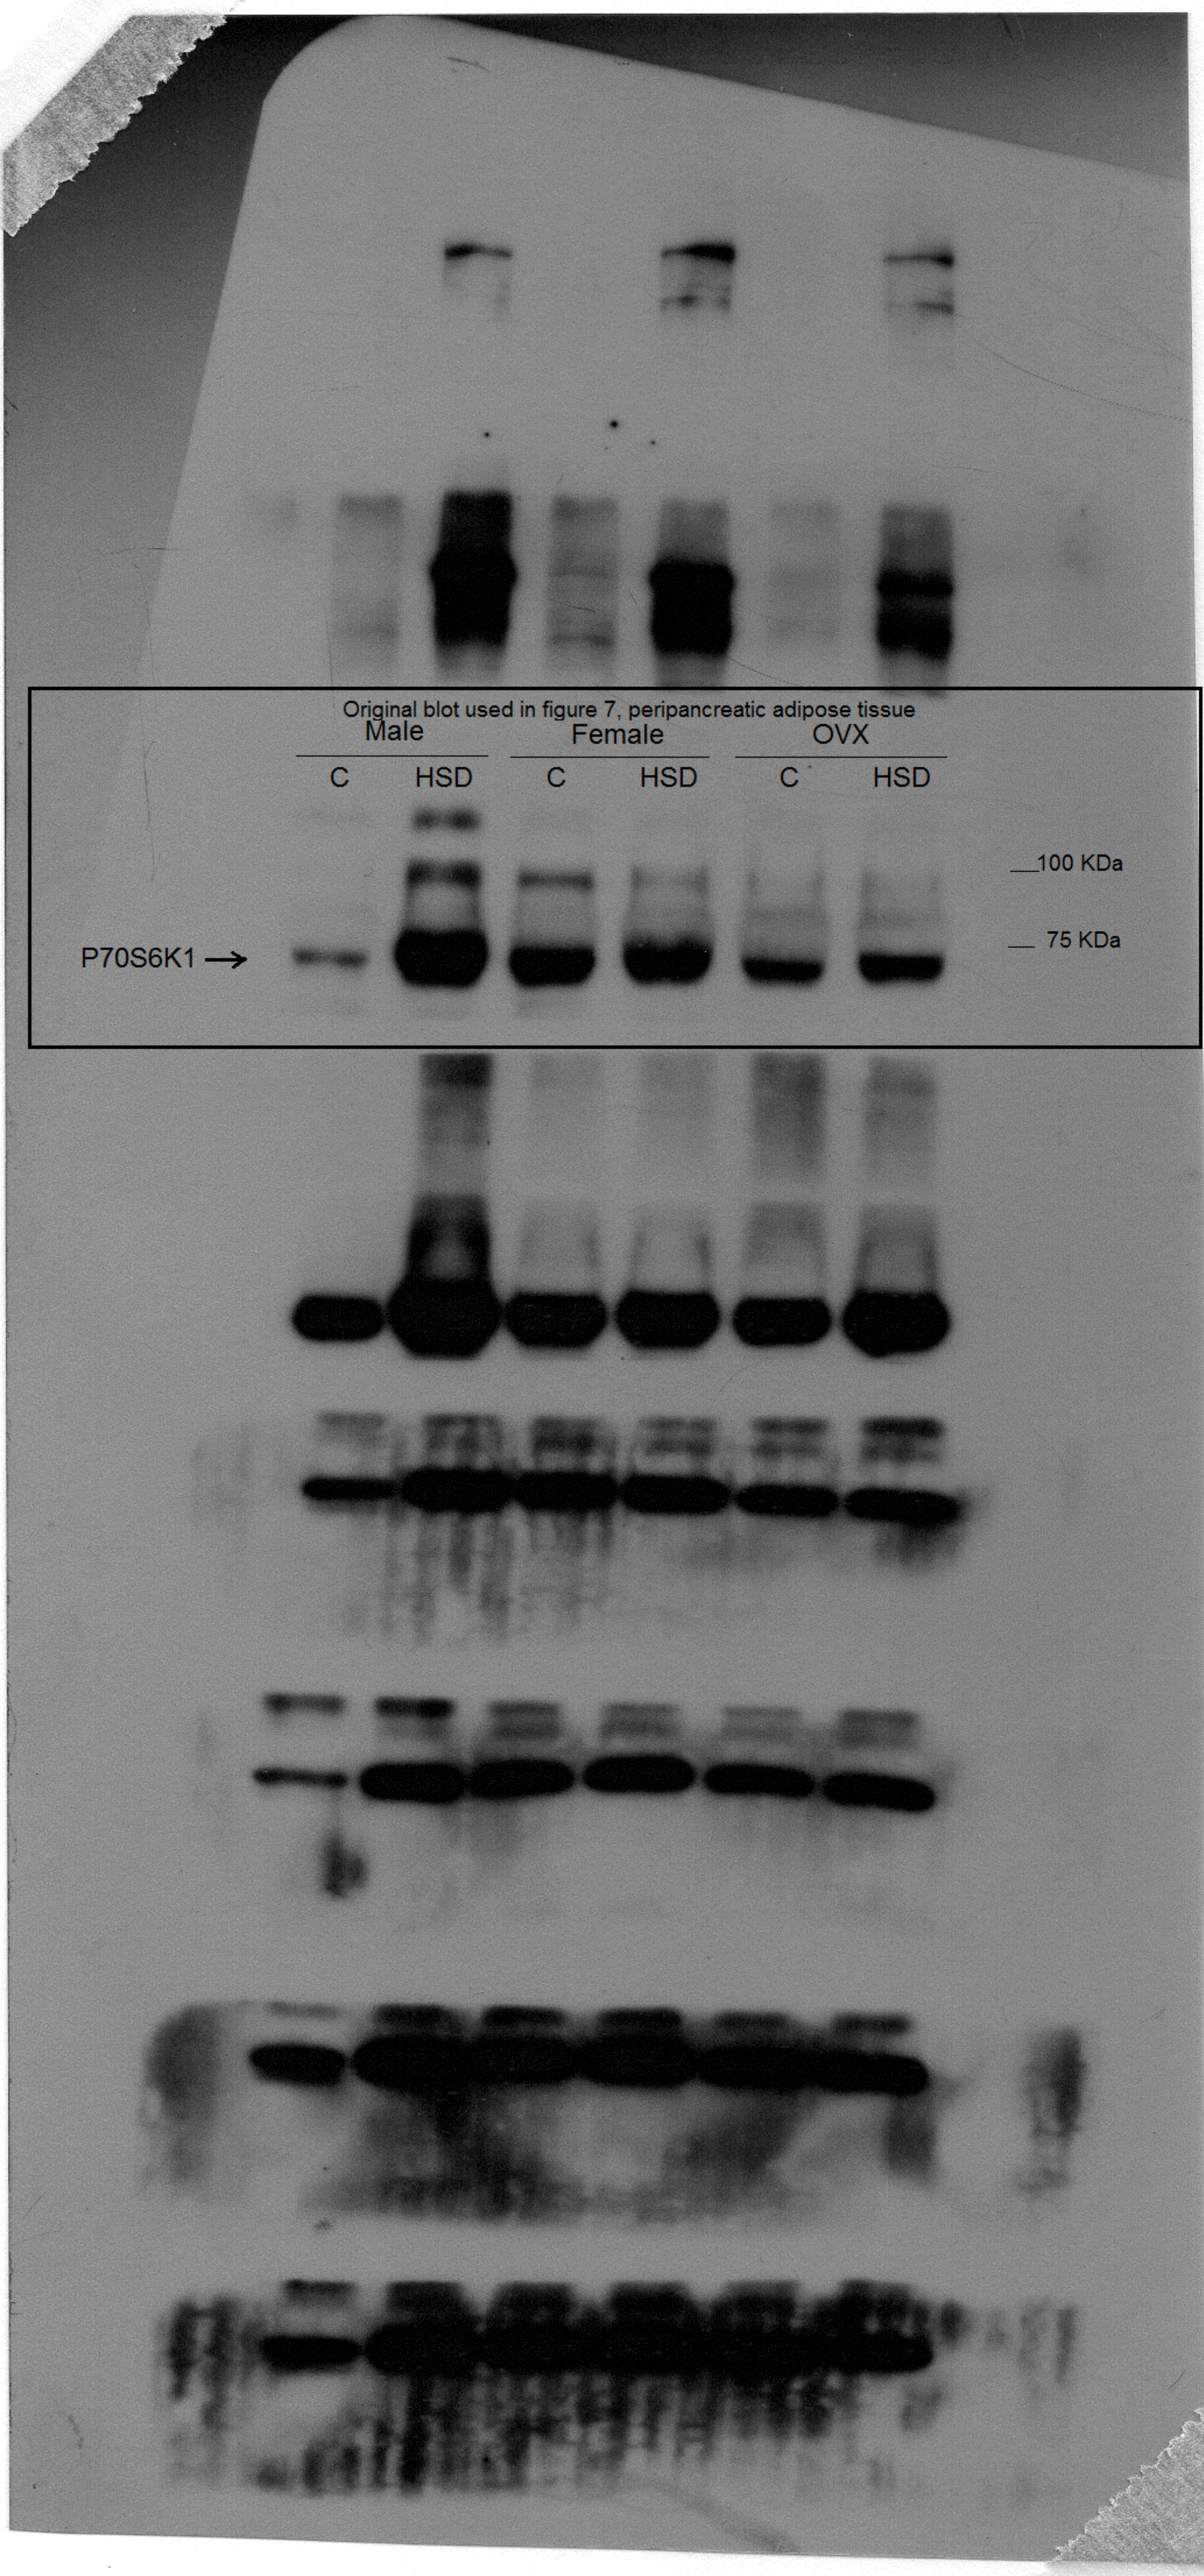

IRS1 →

AKT →

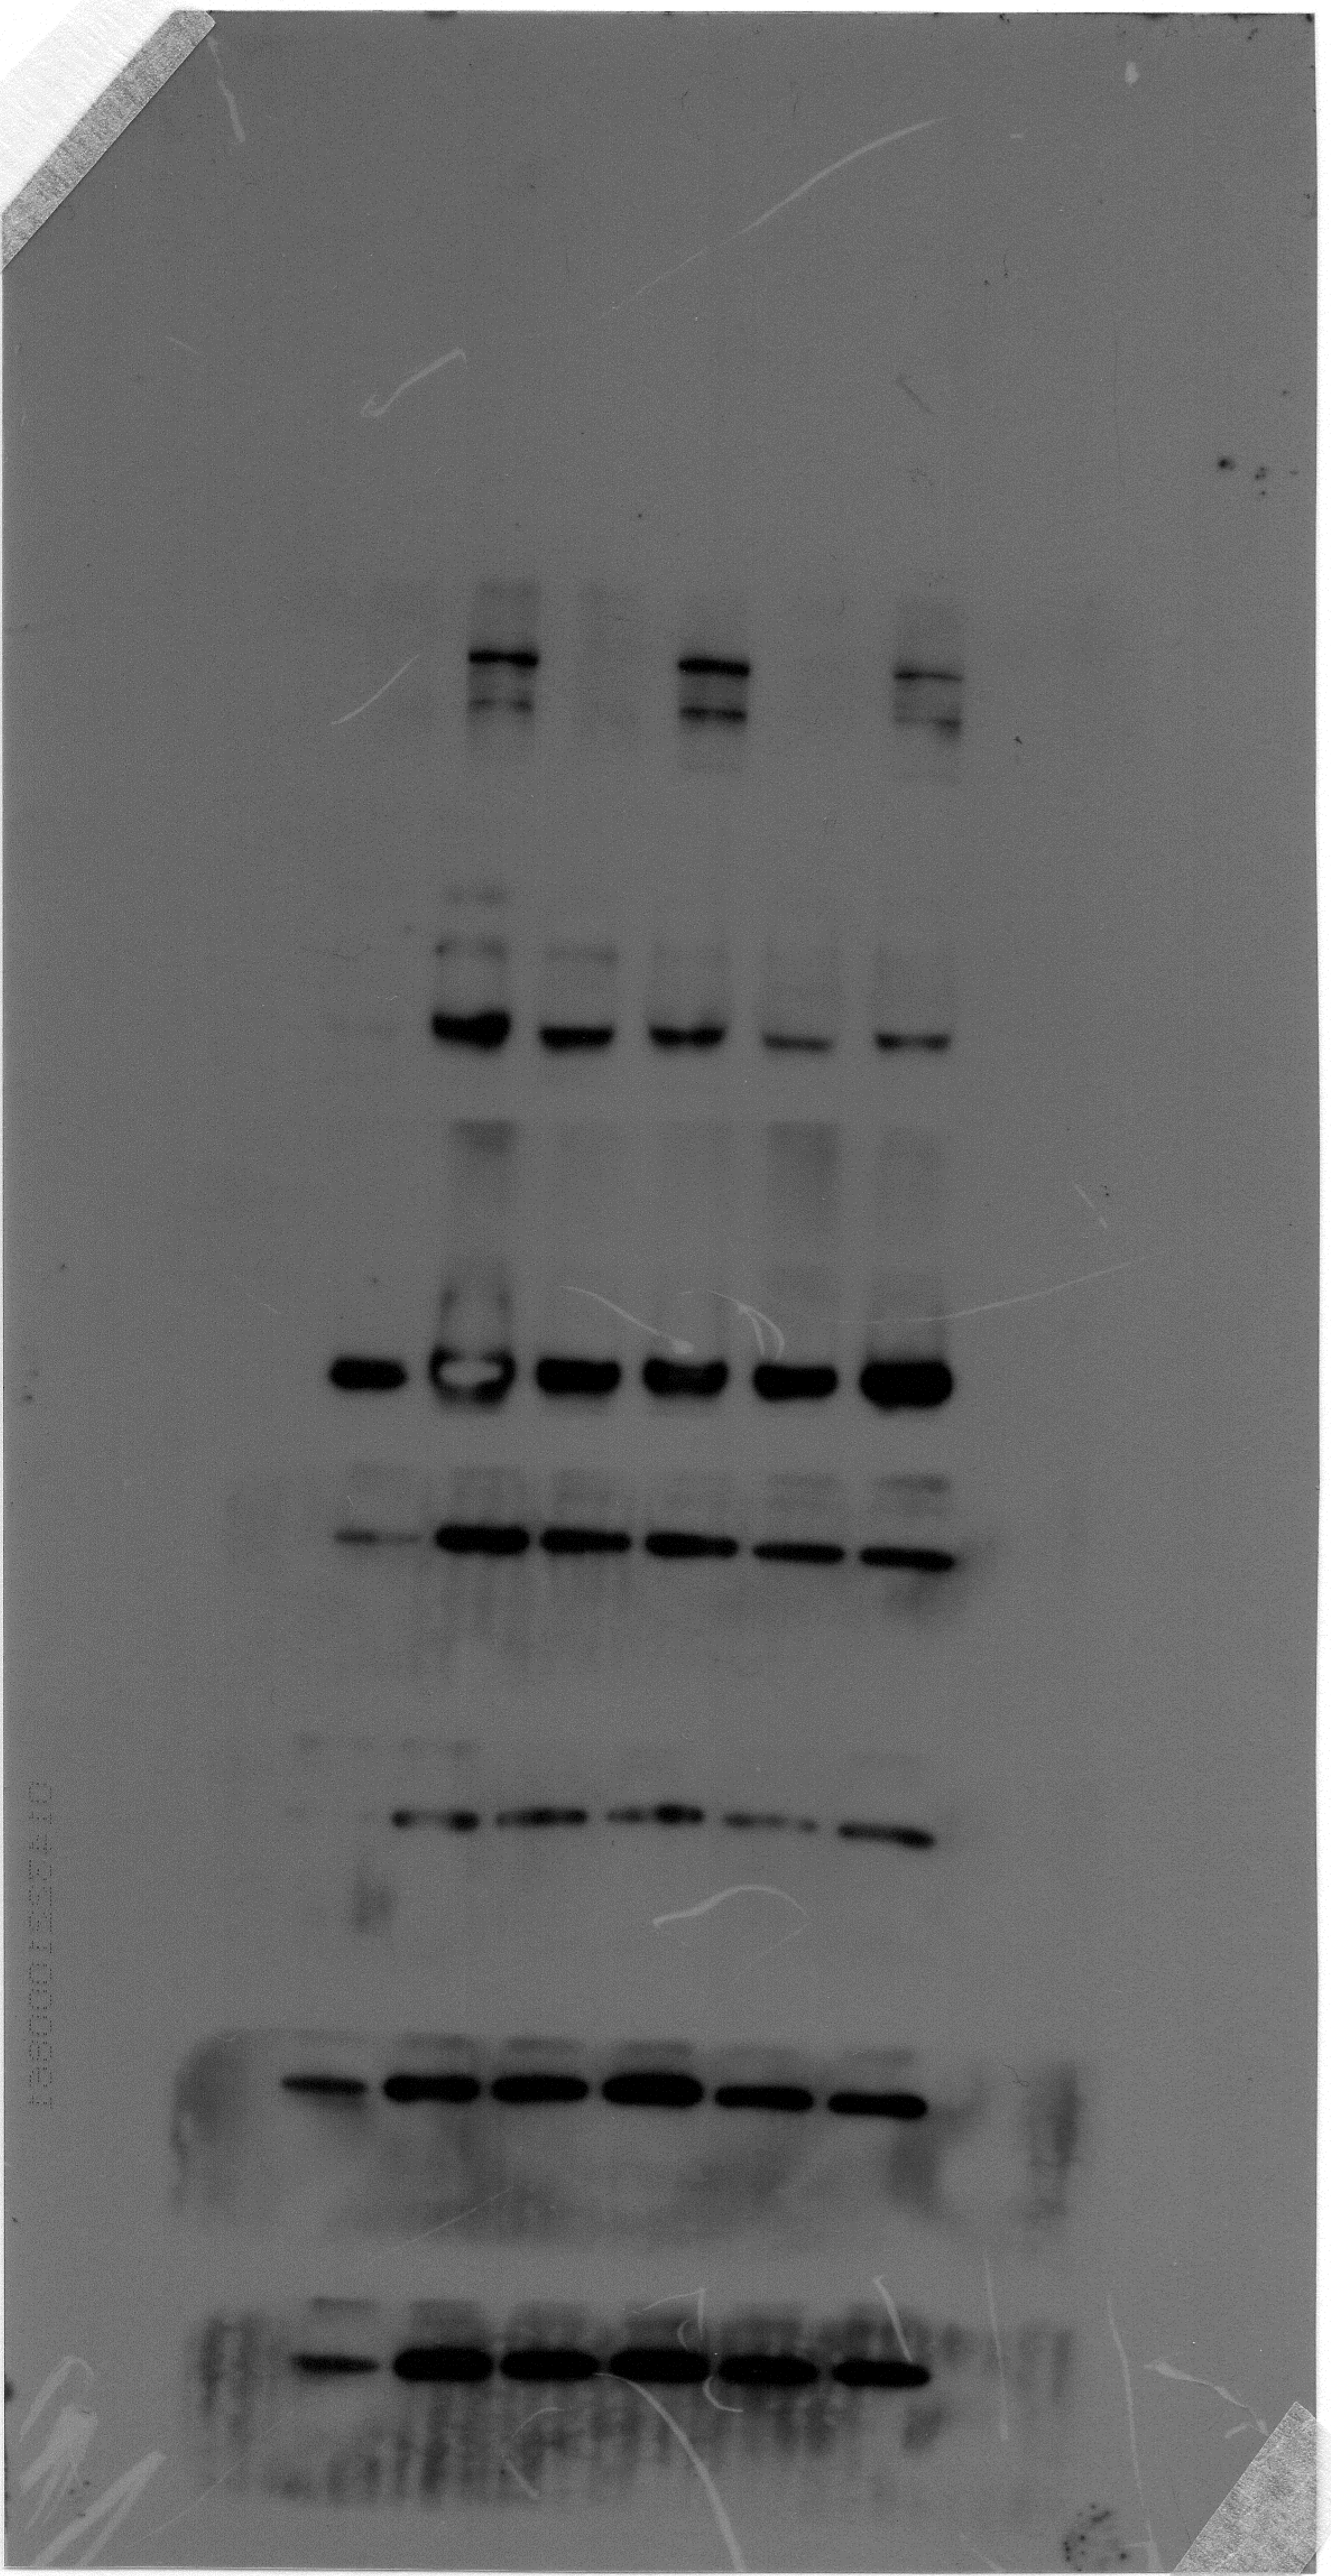

07 MAR 2018

Supplement: supplementary_figure_6.pdf [file supplementary_figure_6.pdf]

TAG

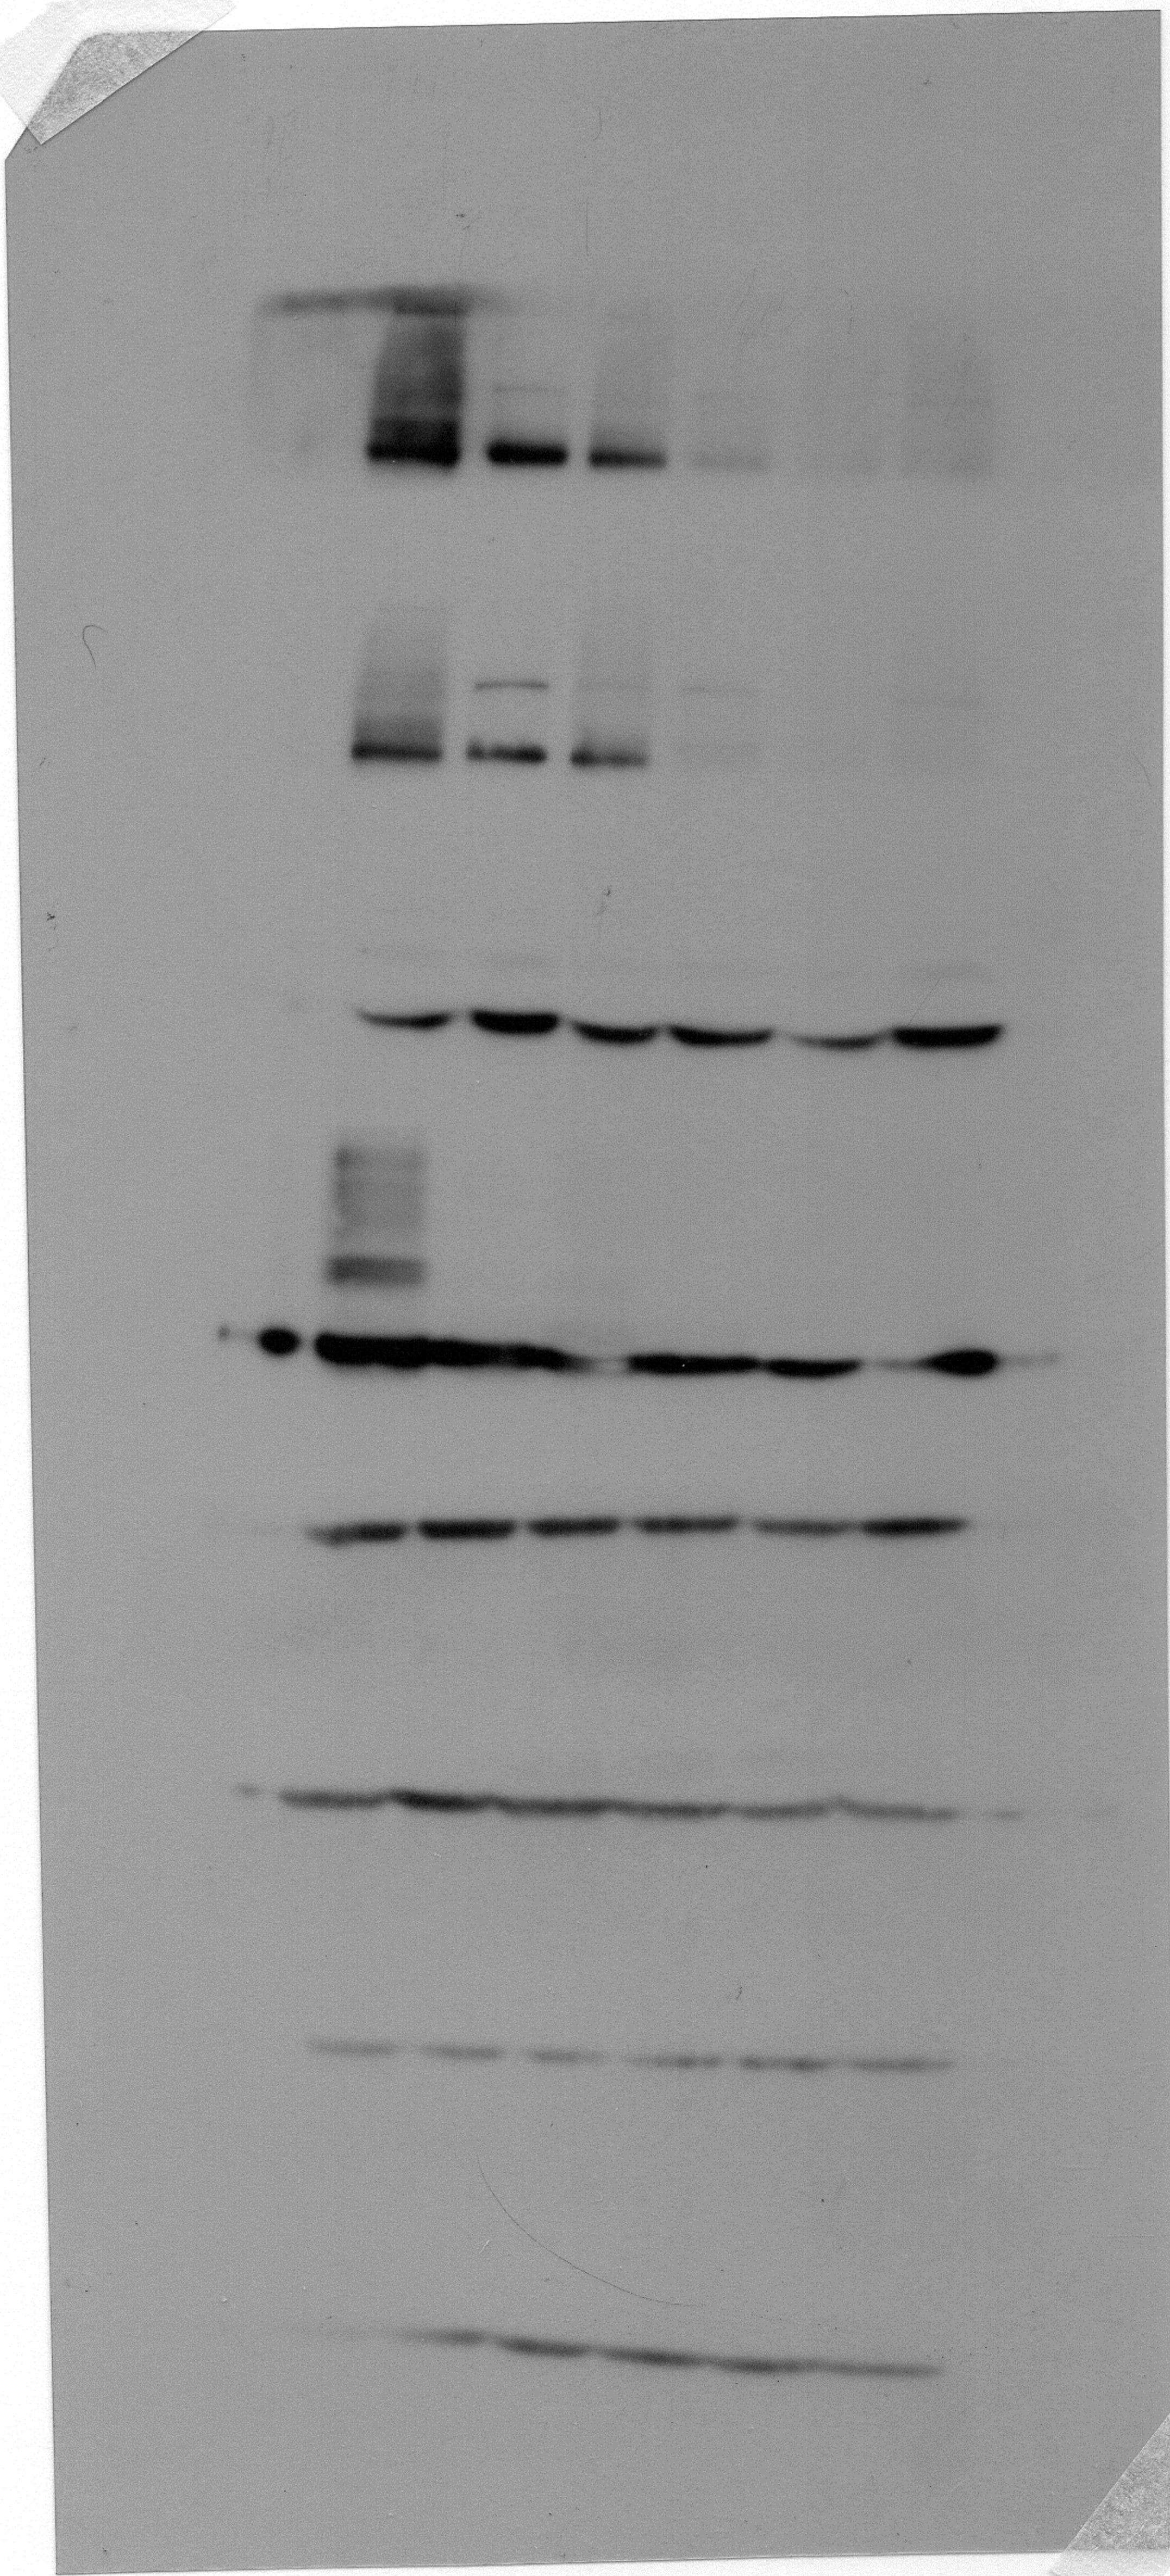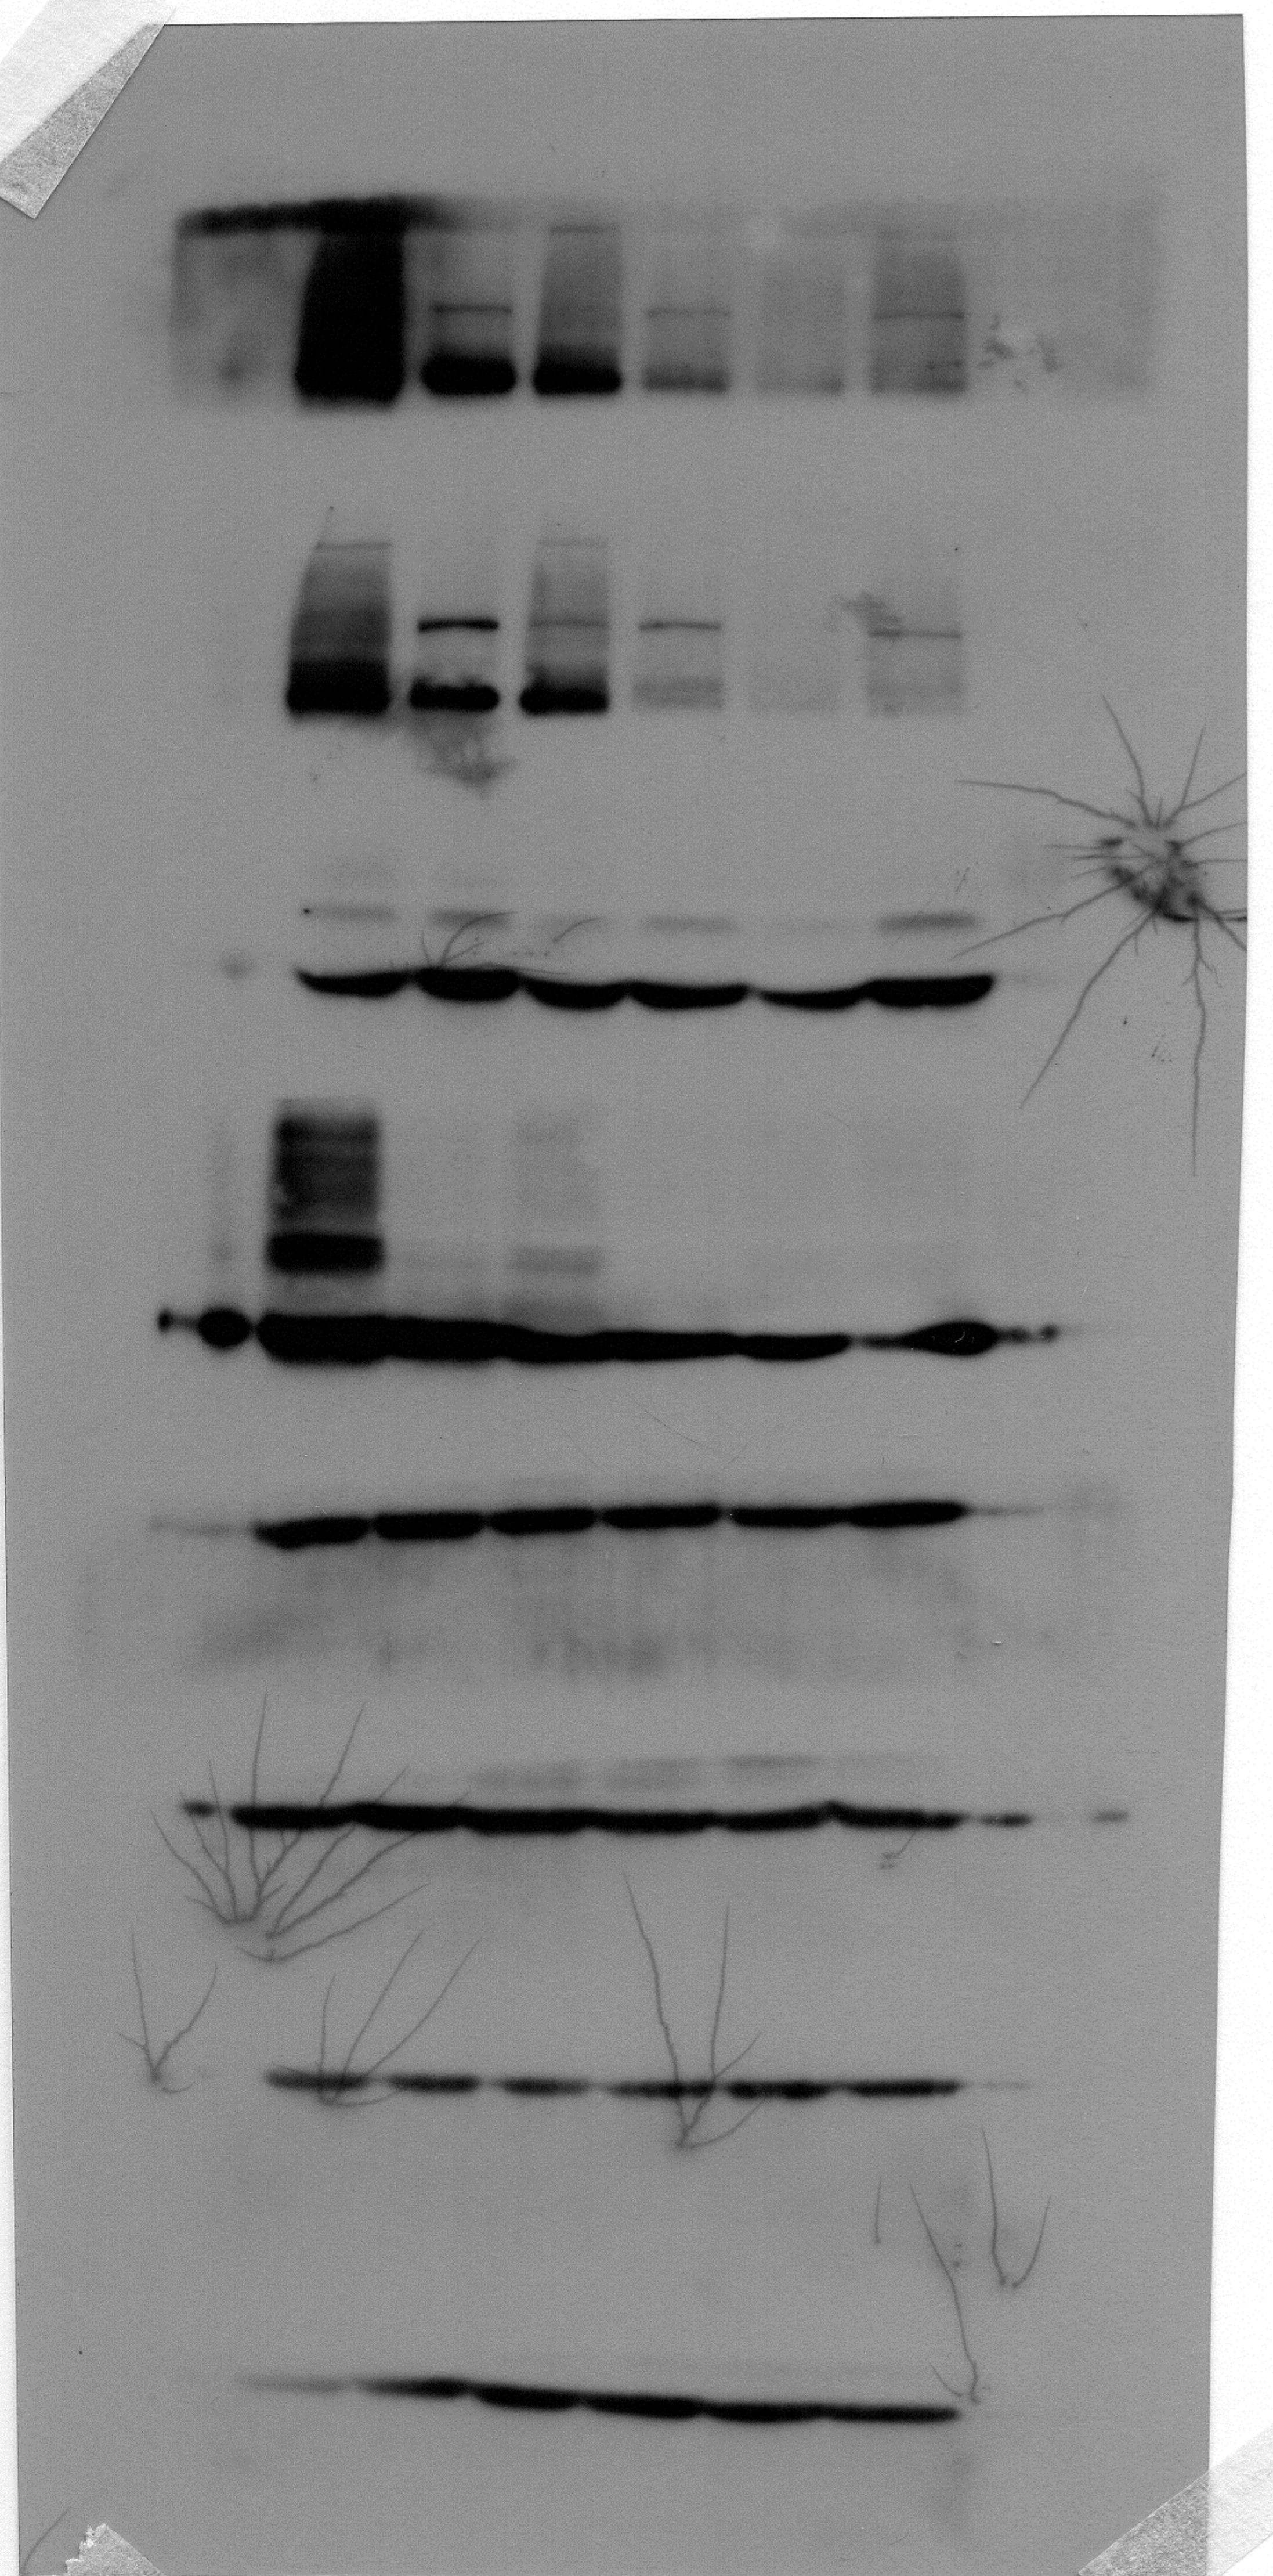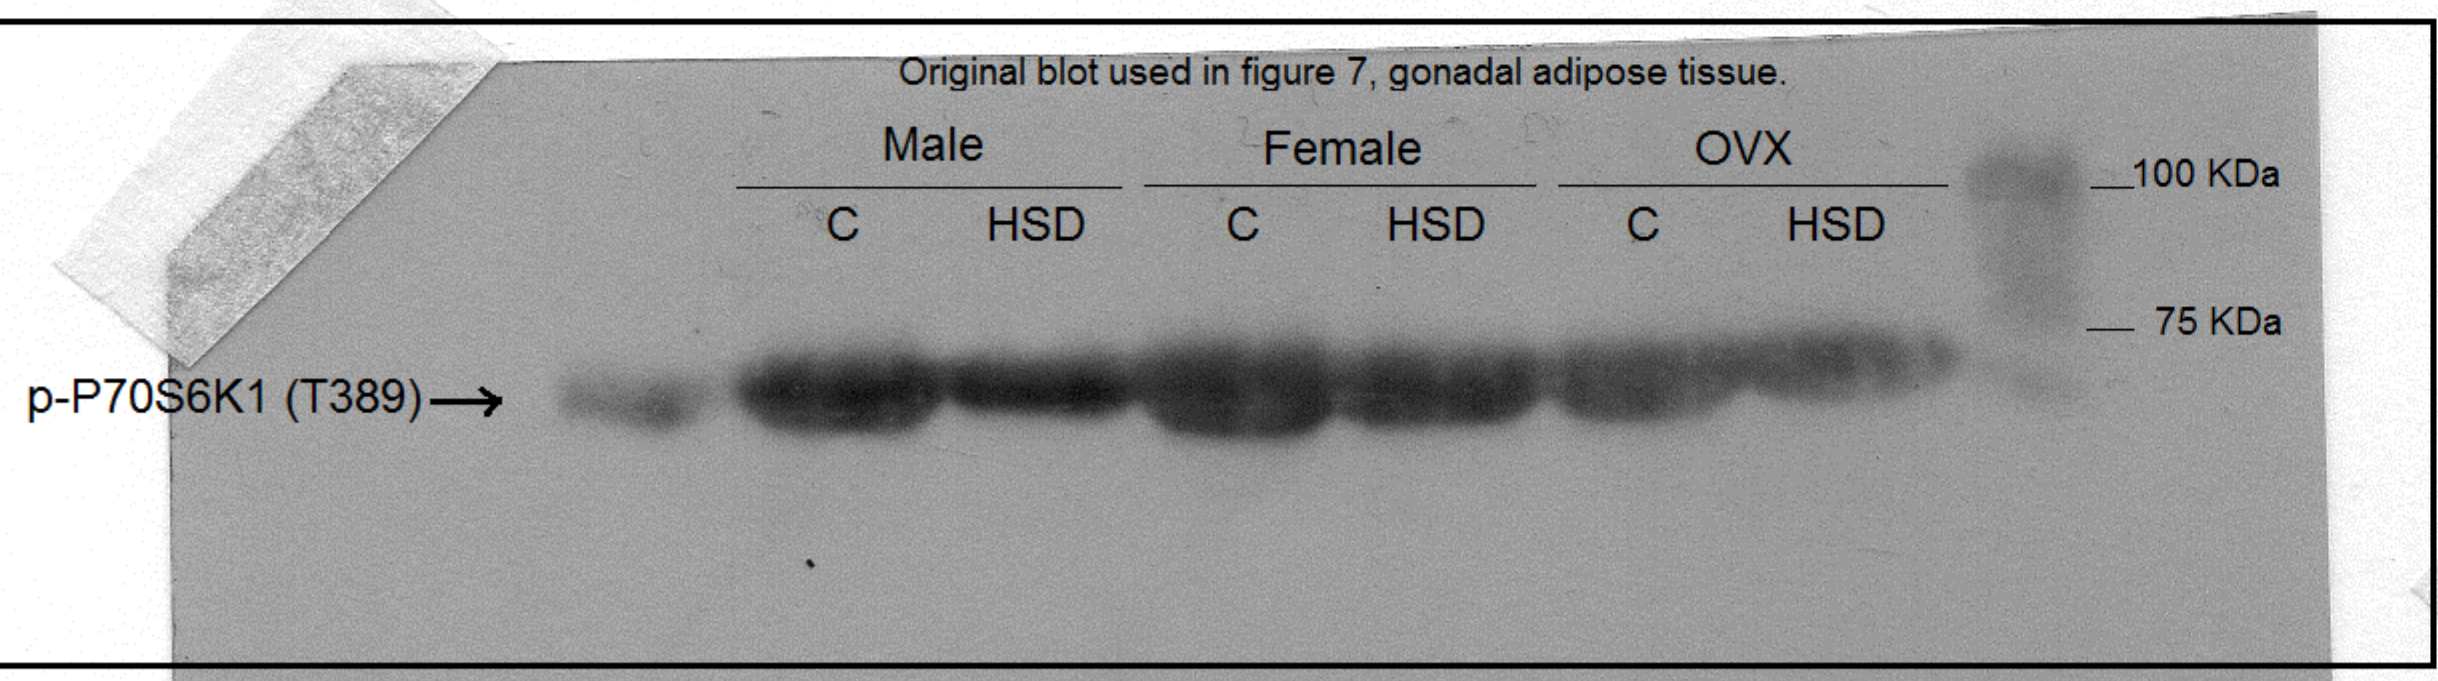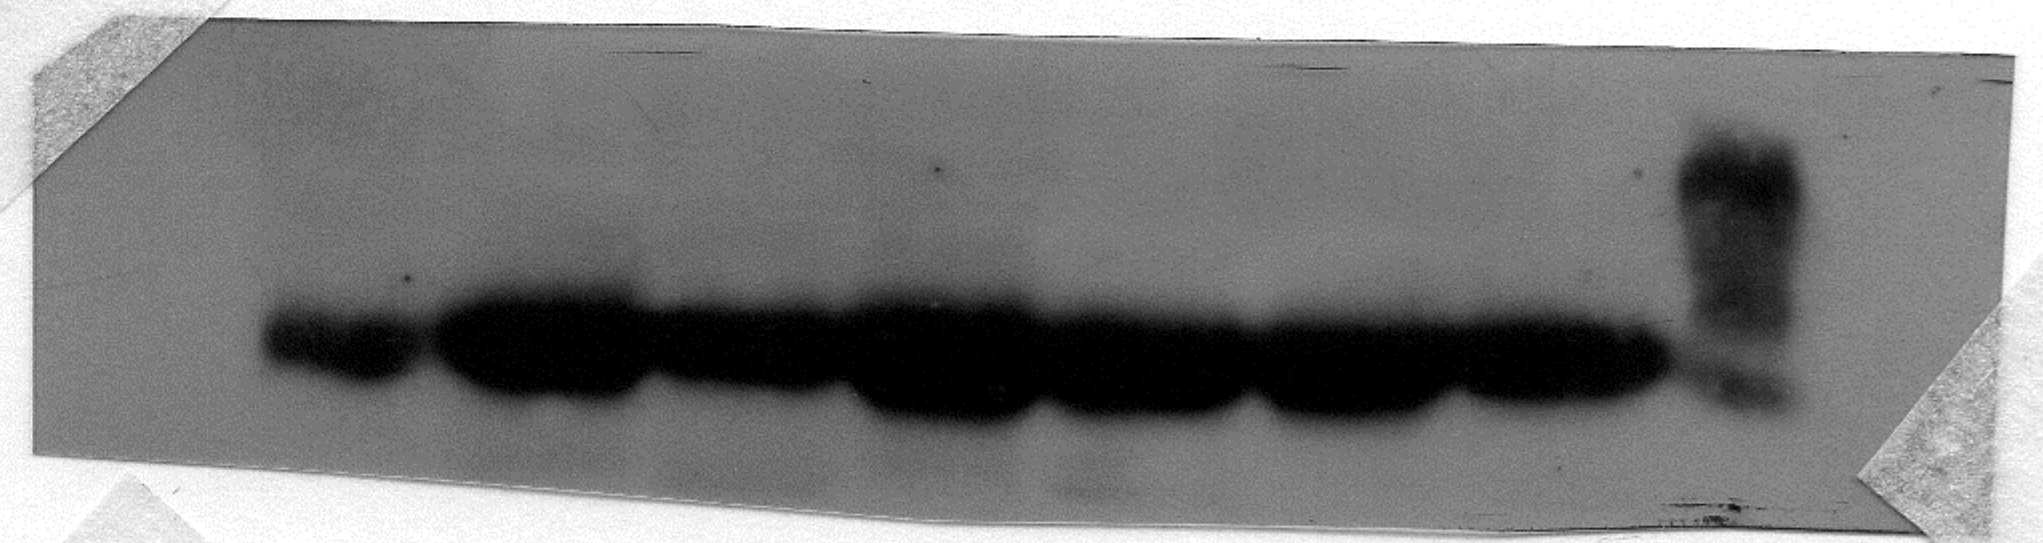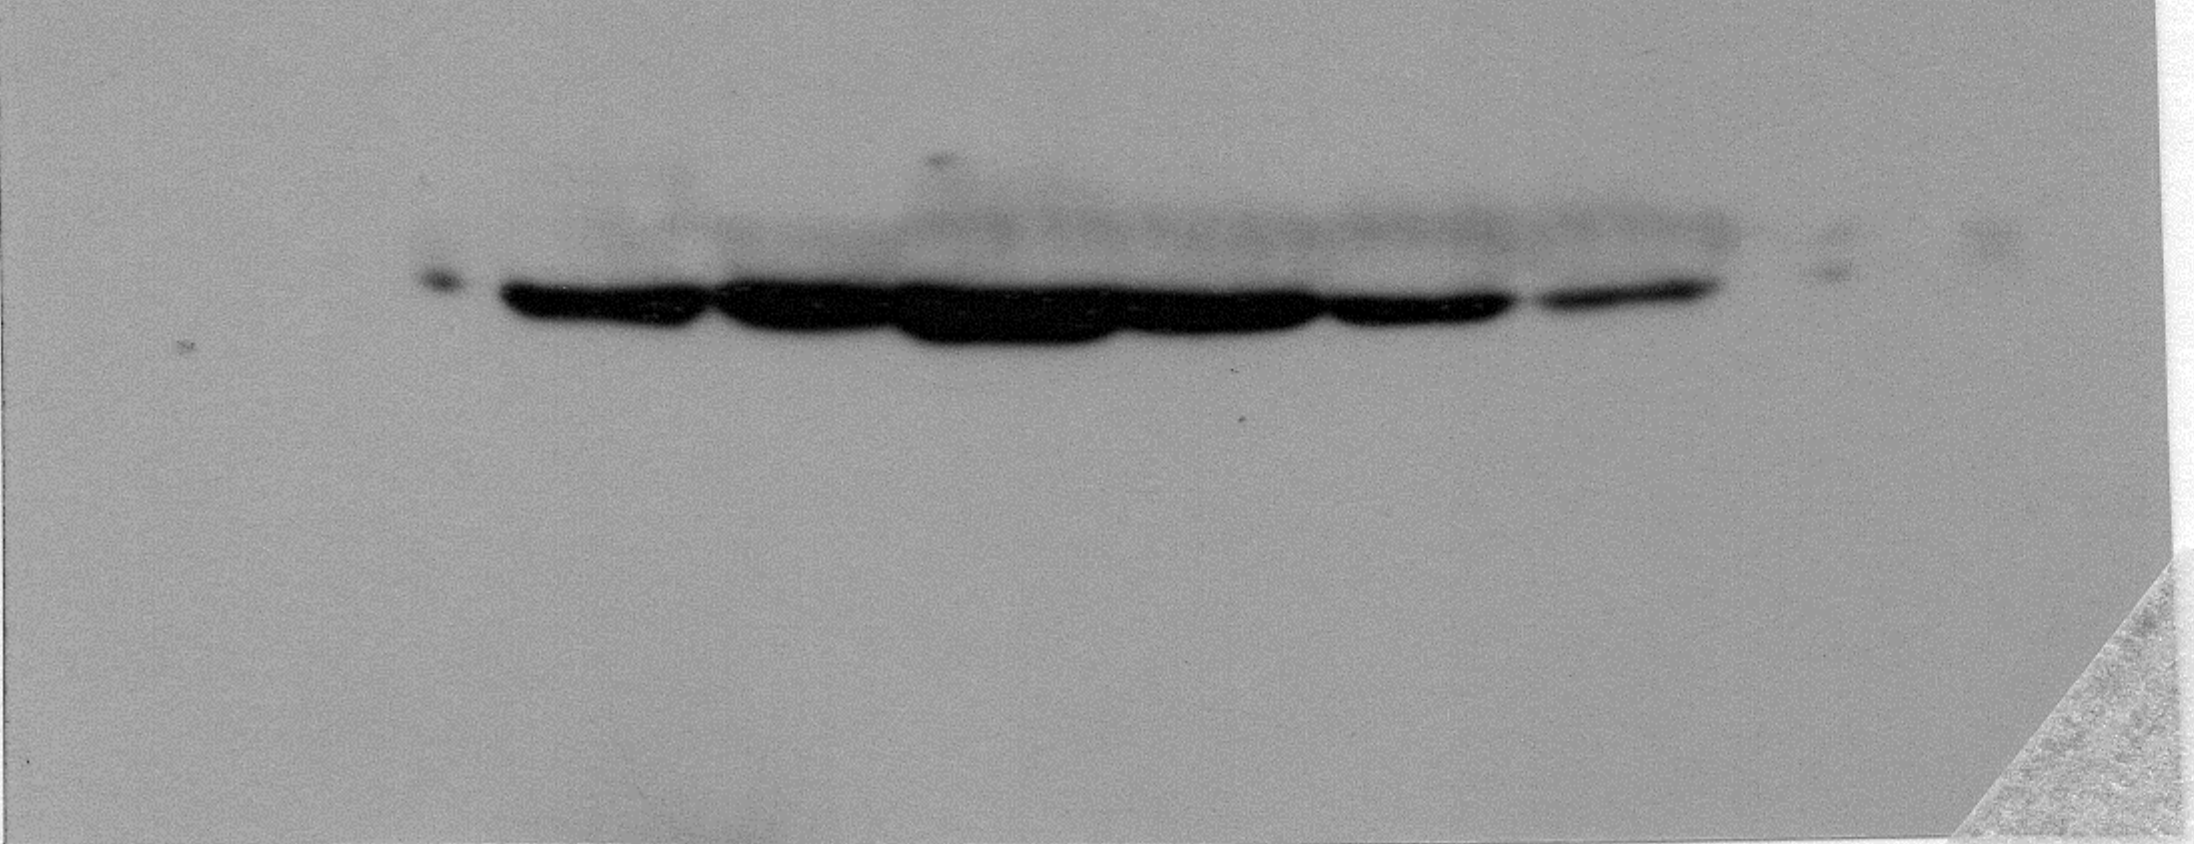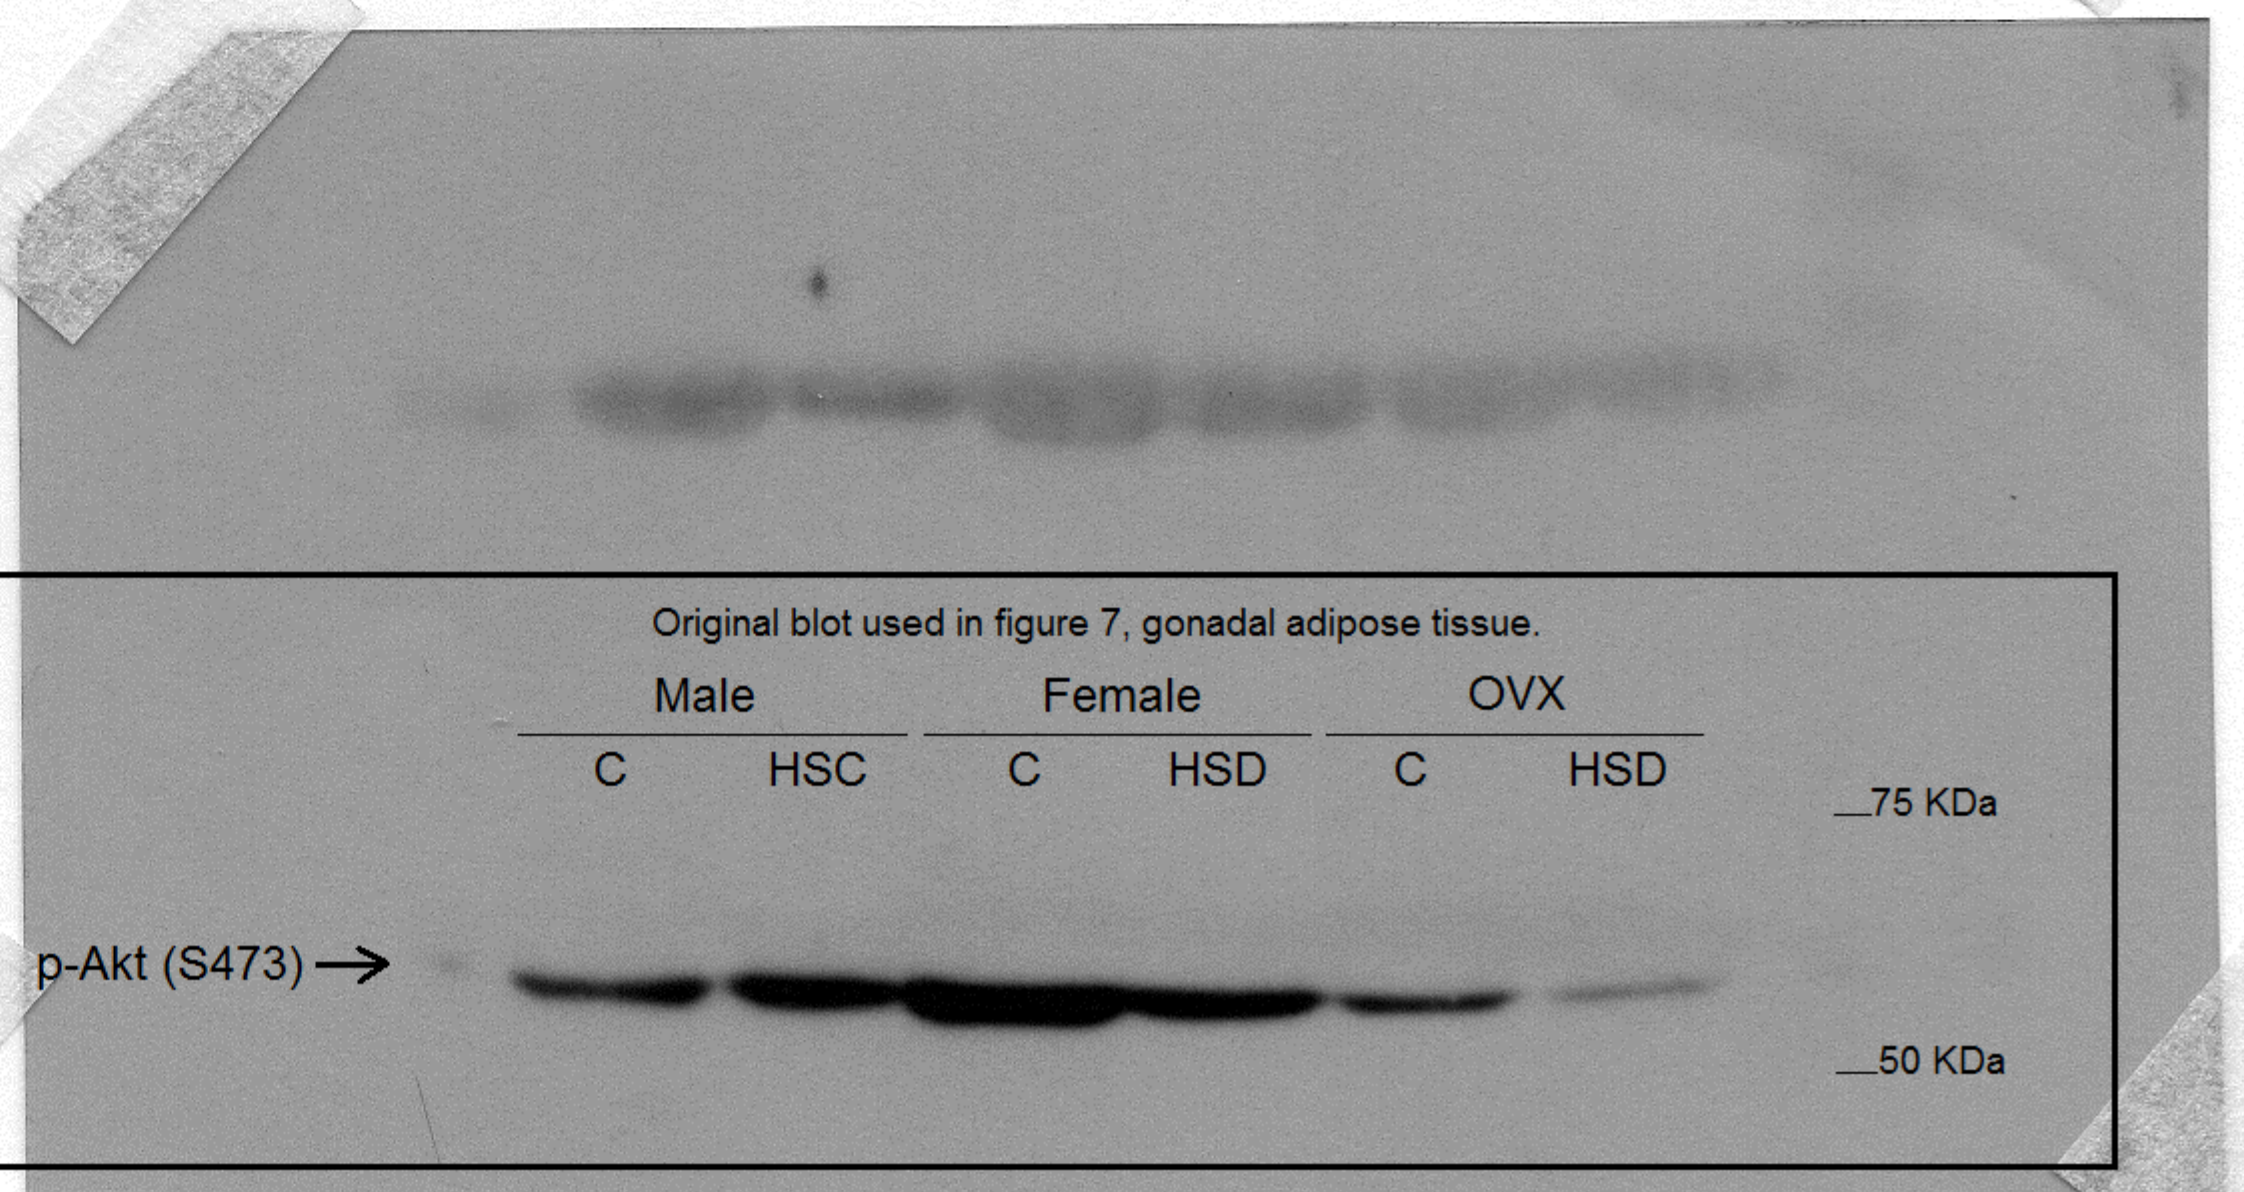

11ADN118

Supplement: supplementary_figure_8.pdf [file supplementary_figure_8.pdf]

1AG

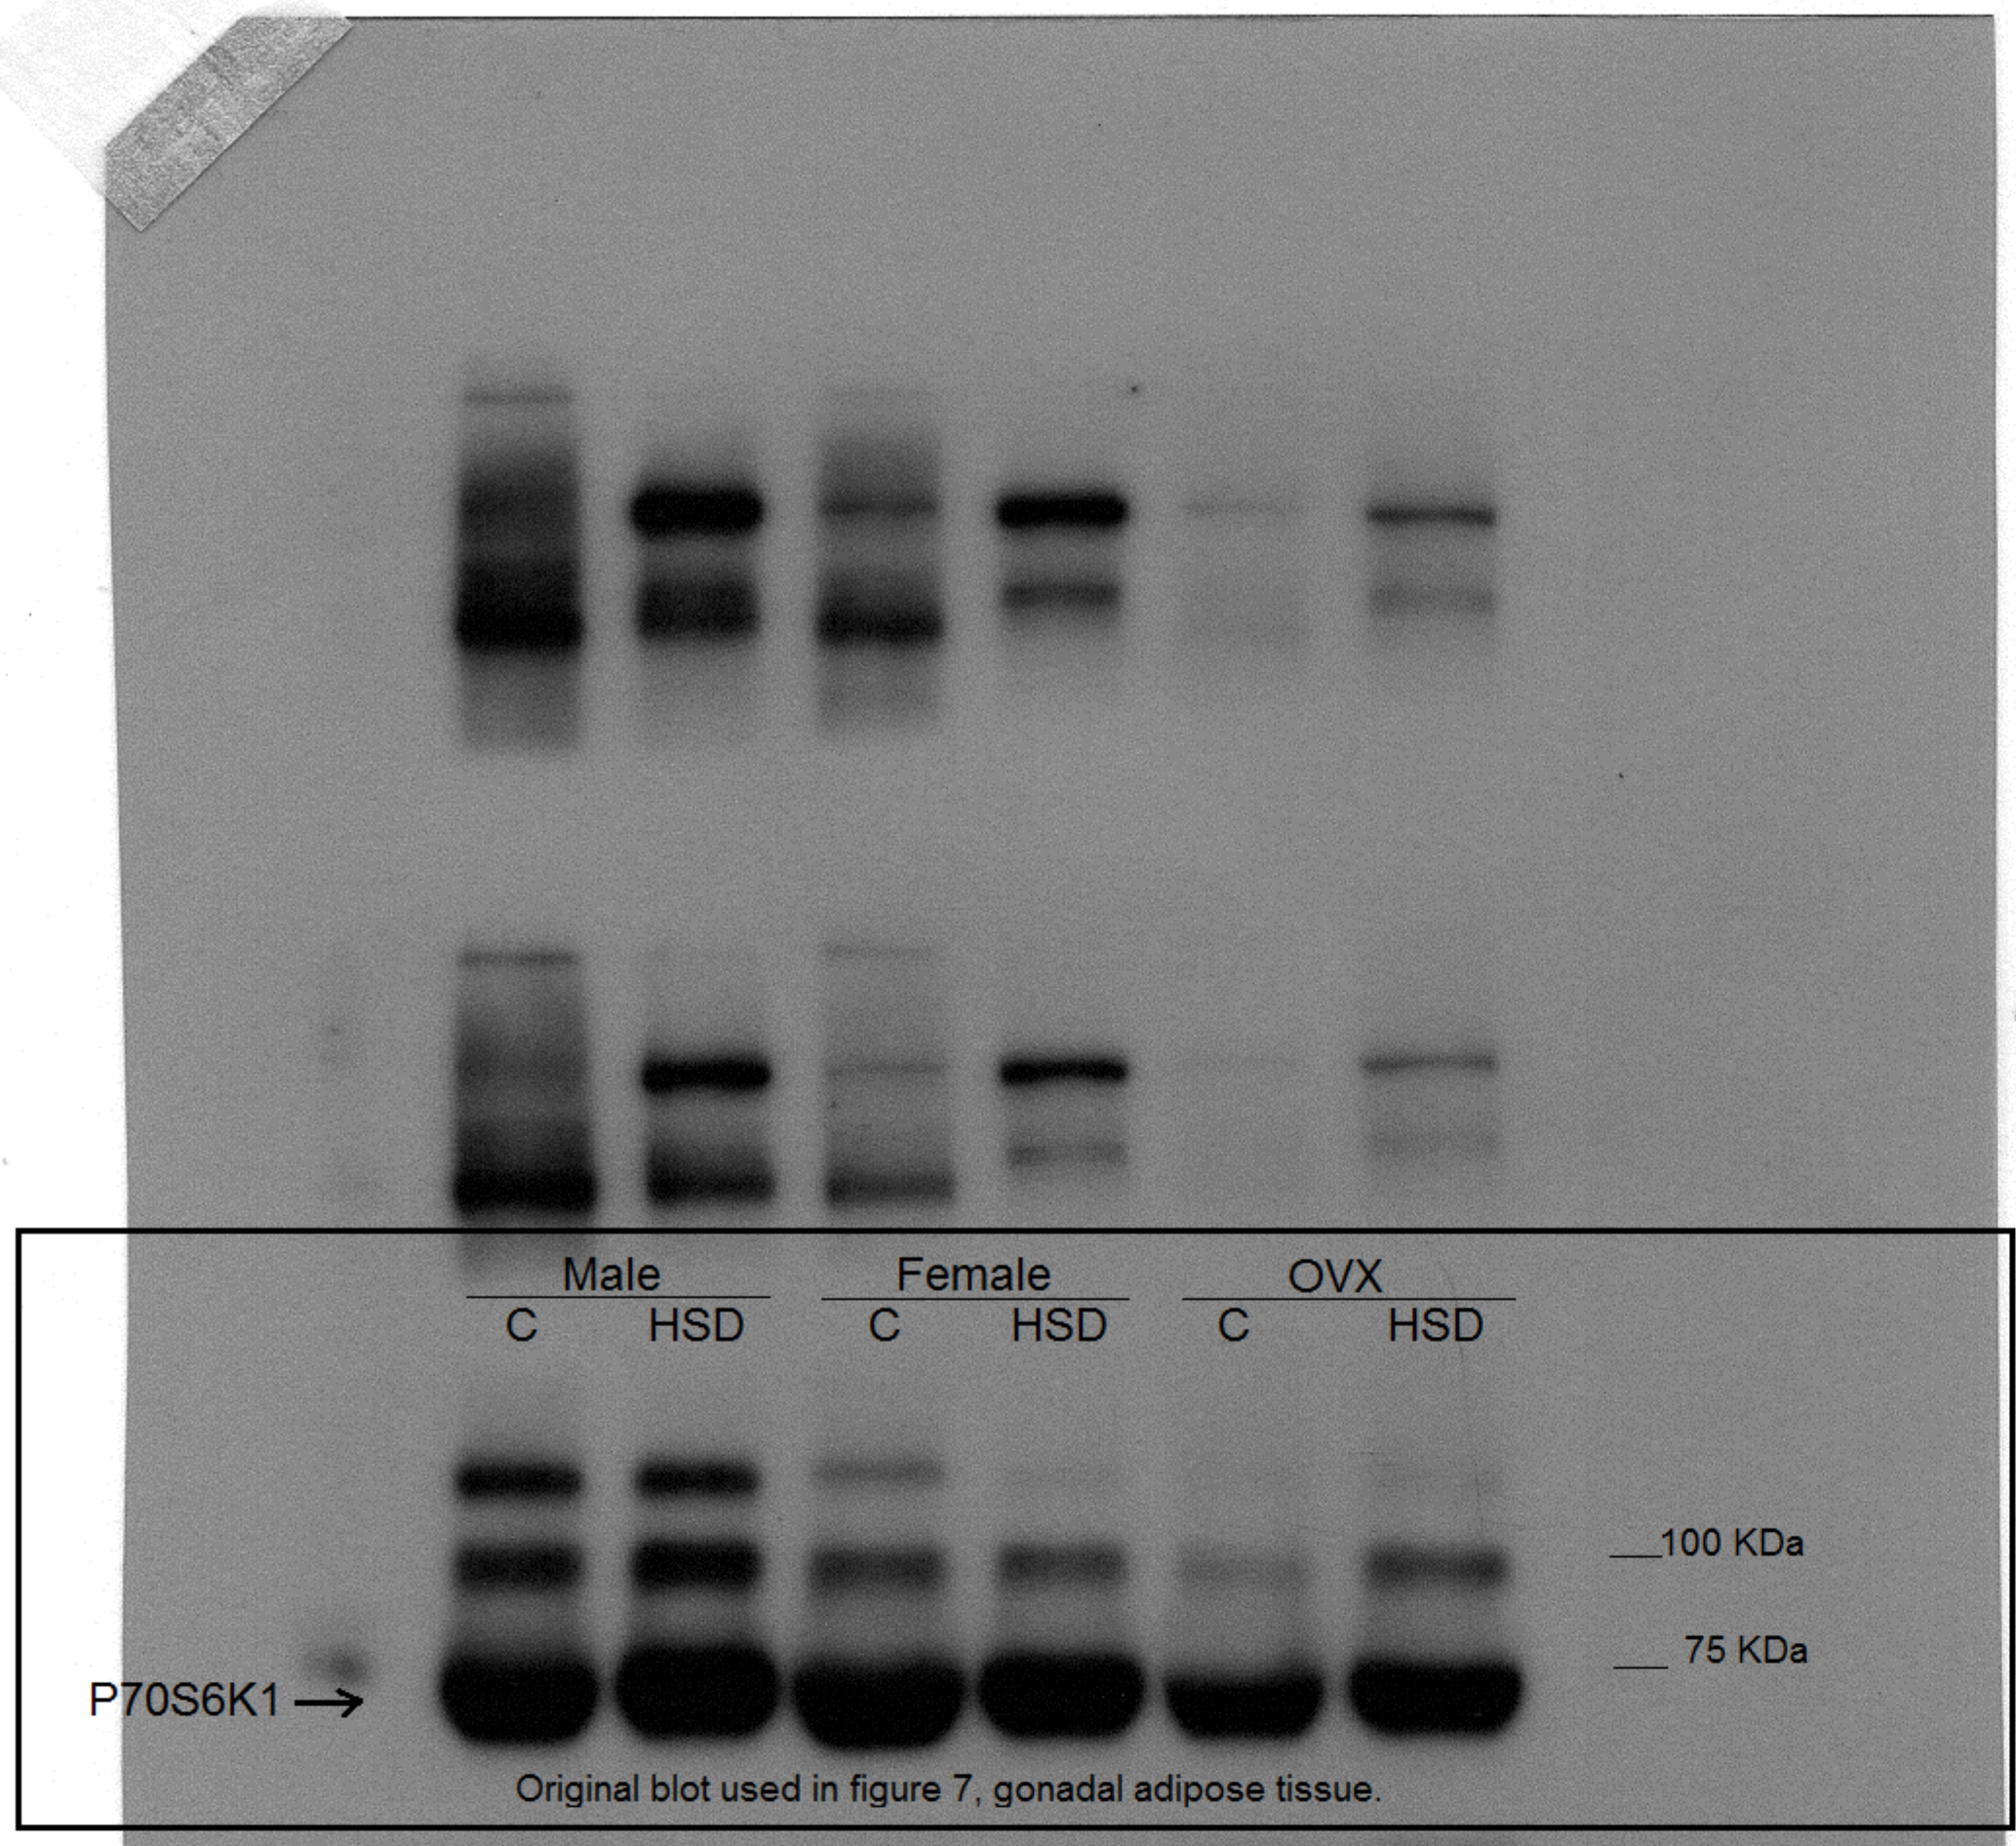

← IRS1

← S6K1

← Akt

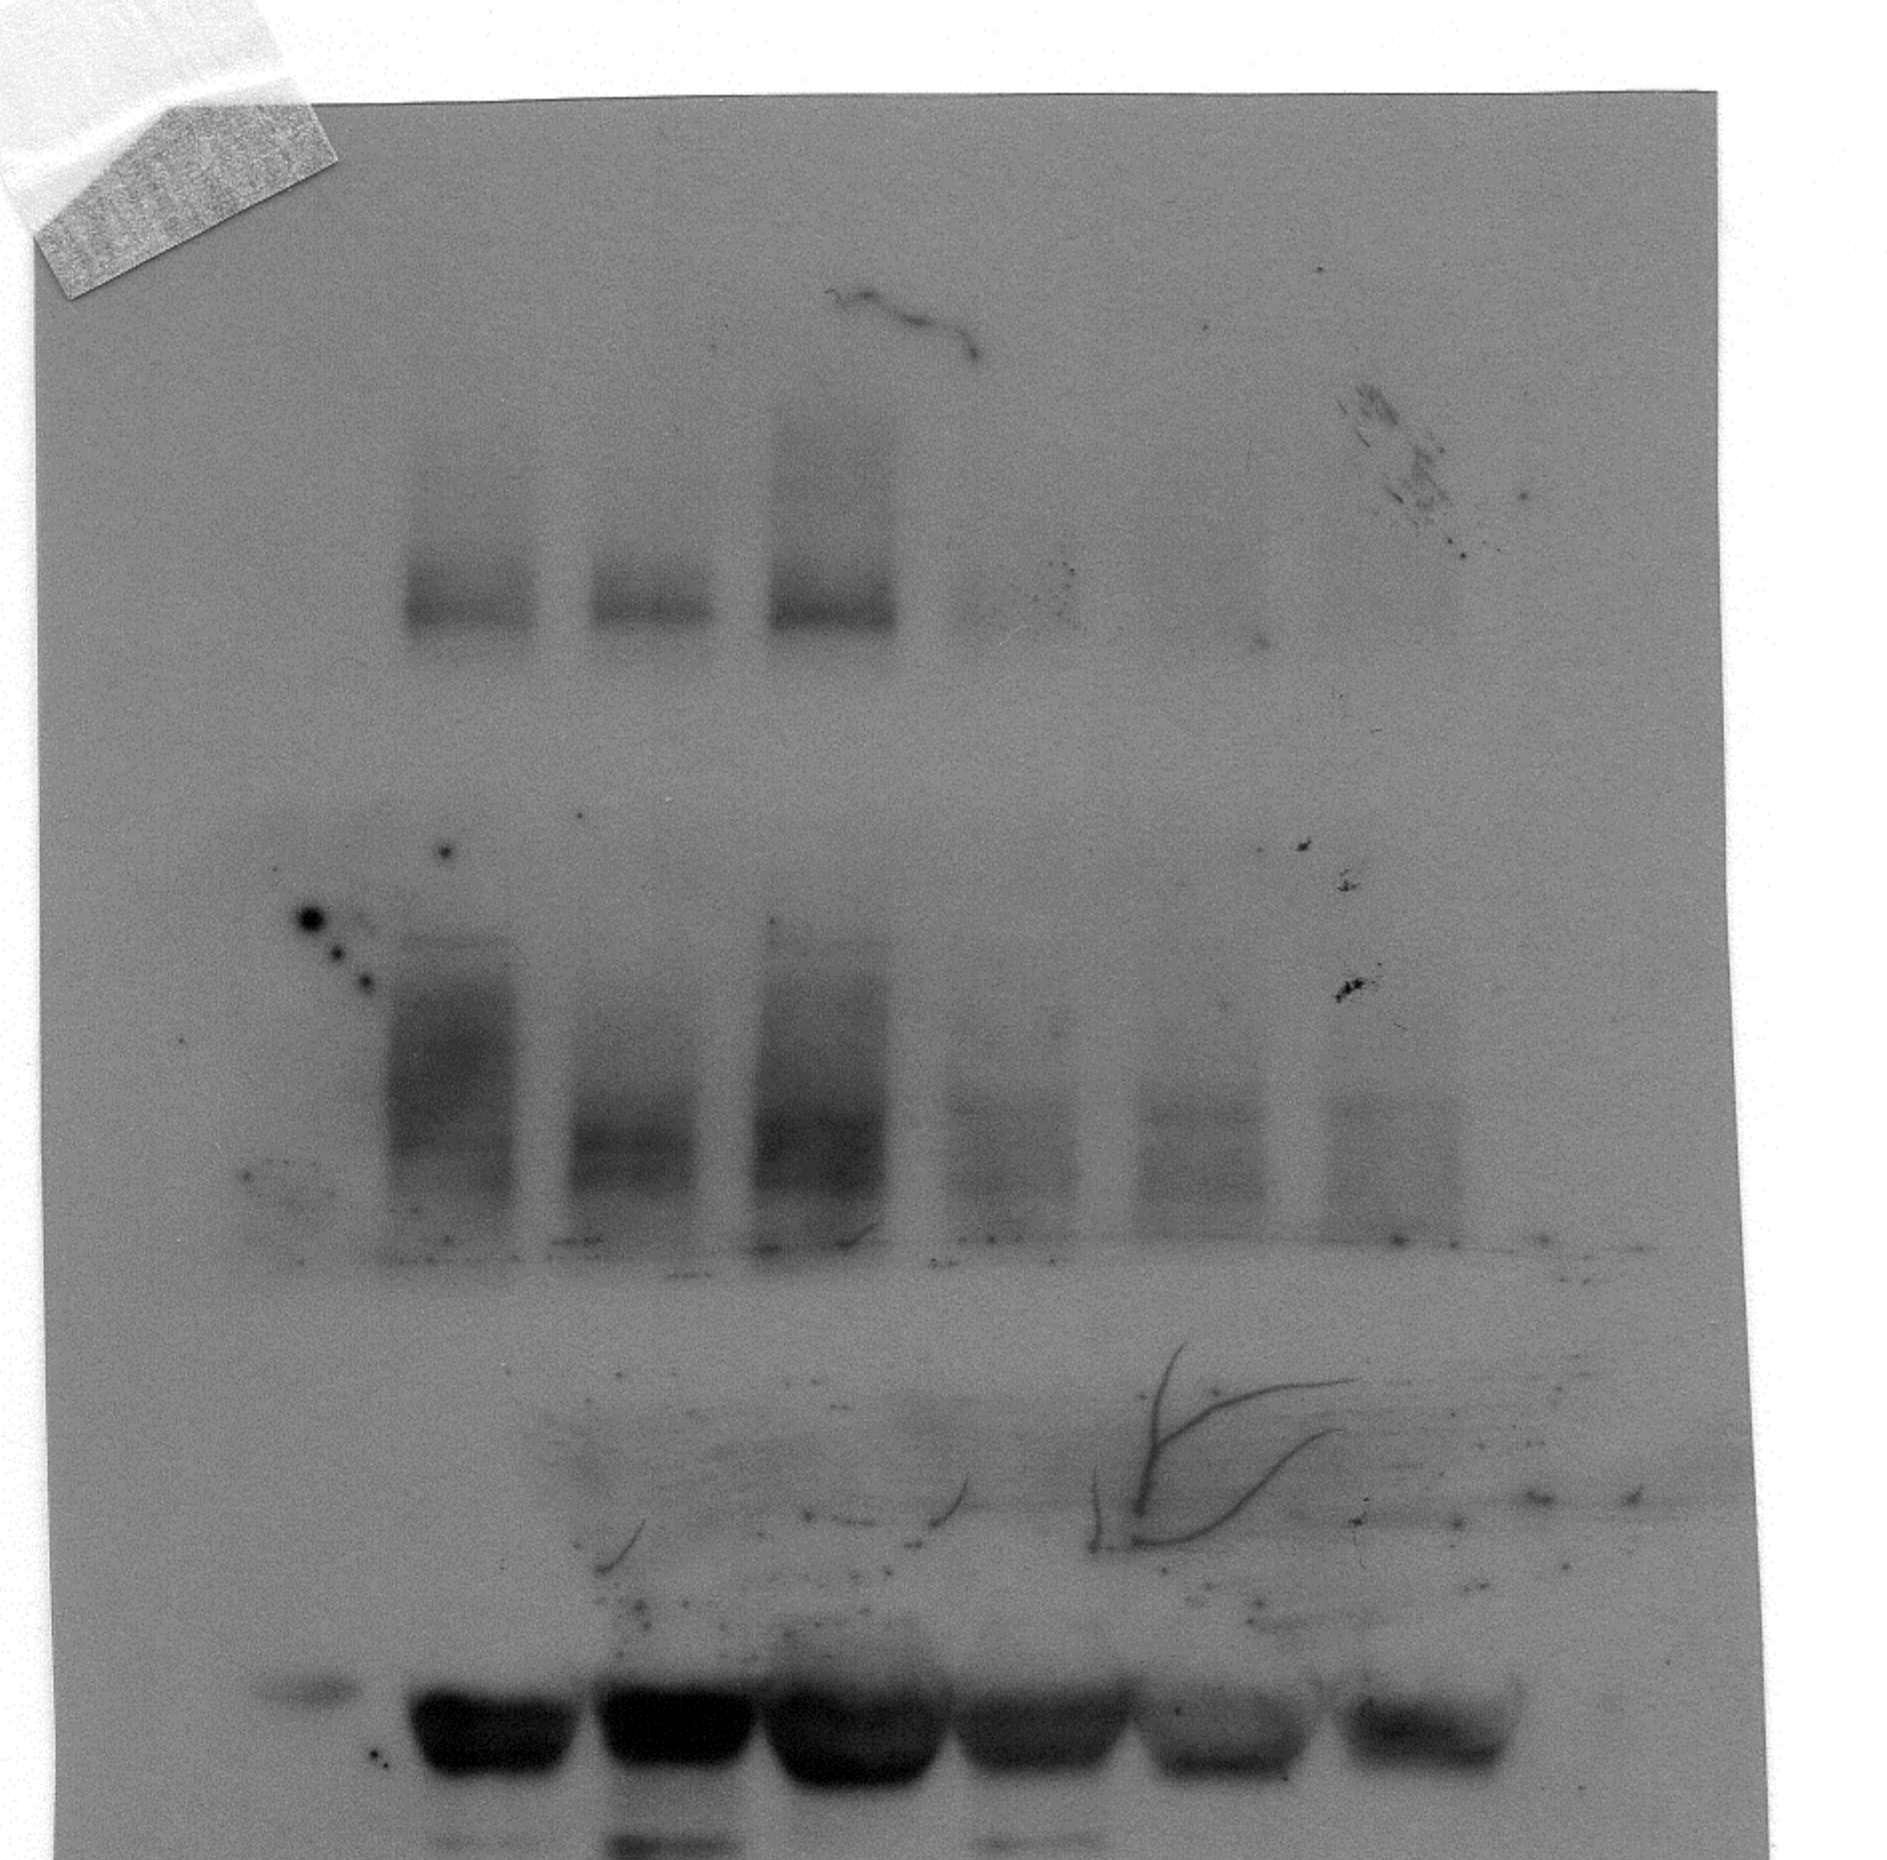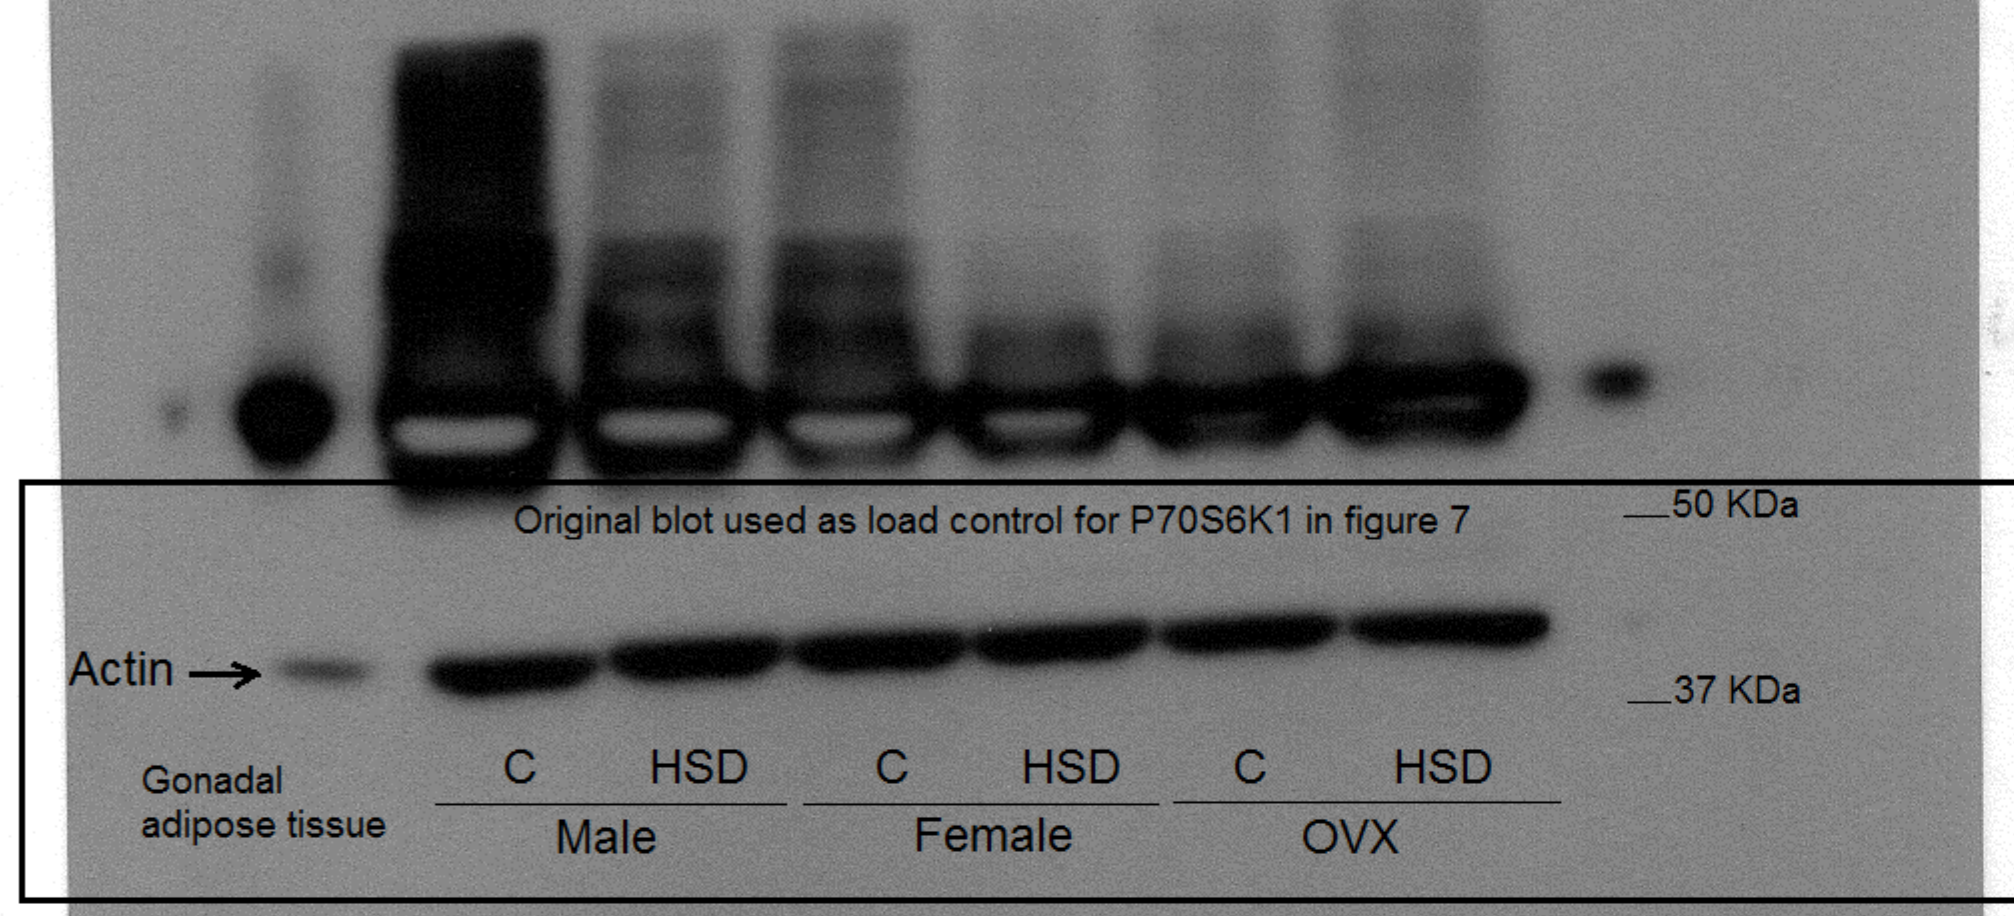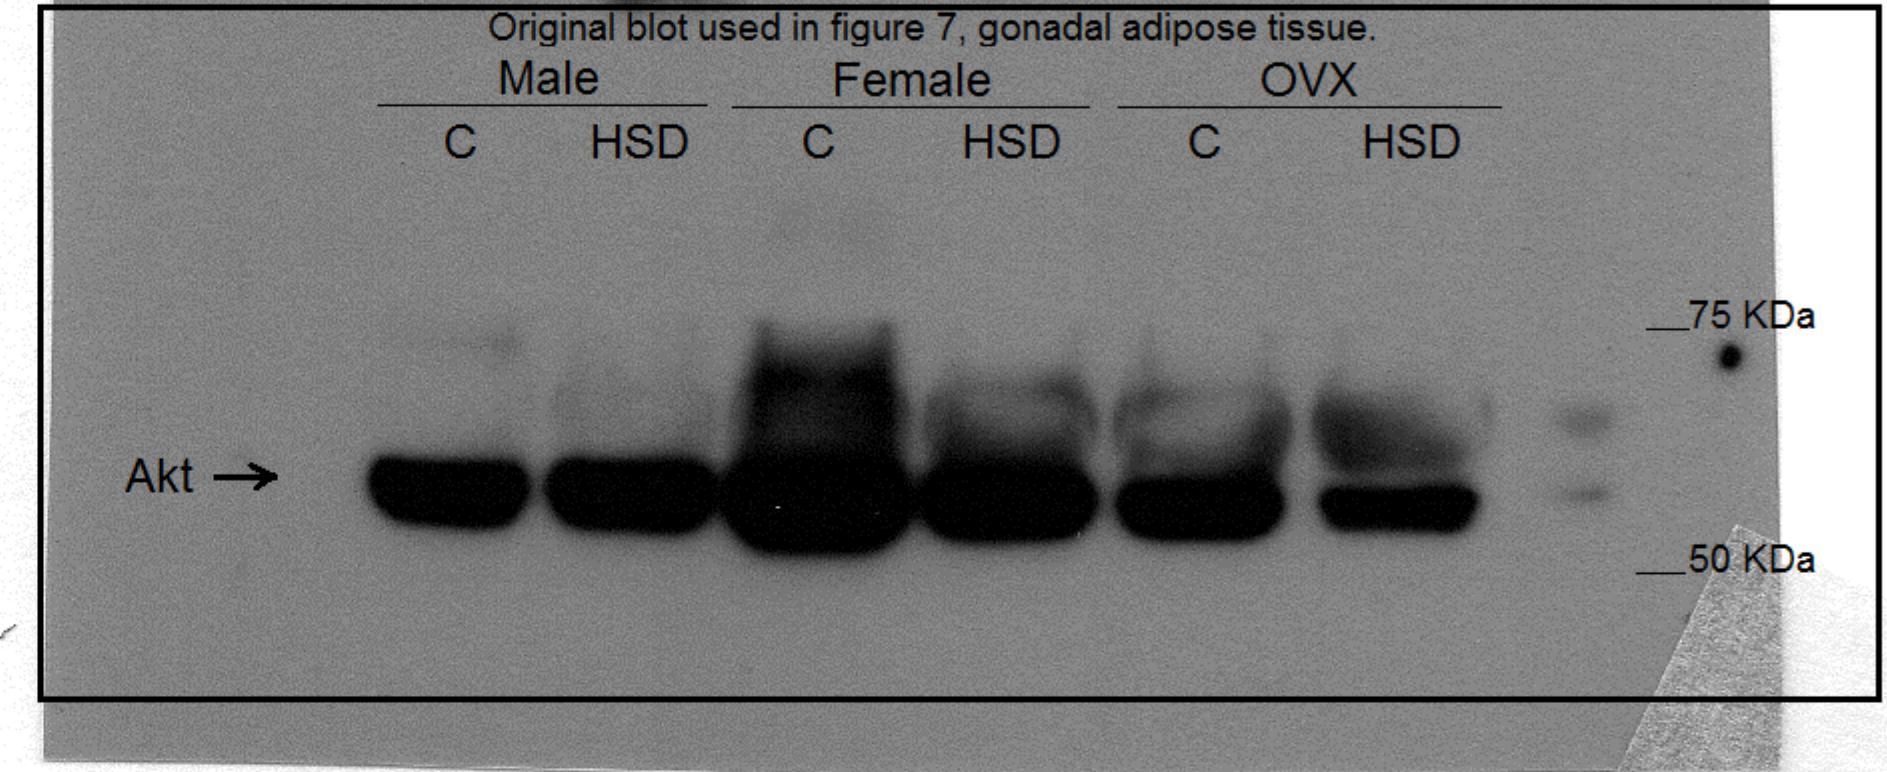

actinas

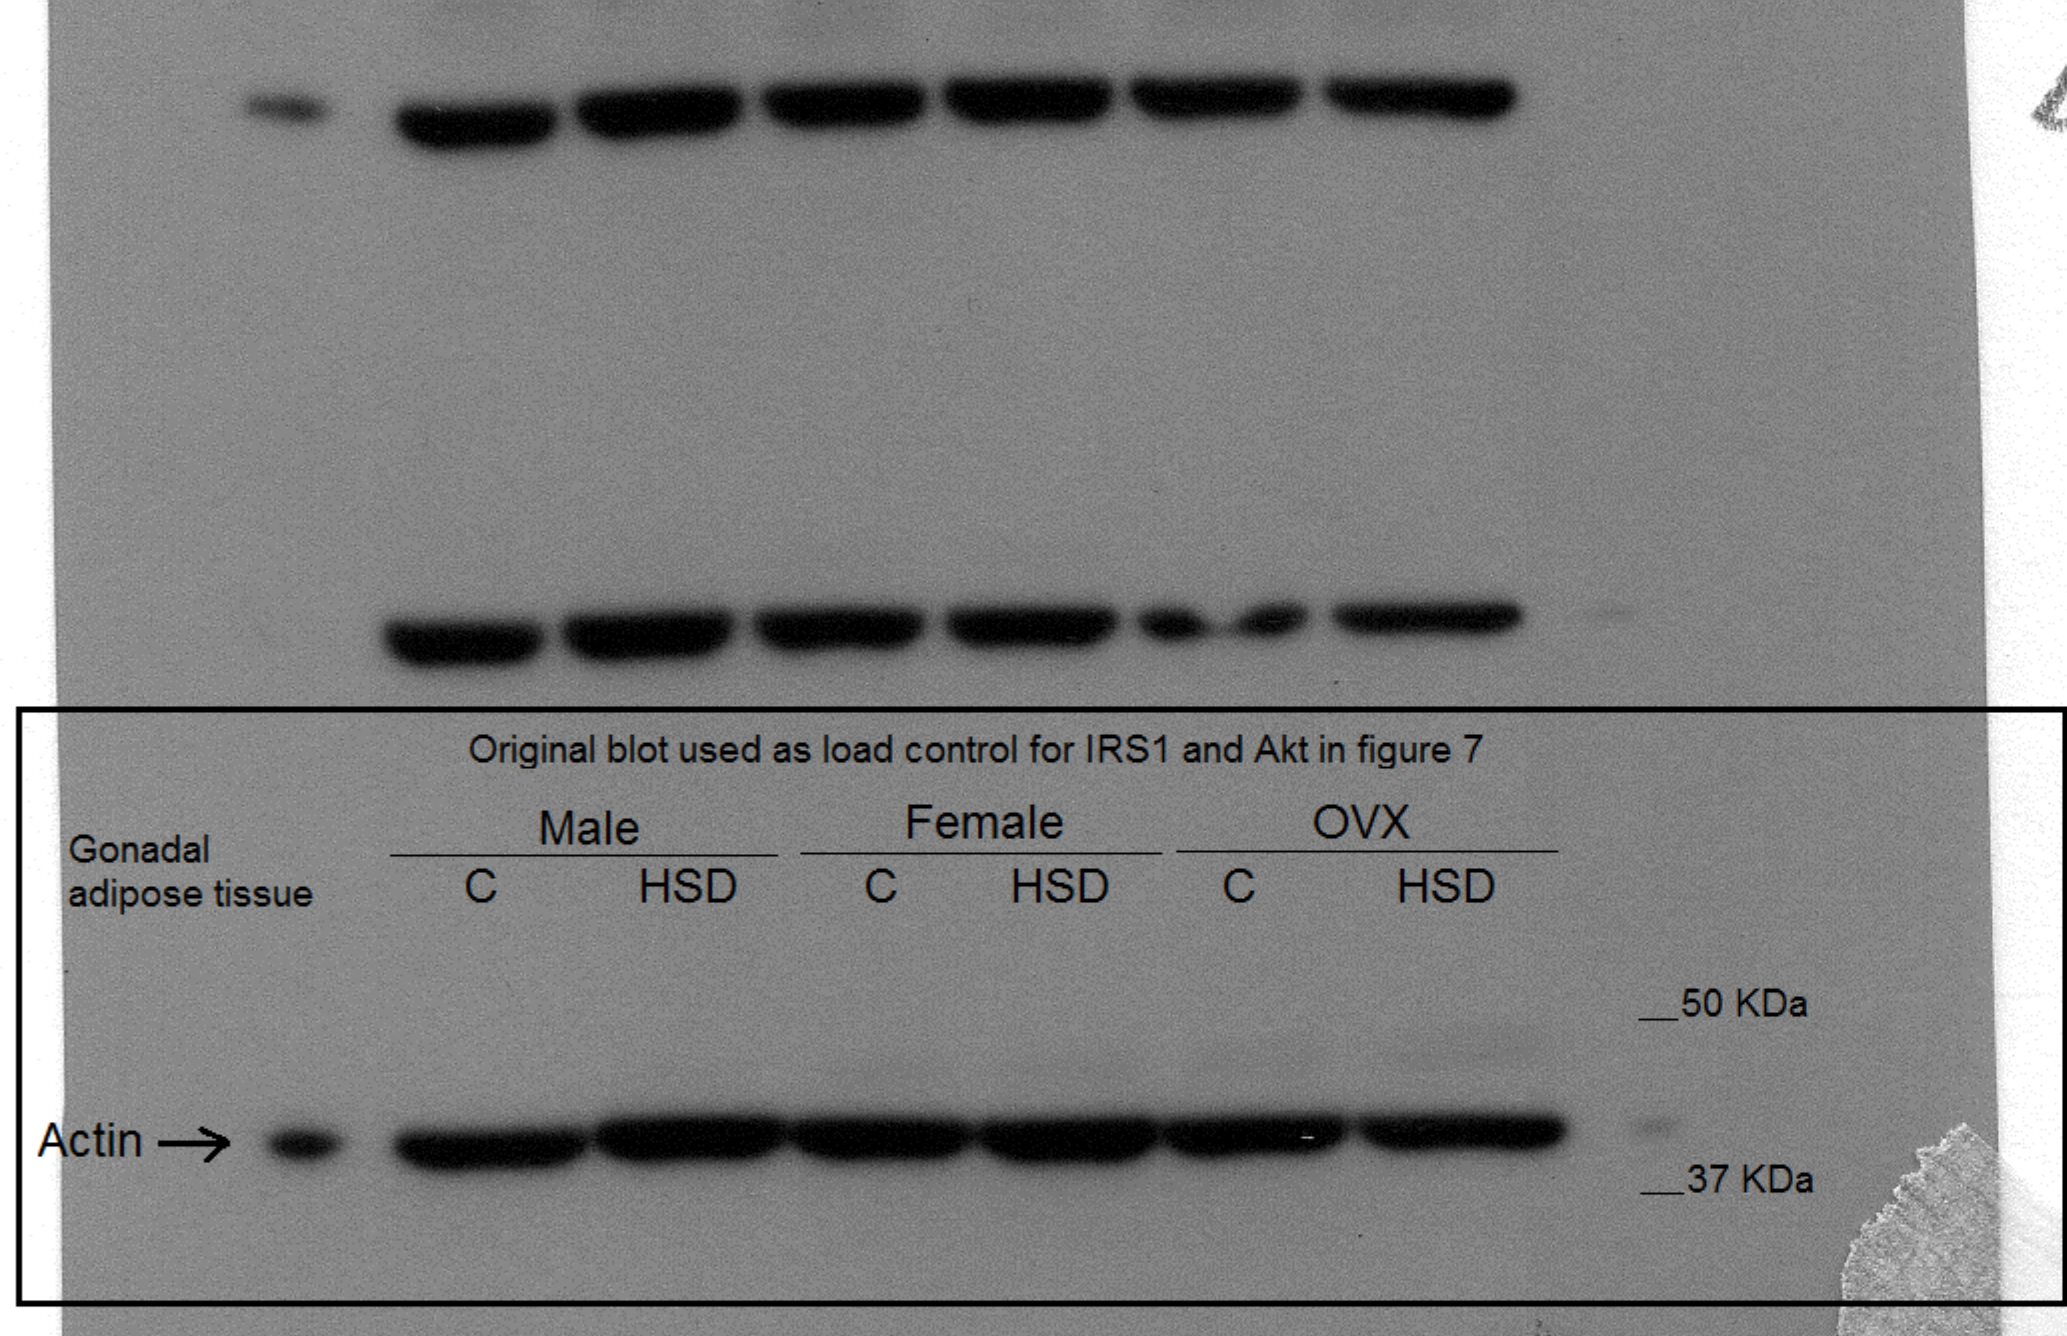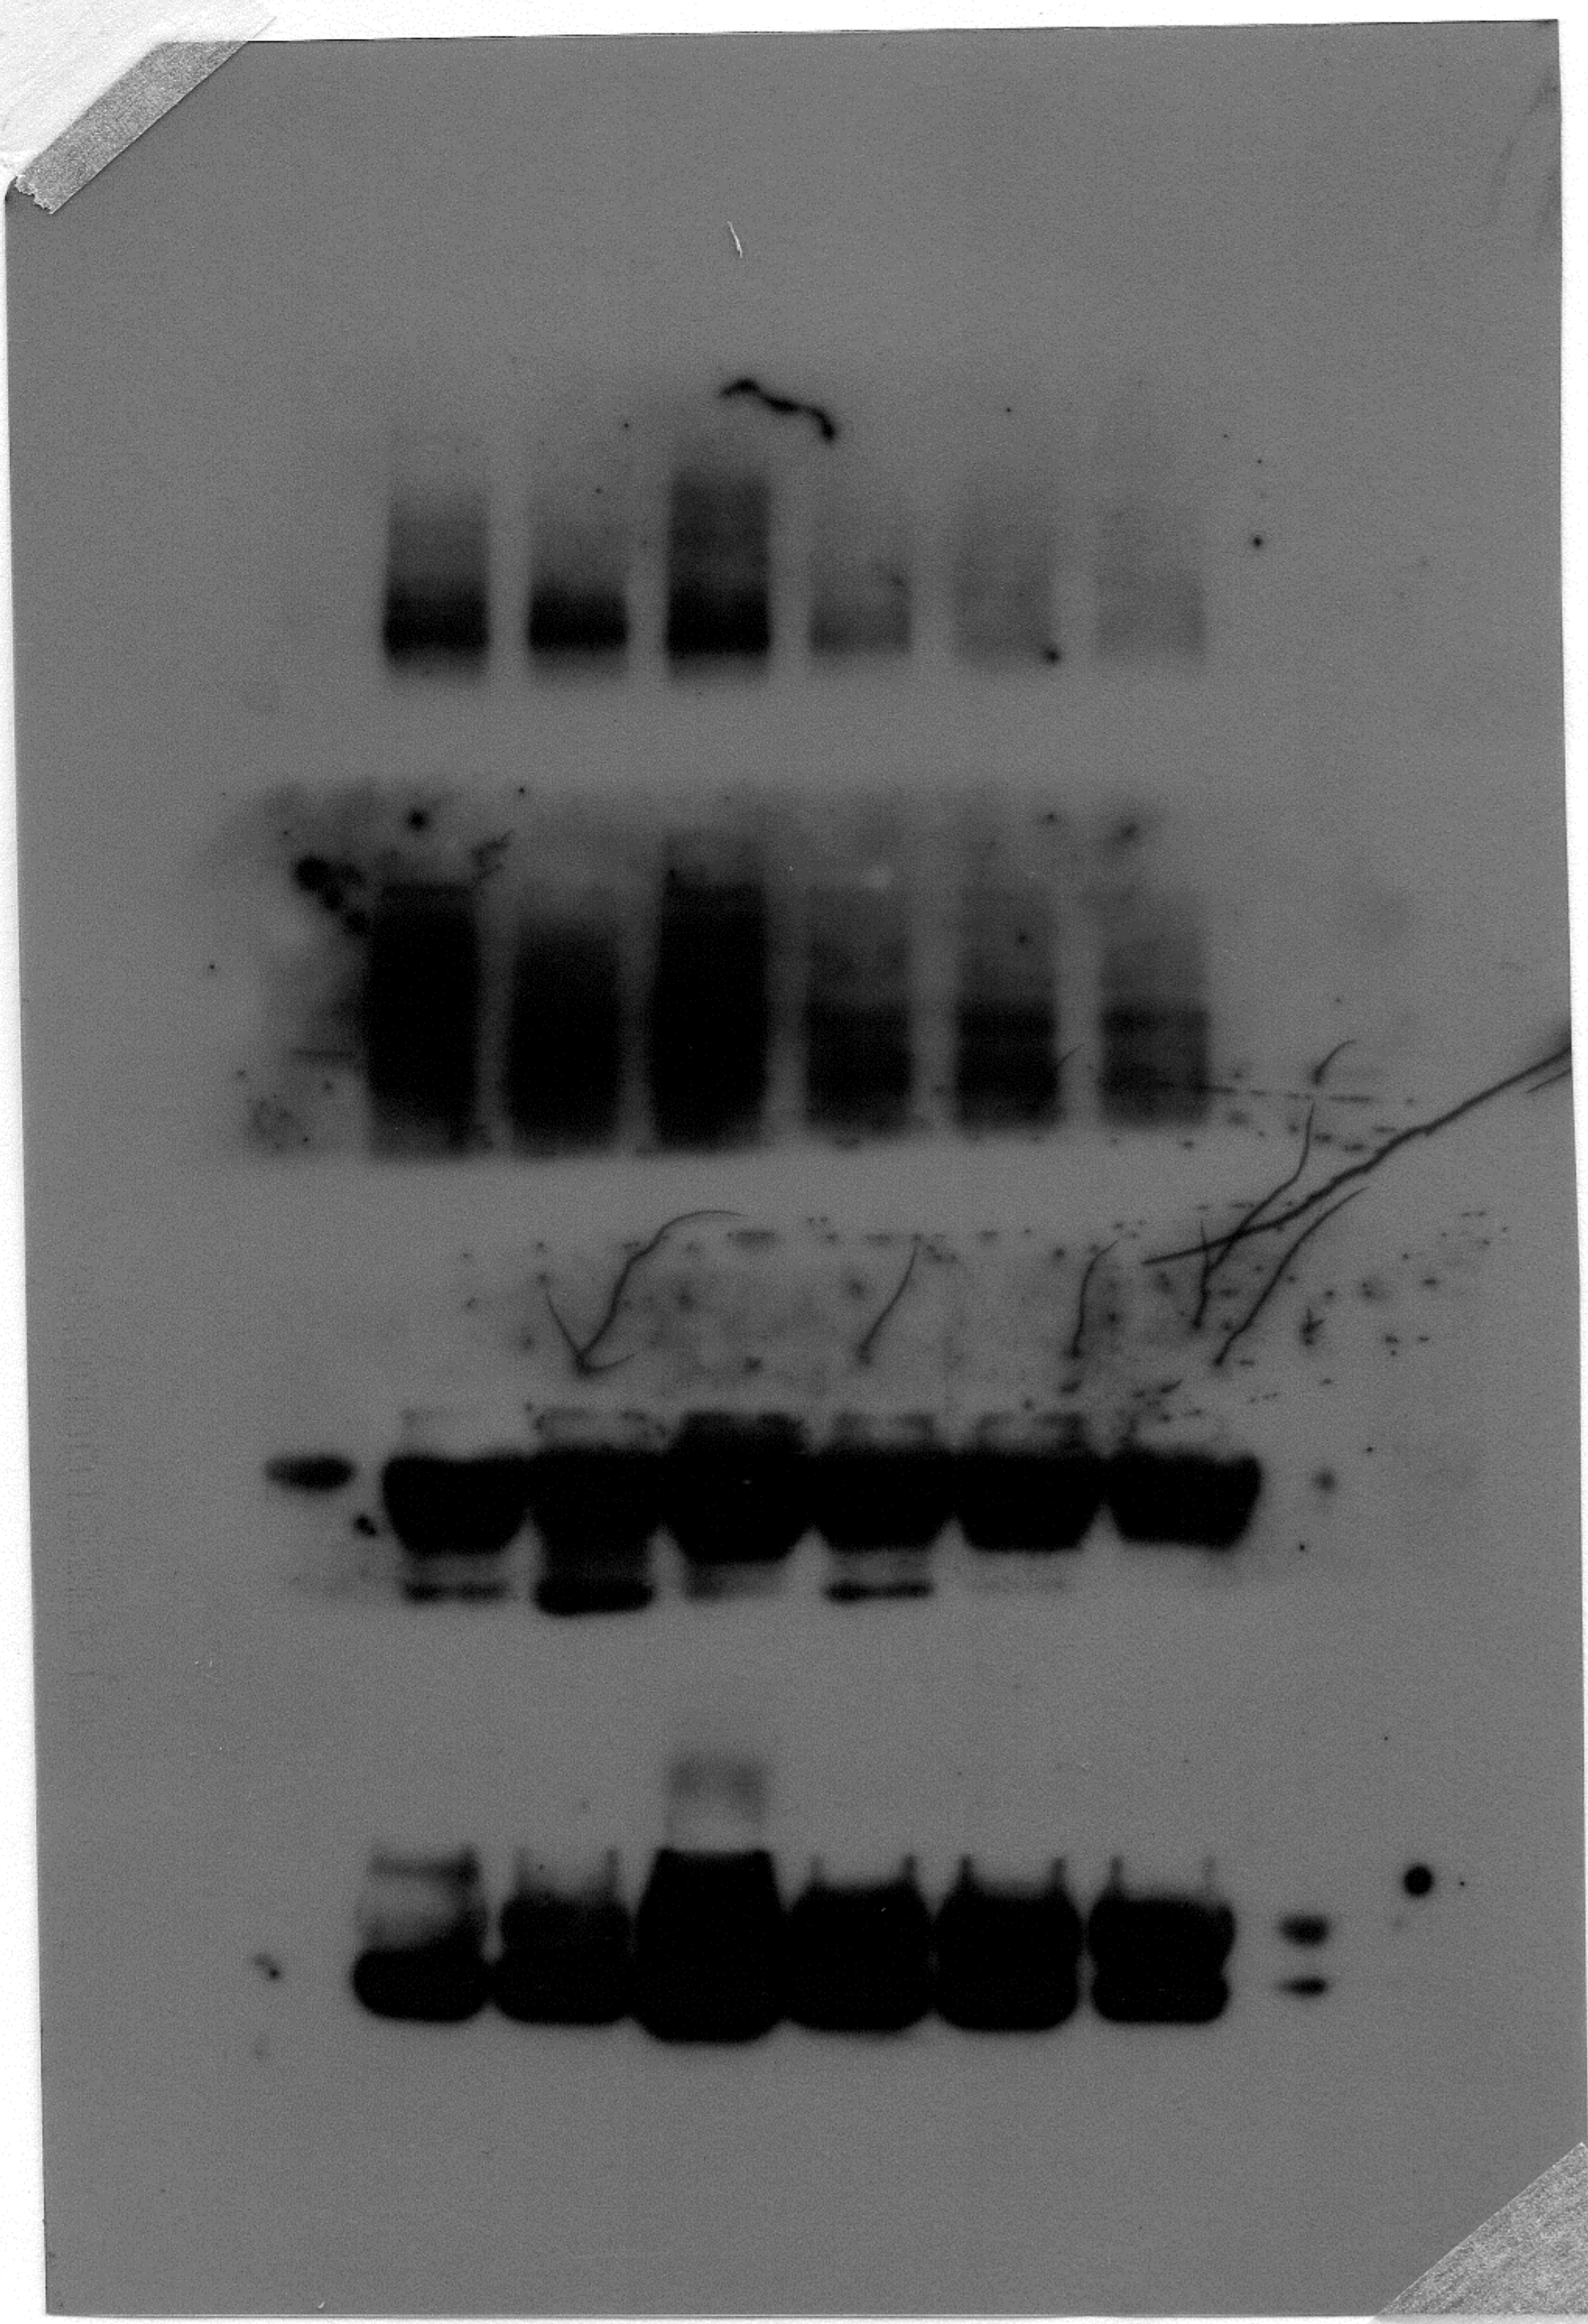

23 Ene 18

Supplement: supplementary_figure_9.pdf [file supplementary_figure_9.pdf]
